# Supplementary material for: A Natural Antimicrobial Agent: Analysis of Antibacterial Effect and Mechanism of Compound Phenolic Acid on Escherichia coli Based on Tandem Mass Tag Proteomics
Source: Front Microbiol. 2021 Nov 29;12:738896. doi: 10.3389/fmicb.2021.738896 (PMC8666975; doi:10.3389/fmicb.2021.738896)
Supplement: Supplementary file 1 [file Table_1.XLSX]

## Sheet: Protein Quant
Protein accession	Protein accession number of database used for search
Protein description	Protein functional description
Gene name	Indicates the name of the gene that code for the protein sequence
MW [kDa]	Protein molecular weight ,unit [kDa]
Score	A simple rule to be used to judge whether a result is significant or not
Coverage [%]	Percent of identified peptdie sequence covering in protein sequence
Peptides	Number of peptides whitch spectrums hit
Unique peptides	Number of unique peptides which spectrums hit
Protein accession	Protein description	Gene name	MW [kDa]	Coverage [%]	Peptides	Unique peptides	PSMs	B			A			A/B Ratio	A/B P value
								B1	B2	B3	A1	A2	A3
UPI000012C5A4	Coproporphyrinogen-III oxidase	--	52.728	37.6	17	17	27	1.006	1.017	0.984	1.004	0.996	0.999	0.997	0.809118
UPI000013BC87	TIGR00659 family protein	--	24.469	6.5	1	1	1
UPI000012F8E9	G/U mismatch-specific DNA glycosylase	--	18.673	48.8	7	7	18	0.98	0.985	0.957	1.023	1.048	1.034	1.063	0.00578106
UPI0000163979	Conserved inner membrane protein	--	16.939	17.8	3	3	4	0.899	0.997	1.053	1.1	1.018	0.944	1.038	0.586799
UPI000013A974	FCD domain protein	--	26.565	47.4	7	7	11	0.948	0.972	0.916	1.006	1.011	1.071	1.089	0.0324602
UPI000003EADC	Sulfurtransferase TusD	--	13.641	16.4	1	1	1	0.909	1.345	1.006	0.875	1.04	0.852	0.849	0.311866
UPI000003EAC1	50S ribosomal protein L36	--	4.3643	34.2	2	2	5	0.949	0.997	0.92	1.05	1.061	0.999	1.085	0.0518377
UPI0000047CAE	Fimbrial biogenesis usher protein FimD	--	96.481	6.2	4	4	5	0.793	0.976	1.005	1.15	1.153	0.934	1.167	0.203645
UPI0000000176	Toluene tolerance protein Ttg2D	--	23.962	66.4	13	13	42	1.008	1.063	1.004	0.96	0.977	0.986	0.951	0.0653701
UPI000003EB77	Putative adenylate cyclase	--	48.388	24.5	11	11	23	1.01	1.008	0.99	1.036	0.994	0.993	1.005	0.769221
UPI000003EAE4	50S ribosomal protein L2	--	29.86	59	16	16	100	0.819	0.933	1.012	1.152	1.076	0.997	1.167	0.103692
UPI000013A36D	Catecholate siderophore receptor fiu	--	81.959	2.5	1	1	1
UPI00001116DF	Molybdopterin synthase, small subunit	--	8.7578	37	2	2	4	0.995	0.845	0.924	1.051	1.089	1.039	1.15	0.045115
UPI00001E0555	Transcriptional regulator SlyA	--	16.353	38.2	5	5	13	0.961	0.965	0.966	1.02	1.025	1.047	1.069	0.00122036
UPI000013B055	Cysteine desulfurase sulfur acceptor subunit CsdE	--	15.94	27.2	3	3	7	1.076	1.01	1.034	0.93	0.917	0.98	0.906	0.0226855
UPI00001319A5	Phosphonate metabolism protein PhnP	--	27.847	20.2	4	4	5	1.072	1.136	1.014	0.889	0.942	0.964	0.867	0.0253229
UPI00001639D5	Penicillin-binding protein 7	--	33.887	6.1	2	2	2
UPI000013B57D	Regulator of ribonuclease activity B	--	15.603	5.1	1	1	3	0.964	0.973	1.03	1.042	1.037	0.983	1.032	0.320375
UPI000016542F	Ribose-phosphate pyrophosphokinase	--	34.218	52.4	13	13	87	1.003	1.008	0.999	1.011	1.005	1.013	1.006	0.14852
UPI000013AE79	Arsenate reductase	--	13.398	40.3	5	5	13	1	1.012	0.923	0.958	1.015	1.086	1.042	0.427493
UPI000012A735	Formate hydrogenlyase transcriptional activator	--	78.467	24.1	15	15	17	0.984	1.027	1.073	0.968	1.043	0.992	0.974	0.470771
UPI0000136BA6	Tellurite resistance protein TehB	--	22.53	33	8	8	10	0.954	0.982	0.975	0.936	0.98	1.05	1.019	0.635571
UPI000013AE7D	PF11119 family protein	--	7.4615	23.8	1	1	2	1.351	1.338	1.141	0.804	0.695	0.693	0.572	0.00162188
UPI000003EB3F	Glycerol-3-phosphate dehydrogenase	--	58.958	58.9	26	26	76	0.944	0.917	0.946	1.04	1.093	1.058	1.137	0.00193455
UPI000003EB21	Lipid III flippase	--	44.959	3.1	1	1	1
UPI0000131D63	NAD(P) transhydrogenase subunit beta	--	48.722	29.4	9	9	37	0.951	0.949	0.987	1.066	1.024	0.986	1.065	0.0714612
UPI000012559D	Alcohol dehydrogenase, propanol-preferring	--	35.379	43.8	9	9	31	1.197	1.162	1.146	0.836	0.863	0.838	0.724	3.92517e-05
UPI0000168023	2-methylcitrate dehydratase	--	53.951	51.6	26	26	87	1.621	1.596	1.58	0.367	0.394	0.39	0.24	4.30492e-07
UPI000013B373	2,3-diketo-L-gulonate TRAP transporter, substrate-binding periplasmic protein	--	35.97	5.8	2	2	2	0.946	0.993	1.077	0.994	0.904	1.098	0.993	0.907606
UPI00001273D7	Carbohydrate diacid regulon transcriptional regulator	--	43.687	12.2	4	4	4	1.083	0.909	1.064	1.025	1.034	0.94	0.981	0.805324
UPI0000138FD2	Glutamate:gamma-aminobutyrate antiporter	--	55.076	15.7	9	9	50	0.878	0.822	0.81	1.21	1.12	1.133	1.38	0.000738864
UPI000013232F	Proline-specific permease ProY	--	50.215	2.8	1	1	2
UPI0000043B8B	UvrABC system protein A	--	103.87	44.1	37	37	74	0.985	0.985	0.976	1.006	1.012	1.052	1.042	0.0459114
UPI00001329E1	Putative PTS system IIB protein subunit of SgaTBA, a putative PTS permease	--	10.896	33.7	2	2	3	0.894	0.979	0.984	0.983	1.049	1.126	1.105	0.117696
UPI000013185E	Negative modulator of initiation of replication	--	58.36	51.1	26	26	97	1.014	0.989	0.976	0.986	1.038	1.015	1.02	0.346577
UPI000018F9E5	6-carboxy-5,6,7,8-tetrahydropterin synthase	--	13.642	34.2	3	3	6	1.083	0.991	1.05	0.932	0.834	1.008	0.888	0.117171
UPI00001B5109	PTS-dependent dihydroxyacetone kinase, dihydroxyacetone-binding subunit dhaK	--	38.215	33.1	9	9	15	0.985	0.958	1	1.027	1.006	1.009	1.034	0.0784409
UPI000013717E	TMAO reductase system periplasmic protein TorT	--	37.864	4.7	2	2	2	0.38	0.789	1.124	1.14	0.683	1.893	1.621	0.320615
UPI000012B55D	L-lactate permease	--	58.919	2.9	1	1	1	1.128	0.963	1.089	0.907	0.954	0.974	0.892	0.0972511
UPI00001129AC	Beta sliding clamp	--	40.586	30.1	10	10	26	0.964	1.013	1.001	0.996	1.006	1.038	1.021	0.347616
UPI0000129430	Flagellar regulator flk	--	36.668	19.3	5	5	5	0.96	1.087	1.141	0.955	0.921	0.922	0.878	0.0723895
UPI000013AC04	5-hydroxyisourate hydrolase	--	15.459	34.3	3	3	4	0.817	0.88	0.928	1.128	1.141	1.117	1.29	0.00239991
UPI000013BEDE	NADPH-dependent 7-cyano-7-deazaguanine reductase	--	32.587	44.3	11	11	24	0.979	1.044	0.985	0.965	1.034	1	0.997	0.922216
UPI000176C118	Glycoprotein/receptor	--	17.221	19.6	3	3	6	1	1.018	0.926	1.014	0.978	1.051	1.034	0.401746
UPI000012B566	GlcG protein	--	13.737	40.3	4	4	26	1.082	1.122	1.043	0.911	0.923	0.948	0.857	0.00306637
UPI0000128CC1	LysR substrate binding domain-containing protein	--	36.15	39.5	11	11	23	1.034	1.009	1.031	0.988	0.954	0.985	0.952	0.0226166
UPI0000128712	Divalent-cation tolerance protein CutA	--	12.331	45.5	3	3	5	0.992	0.946	0.938	1.042	1.064	0.975	1.071	0.095959
UPI000013A9F0	Aldo/keto reductase family protein	--	36.328	14.7	4	4	6	1.056	1.078	1.026	0.889	0.982	0.98	0.902	0.044276
UPI0000132178	Tail-specific protease	--	76.662	35.3	23	23	46	1.048	1.034	1.03	0.931	0.968	0.972	0.923	0.00534737
UPI000013B9B0	Phosphatase NudJ	--	17.433	49	6	6	11	0.983	1.047	0.985	0.995	0.997	1.02	0.999	0.978766
UPI00005F281F	Cellulose synthase subunit	--	127.72	23.2	21	21	33	1.049	1.013	1.076	1.027	0.933	0.924	0.919	0.0882451
UPI000013B03A	7-carboxy-7-deazaguanine synthase	--	25.029	43.5	9	9	12	1.026	0.976	1.019	0.972	0.998	0.998	0.982	0.383824
UPI000013667C	Serine--tRNA ligase	--	48.413	66.3	25	25	88	1.004	1.014	1.004	0.996	0.982	1.006	0.987	0.176595
UPI000012E7CE	Lipoprotein-releasing system transmembrane protein LolC	--	43.263	15.5	5	5	7	0.985	1.018	1.06	1.022	0.93	0.936	0.943	0.185091
UPI000003EAC3	50S ribosomal protein L15	--	14.98	56.2	8	8	45	1.012	1.007	0.985	1.024	1.037	0.941	0.999	0.963998
UPI000013AE1D	Putative cytoplasmic protein	--	10.318	55.3	3	3	10	0.823	0.844	0.837	1.128	1.214	1.098	1.374	0.000511475
UPI0000130D8A	Oligopeptide transport ATP-binding protein OppF	--	37.197	53.3	16	16	32	1.136	1.087	1.081	0.913	0.845	0.91	0.808	0.00197245
UPI00017A9A97	Putative lipoprotein	--	11.969	8.2	1	1	1	0.956	1.032	0.954	1.122	0.974	0.971	1.042	0.501952
UPI000003EB6D	30S ribosomal protein S4	--	23.469	55.8	15	15	93	0.969	1.035	1.003	0.996	1.039	0.994	1.007	0.770917
UPI000013B533	Na+/H+ antiporter	--	60.522	10.9	5	5	6	1.069	1.042	1.028	1.017	0.934	0.992	0.938	0.0792653
UPI000013A993	YdgT	--	8.4165	77.5	6	6	13	0.982	0.998	0.94	1.006	1.03	1.064	1.062	0.0683676
UPI000003EB0C	Acetolactate synthase, isozyme I, small subunit	--	11.106	10.4	1	1	1
UPI000013B52B	PF04237 family protein	--	13.519	55.9	7	7	27	0.953	0.996	0.918	1.038	1.002	1.07	1.085	0.0543494
UPI0000127E05	Nicotinate-nucleotide--dimethylbenzimidazole phosphoribosyltransferase	--	36.987	13.1	3	3	3	1.018	0.975	1.024	0.989	1.045	1.049	1.022	0.429654
UPI000013A927	Predicted DNA-binding transcriptional regulator	--	19.731	20.8	4	4	4	0.987	0.985	1.031	1.002	1.018	0.989	1.002	0.905908
UPI000013B1C9	Putative peptidase	--	37.047	18.7	5	5	5	1.022	1.06	1.008	0.966	0.928	1.028	0.946	0.164992
UPI000012B0AC	Transcriptional regulator GalR	--	37.094	26.5	6	6	9	0.965	0.948	1.08	0.987	0.984	1.01	0.996	0.956815
UPI0000167FF9	L-arabinose isomerase	--	56.073	20.2	7	7	13	1.064	1.052	0.918	0.947	1.047	0.919	0.96	0.55142
UPI000013A9CA	Phosphoenolpyruvate synthase regulatory protein	--	31.211	41.2	10	10	22	1.042	1.052	1.014	0.922	0.929	0.957	0.903	0.00304236
UPI000013BFAC	Toluene ABC transporter, permease protein	--	27.863	9.2	2	2	2	0.92	0.952	0.955	1.09	1.013	1.079	1.126	0.0103258
UPI000012A29C	Ethanolamine utilization protein	--	17.659	11.9	2	2	3	0.948	0.937	0.872	1.09	1.102	1.14	1.209	0.0029606
UPI000003EB53	HlyD family efflux transporter periplasmic adaptor subunit	--	38.828	45.4	16	16	26	1.018	0.99	0.964	1.04	0.984	0.99	1.014	0.584952
UPI00001352DE	Protein Rtn	--	58.587	4.2	2	2	2	0.851	1.005	1.018	1.062	1.041	1.037	1.093	0.189985
UPI000016EF22	Glyoxylate/hydroxypyruvate reductase A	--	35.343	40.4	10	10	15	0.948	1.005	0.978	0.98	0.986	1.037	1.025	0.380516
UPI000012F8F2	Chromosome partition protein MukF	--	50.578	44.8	18	18	43	1.035	1.012	1.035	0.977	0.936	0.99	0.942	0.0315394
UPI000012E473	Elongation factor 4	--	66.57	35.6	19	19	49	0.999	1.004	1.039	0.978	1.003	1.022	0.987	0.507052
UPI000012CB5E	Hypoxanthine phosphoribosyltransferase	--	20.115	48.9	7	7	24	1.007	1.014	1.034	1.003	0.928	0.976	0.952	0.106144
UPI000013B3EF	YigZ family protein	--	21.757	20.6	4	4	5	0.867	1.01	1.204	1.06	0.97	0.904	0.952	0.710778
UPI000013B3AC	Putative transport protein YidE	--	58.938	7.1	4	4	5	1.029	0.928	0.978	1.096	1.015	0.96	1.046	0.409939
UPI0000137448	tRNA modification GTPase TrmE (Fragment)	--	49.23	45.4	18	18	35	1.018	0.982	0.968	1.02	1.021	0.992	1.022	0.285749
UPI0000168163	23S rRNA (uracil(1939)-C(5))-methyltransferase RlmD	--	48.052	21.9	9	9	11	0.953	0.976	1.115	0.979	1.067	0.936	0.98	0.767749
UPI0000126DA9	Transcriptional activator CadC	--	57.812	14.1	6	6	6	0.984	0.966	1.03	1.05	0.98	1.002	1.017	0.56954
UPI0000132127	Paraquat-inducible protein B	--	60.52	37.5	16	16	30	0.999	0.964	1.004	1.064	1.004	0.982	1.028	0.373017
UPI000012626A	Potassium-transporting ATPase ATP-binding subunit	--	72.198	3.7	2	2	2
UPI0000127B0F	Chaperone protein ClpB	--	95.584	64.4	51	51	252	0.834	0.838	0.849	1.166	1.142	1.15	1.372	2.58658e-06
UPI000012F063	Branched-chain amino acid transport system/permease	--	35.55	6	2	2	4	0.958	1.041	0.987	1.09	0.956	1.035	1.032	0.537512
UPI000012C3B8	Acid stress chaperone HdeA	--	11.857	35.5	2	2	7	0.905	0.912	0.79	1.103	1.124	1.13	1.288	0.00569281
UPI000012FFE0	Bacteriophage N4 adsorption protein B	--	85.318	1.7	1	1	1
UPI000013B57F	Putative endoribonuclease	--	14.59	6.1	1	1	1
UPI000000E96C	Citrate synthase	--	48.014	45.7	15	15	141	1.003	0.993	1.005	1.007	0.98	0.994	0.993	0.481327
UPI000013BEEE	Predicted transporter	--	45.099	6.1	2	2	2	0.997	0.861	1.06	1.024	1.002	1.065	1.059	0.395748
UPI000013BF04	UPF0301 protein YqgE	--	20.686	40.1	6	6	13	1.007	1.015	1.016	0.972	0.968	1.002	0.968	0.0456647
UPI0000130028	Na(+)/H(+) antiporter NhaB	--	56.728	8.8	4	4	8	1.005	0.943	1.076	1.019	0.964	1.002	0.987	0.790233
UPI000012CFCD	Protein involved in nickel incorporation into hydrogenase-1 proteins	--	31.43	21.4	4	4	9	0.868	0.919	0.875	1.097	1.128	1.145	1.266	0.000414152
UPI000013AC62	S-formylglutathione hydrolase	--	31.259	23.4	6	6	11	0.968	1.028	1.003	1.006	0.95	0.965	0.974	0.341575
UPI0000683E97	Putative ATP/GTP-binding protein	--	44.984	24.3	7	7	11	0.99	0.994	0.882	0.962	1.057	1.036	1.066	0.254268
UPI0000167D9B	Asparagine--tRNA ligase	--	52.57	47.4	22	22	72	0.986	0.958	0.954	1.054	1.015	1.031	1.07	0.0110759
UPI000013A0CF	Unassigned protein	--	7.2811	63.5	3	3	9	1.09	1.192	1.137	0.761	0.872	0.915	0.745	0.00825652
UPI000013A5CE	Outer membrane lipoprotein, group 4 capsule (G4C) polysaccharide	--	41.74	3.2	1	1	1
UPI000013A9DE	Caffeyl-CoA reductase-Etf complex subunit CarE	--	33.769	4.2	1	1	1	1.04	1.03	0.876	1.071	0.916	1.073	1.039	0.642693
UPI000013B51D	Na/Pi cotransporter family protein	--	59.466	14.4	7	7	8	1.048	1.055	1.044	1.039	0.964	0.91	0.926	0.11031
UPI0001B52D8E	Heme lyase CcmF/NrfE family subunit	--	59.412	2.1	1	1	1
UPI0000110851	Bacterioferritin	--	18.495	29.1	3	3	18	1.035	1.036	1.07	0.982	1.002	0.899	0.918	0.0687346
UPI0000163A3F	YifE protein (Fragment)	--	13.133	51.8	7	7	29	0.976	1.075	1.036	0.96	0.974	1.024	0.958	0.284825
UPI0000133730	Peptide chain release factor 1	--	40.517	39.4	12	12	20	0.972	0.991	0.97	1.046	1.002	0.976	1.031	0.229477
UPI000012A5EE	Protein FdhE	--	34.746	41.1	9	9	29	1.043	1.017	1.004	1.037	0.948	1.015	0.979	0.499562
UPI000012FD90	Sensor protein	--	67.083	32.4	15	14	22	0.991	1.019	0.942	1.034	1.029	1.004	1.039	0.193149
UPI000013A9AC	Anhydro-N-acetylmuramic acid kinase	--	39.496	10	4	4	4	0.886	0.94	0.998	1.127	1.163	1.055	1.184	0.0192904
UPI000012A4CE	Fatty acid oxidation complex subunit alpha	--	79.593	37	26	26	67	1.139	1.135	1.17	0.883	0.835	0.842	0.743	0.000117062
UPI00005EE9D4	Predicted outer membrane biogenesis protein	--	74.457	31.2	21	21	38	1.086	1.123	1.163	0.898	0.84	0.798	0.752	0.00193642
UPI00003775F2	Chromosome partition protein MukE	--	26.974	32.5	7	7	20	0.989	1.052	1.05	0.974	0.952	0.986	0.942	0.0593724
UPI00001358CC	Sugar fermentation stimulation protein A	--	26.228	34.2	7	7	10	1.088	0.933	1.012	0.98	0.951	1.032	0.977	0.685608
UPI000013B42B	Putative membrane protein	--	66.609	31.5	15	15	33	1.092	1.046	1.081	0.981	0.908	0.916	0.871	0.00755105
UPI000012F7E4	Mannitol-1-phosphate 5-dehydrogenase	--	41.139	42.4	15	15	45	0.934	0.9	0.912	1.102	1.115	1.066	1.196	0.000495809
UPI0000128EA6	Succinyl-diaminopimelate desuccinylase	--	41.269	47.5	13	13	22	0.985	1.016	1.03	0.961	0.991	0.995	0.972	0.177868
UPI000013A9FC	4Fe-4S ferredoxin-type domain-containing protein	--	24.125	14.7	2	2	2	1.089	1.061	0.904	0.968	1.022	0.971	0.97	0.670073
UPI000012E79E	Apolipoprotein N-acyltransferase	--	57.065	10.4	5	5	5	1.022	1.06	1.06	1.009	0.97	0.949	0.932	0.0310095
UPI0000112D7A	Aminotransferase	--	43.537	23.9	8	8	27	1.028	1.022	1.039	0.983	0.945	0.966	0.937	0.00619827
UPI000013477E	RNA polymerase sigma factor	--	21.695	44.5	7	7	15	0.91	1.07	1.084	1.006	0.988	1	0.977	0.740966
UPI000012564B	Acetyl esterase	--	36.034	10	2	2	2	0.959	0.916	0.919	1.099	1.009	1.104	1.15	0.0133343
UPI00001377A3	Nucleoid occlusion factor SlmA	--	22.836	36.9	6	6	10	1.108	0.961	1.107	0.98	0.905	0.943	0.89	0.0952666
UPI0000125EBA	Acetylornithine deacetylase	--	42.347	39.7	11	11	26	1.003	1.016	1.016	0.998	0.974	1.028	0.988	0.505435
UPI0000136DF2	Thiazole synthase	--	26.896	26.6	6	6	24	1.097	1.049	1.082	0.913	0.924	0.948	0.863	0.00102919
UPI0000131D61	NAD(P) transhydrogenase subunit alpha	--	54.623	26.5	11	11	30	0.982	0.945	0.965	1.056	1.041	1.024	1.079	0.0058425
UPI000013BEED	Acetyl-CoA C-acetyltransferase family protein	--	41.018	8.4	4	4	4	1.205	1.021	1.15	0.85	0.819	0.972	0.782	0.0265381
UPI00001351EE	Sigma-E factor regulatory protein RseB	--	35.749	29.6	7	7	14	0.884	0.995	0.994	0.968	1.008	1.07	1.06	0.292799
UPI000012741A	CDP-diacylglycerol pyrophosphatase	--	28.45	27.1	6	6	6	1.09	0.986	1.049	1.012	0.964	0.909	0.923	0.133657
UPI00001375B8	Anthranilate synthase component 1	--	57.494	15.6	7	7	9	1.238	1.305	1.233	0.673	0.82	0.76	0.597	0.00100327
UPI0000132327	RNA chaperone ProQ	--	25.892	38.4	8	8	23	0.967	1	1.071	0.98	0.943	1.001	0.962	0.339856
UPI00001B512C	Flap endonuclease Xni	--	28.166	12	3	3	4	1.015	0.937	1.025	0.998	0.977	1.032	1.01	0.761896
UPI00001680D5	Protease 4	--	67.219	23.3	11	11	16	1.046	1.031	1.092	1.002	0.939	0.968	0.918	0.0283045
UPI0000136CE9	Queuine tRNA-ribosyltransferase	--	42.593	48.5	19	19	45	1.011	1.017	1.002	0.982	0.971	0.98	0.968	0.0041945
UPI0000132354	Propionate catabolism operon regulatory protein	--	58.649	5.3	3	3	3
UPI000012E653	Putative ATP-dependent helicase	--	169.38	1.3	2	2	3	0.938	1.01	1.037	1.067	1.016	0.945	1.014	0.778166
UPI000013B0C9	Transcriptional activator TtdR	--	35.314	3.9	1	1	1	0.952	1.161	1.138	0.851	0.88	1.042	0.853	0.14801
UPI000013C47B	Sensor protein zraS	--	51.031	3.4	1	1	1
UPI000013ABB5	Carnitine monooxygenase reductase subunit	--	35.661	11.5	4	4	8	1.413	1.475	1.371	0.617	0.621	0.502	0.409	0.000249388
UPI00016024EC	MATE efflux family protein	--	47.724	1.8	1	1	1	0.966	0.952	1.033	1.034	1.047	0.981	1.038	0.311313
UPI000013BB6A	Putative exported protein	--	9.9473	11.1	1	1	1	1.094	1.155	1.045	0.865	0.862	0.998	0.827	0.0273445
UPI00001328E3	Glucitol/sorbitol-specific enzyme IIB component of PTS	--	33.332	10.3	2	2	3	1.066	0.852	0.788	1.015	1.069	1.215	1.219	0.124896
UPI000013ABB6	Predicted lipoprotein	--	20.921	42	6	6	7	0.901	0.888	0.991	1.184	1.079	0.933	1.15	0.154013
UPI00000DEC7A	YobH domain containing protein	--	8.514	20.3	1	1	1
UPI000013BFBF	PF07369 family protein	--	10.007	16.5	1	1	4	0.948	1.022	0.962	0.897	1.128	1.064	1.054	0.543657
UPI000012CAC5	DNA polymerase III, delta subunit	--	38.703	14	4	4	5	1.046	1.011	1.057	1.036	0.92	1.008	0.952	0.258337
UPI000012BB7D	Glutamate-1-semialdehyde 2,1-aminomutase	--	45.366	37.6	12	12	62	1.017	0.967	1.008	1.008	0.987	1.003	1.002	0.901904
UPI00001260A9	Arsenate reductase	--	15.853	46.8	6	6	8	0.93	0.982	1.083	0.956	0.97	1.088	1.006	0.918023
UPI000013A34C	ABC transporter ATP-binding protein	--	63.132	17.1	8	8	14	1.002	0.99	1.068	0.99	0.973	1.006	0.97	0.307262
UPI00001293EE	DNA-damage-inducible protein J	--	9.4057	32.6	4	4	6	1.047	1.12	0.971	0.941	0.984	0.981	0.926	0.159729
UPI000013ABE8	Carboxy-S-adenosyl-L-methionine synthase	--	27.776	61.1	12	12	25	0.98	1.002	0.995	0.977	1.043	1.008	1.017	0.450989
UPI00000D08B7	Modulator of Rho-dependent transcription termination	--	9.6978	37.2	3	3	9	1.078	0.941	0.996	0.946	1.012	0.946	0.963	0.466671
UPI00001654FF	Ribonuclease G (RNase G) (Cytoplasmic axial filamentprotein)	--	55.364	46	16	16	27	1.012	0.999	1.004	0.969	0.977	1	0.977	0.0840901
UPI0000112353	Fructose-6-phosphate aldolase	--	22.997	17.3	3	3	4	1.026	1.007	0.983	0.975	1.003	1.03	0.997	0.89773
UPI000012A27C	Ethanolamine utilization protein	--	49.599	2.6	1	1	1	0.995	1.026	0.983	0.934	1.022	1.056	1.003	0.971299
UPI000012A742	Iron(3+)-hydroxamate-binding protein fhuD	--	32.998	3	1	1	1	1.124	1.17	1.005	0.772	0.957	0.994	0.825	0.0974351
UPI0000130A0D	NADH-quinone oxidoreductase subunit K	--	10.845	12	1	1	3	1.019	0.922	1.039	1.091	0.95	0.984	1.015	0.805923
UPI00001653E0	Thioredoxin reductase	--	34.623	63.6	14	14	67	0.989	0.967	0.984	1.026	1.018	1.016	1.041	0.00576241
UPI000016818F	2,4-dienoyl-CoA reductase	--	72.677	35.7	20	20	36	1.08	1.076	1.125	0.941	0.899	0.911	0.838	0.000862126
UPI000012B810	Glutamate/aspartate transport ATP-binding protein GltL	--	26.661	30.3	6	6	18	1.149	1.186	1.165	0.8	0.808	0.871	0.708	0.000260559
UPI0000130CF0	Outer membrane protein A	--	37.2	57.5	18	18	168	0.931	0.889	0.99	1.202	1.046	0.954	1.14	0.161391
UPI0000034FD3	DNA polymerase III subunit epsilon	--	27.402	28.5	6	6	8	1.023	1.068	0.992	0.956	0.968	1.007	0.951	0.13055
UPI00001294CA	Site-specific DNA-methyltransferase (adenine-specific)	--	32.099	11.9	4	4	5	0.886	1.045	1.046	0.996	1.039	1.005	1.021	0.696462
UPI000013AE22	Inner membrane protein yfdC	--	34.503	6.8	3	3	3	0.952	1.115	1.162	0.974	0.875	0.938	0.863	0.102007
UPI0000132009	Alkaline phosphatase	--	49.438	16.6	7	7	9	1.099	1.127	1.082	0.872	0.904	0.939	0.821	0.00126655
UPI000012EB5A	4-alpha-glucanotransferase	--	78.503	29.4	17	17	37	1.079	1.127	1.082	0.935	0.894	0.9	0.83	0.000713775
UPI000013A2A9	DUF1428 domain containing protein	--	13.318	43.6	5	5	12	1.162	1.2	1.186	0.801	0.824	0.821	0.689	8.72215e-06
UPI00001338FE	Ribosomal-protein-serine acetyltransferase (Acetylatingenzyme for N-terminal of ribosomal protein L7/L12)	--	20.68	23.5	4	4	6	1.029	0.913	1.134	1.068	0.978	0.886	0.953	0.600724
UPI000013348D	Recombination-associated protein RdgC	--	33.993	34.7	10	10	27	1.02	1.018	0.99	0.984	0.99	0.994	0.98	0.119145
UPI0000131F8D	Spermidine/putrescine import ATP-binding protein PotA	--	43.028	20.4	6	6	13	1.1	0.944	0.988	0.999	1.025	1.087	1.026	0.627438
UPI000013B1EB	RNase E specificity factor CsrD	--	73.338	8.2	6	6	7	1.062	0.986	1.023	0.909	1.025	0.989	0.952	0.29368
UPI000013A370	Mechanosensitive ion channel family protein	--	81.903	10.7	7	7	9	1.114	1.124	1.138	0.907	0.901	0.858	0.79	0.00021944
UPI0000137E71	Putative transporter subunit of ABC superfamily: ATP-binding component	--	72.066	26.8	15	15	27	1.032	1.008	1.02	0.998	0.946	1.009	0.965	0.162826
UPI000013A5C4	Sulfurtransferase	--	12.41	16.5	2	2	5	0.904	0.964	0.96	1.112	0.994	1.074	1.124	0.0406611
UPI00001680B0	Toxin-antitoxin system, toxin component, HipA family	--	49.275	9.3	4	4	5	0.929	0.941	0.976	1.102	1.09	1.115	1.162	0.000745113
UPI000013A377	PKHD-type hydroxylase YbiX	--	25.528	15.1	3	3	4	0.803	0.991	1.04	1.042	1.186	0.956	1.124	0.305822
UPI000039DBA0	UPF0194 membrane protein YbhG	--	36.284	35	10	10	14	1.05	1.01	1.07	1.015	0.953	0.94	0.929	0.0641845
UPI000013A5EF	Probable phosphatase YcdX	--	26.89	41.6	9	9	25	0.982	0.915	0.954	0.989	1.057	1.102	1.104	0.0587385
UPI0000132806	Psp operon transcriptional activator	--	36.986	20.9	6	6	9	1.022	0.996	0.908	0.967	0.994	1.108	1.049	0.43811
UPI000004658B	S-ribosylhomocysteine lyase	--	19.416	78.4	10	10	67	1.063	1.076	1.014	0.955	0.934	0.976	0.909	0.0124003
UPI0000126C78	Cytochrome b561	--	20.286	5.1	1	1	2	1.088	0.998	1.091	1.032	0.829	0.971	0.891	0.173481
UPI000013A0D7	DUF2058 domain-containing protein	--	19.923	26.3	6	6	7	1.013	0.964	0.952	1.017	1.07	0.974	1.045	0.257559
UPI000005E925	Isocitrate dehydrogenase kinase/phosphatase	--	67.698	7.3	3	3	3	0.987	1.03	1.118	1.004	0.916	0.958	0.918	0.133263
UPI000003EB2A	ATP-dependent DNA helicase RecG	--	76.429	13	7	7	10	1.051	0.988	1.021	1.003	0.984	1.05	0.992	0.786718
UPI0000047CA9	Translational regulator CsrA	--	6.8558	31.1	2	2	3	1.539	1.44	1.024	0.588	0.817	0.619	0.506	0.0140038
UPI000013A2E6	Methylase	--	15.529	33.6	2	2	3	1.006	1.05	0.959	0.992	0.974	1.031	0.994	0.866162
UPI000013A0EF	Sec translocon accessory complex subunit YajC	--	11.887	28.2	5	5	23	1.023	1.015	1.044	1.061	0.991	0.921	0.965	0.418284
UPI000003EB2F	Probable transcriptional regulatory protein YeeN	--	25.867	34	6	6	16	0.984	1.034	1.045	0.974	0.964	1	0.959	0.126338
UPI000012841C	DNA-binding response regulator	--	26.125	8.7	2	2	2
UPI000012DD92	Glutathione-regulated potassium-efflux system protein KefC	--	67.795	21.8	13	13	19	1.051	1.098	1.068	0.98	0.918	0.874	0.862	0.0135172
UPI0000128F2F	ATP-dependent RNA helicase DbpA	--	49.187	9.2	4	4	6	1.076	1.128	0.993	0.916	0.817	0.998	0.854	0.0815134
UPI0000125BF2	Protein ApaG	--	13.867	20.8	3	3	4	1.03	1.048	1.018	1.034	0.884	0.994	0.941	0.255606
UPI000013A2B7	Small protein involved in the cell envelope stress response	--	6.0248	18.9	1	1	1	0.877	1.066	0.869	1.027	1.071	1.104	1.139	0.127572
UPI000013A592	30S ribosomal protein S12 methylthiotransferase accessory protein YcaO	--	65.651	29.2	11	11	19	1.086	1.08	1.104	0.924	0.915	0.935	0.848	5.48343e-05
UPI0000110F5D	Sulfur carrier protein TusA (Fragment)	--	9.0945	85.2	5	5	11	1.006	1.006	0.975	1.014	0.963	1.023	1.004	0.858394
UPI00001314F5	4-hydroxythreonine-4-phosphate dehydrogenase	--	35.113	21	4	4	8	1.052	0.992	1.009	0.981	1.031	1.009	0.99	0.668409
UPI0000112215	H(+)/Cl(-) exchange transporter ClcA	--	50.348	10.6	3	3	5	1.026	0.974	1.007	1.037	0.977	0.962	0.99	0.717858
UPI0000129E49	Anti-adapter protein IraM	--	12.133	13.1	2	2	2	1.101	1.056	1.214	0.883	0.896	0.868	0.785	0.00476015
UPI000013769B	tRNA pseudouridine synthase B	--	35.087	37.3	10	10	16	1.01	1.031	1.015	0.99	0.981	0.96	0.959	0.0192794
UPI0000125CB2	HTH-type transcriptional regulator AppY	--	28.763	19.7	6	6	10	0.992	0.991	1.006	0.998	1.036	1.029	1.025	0.122712
UPI000013570C	Serine transporter	--	46.906	2.8	1	1	2	1.566	1.159	1.343	0.689	0.511	0.748	0.479	0.00686568
UPI00001311A1	3-hydroxyacyl-CoA dehydrogenase PaaC	--	51.732	20	7	7	11	1.227	1.164	1.305	0.754	0.762	0.747	0.612	0.000128152
UPI000013B0B6	L-glyceraldehyde 3-phosphate reductase	--	38.832	39.3	11	11	21	1.015	1.045	1.017	0.993	0.975	0.972	0.955	0.016847
UPI0000111770	Molybdenum cofactor guanylyltransferase	--	21.643	17.5	4	4	4	1.061	0.956	0.95	0.905	1.128	0.985	1.017	0.856203
UPI000012D04A	Carbamoyltransferase HypF	--	82.065	6.9	5	4	5	1.003	0.988	0.925	0.943	1.022	1.146	1.067	0.371537
UPI0000137AF4	sn-glycerol-3-phosphate import ATP-binding protein UgpC	--	39.523	24.2	8	8	17	1.172	1.117	1.105	0.829	0.876	0.878	0.761	0.000469686
UPI000013AE1C	3-ketoacyl-CoA thiolase	--	46.53	24.8	9	9	15	1.118	1.073	1.066	0.92	0.92	0.897	0.84	0.000531271
UPI0000168145	Holo-[acyl-carrier-protein] synthase	--	14.052	22.2	3	3	4	0.964	1.038	1	0.978	1.027	1.008	1.004	0.886264
UPI000013A5C8	Inner membrane protein yccS	--	81.667	4.7	3	3	4	1.053	0.999	0.801	1.087	1.1	0.966	1.105	0.323717
UPI0000137991	3-octaprenyl-4-hydroxybenzoate carboxy-lyase	--	55.603	36	16	16	37	0.996	1.001	1.056	0.977	0.96	1.013	0.966	0.235184
UPI00001654E4	D-erythrose-4-phosphate dehydrogenase	--	37.299	41.9	14	14	30	1.094	1.026	1.046	0.955	0.989	0.92	0.905	0.0237377
UPI000013B299	Cyclic-di-GMP phosphodiesterase	--	73.08	15.8	9	9	11	0.988	1.08	1.042	0.999	0.973	0.951	0.94	0.105424
UPI00001260F0	Transcriptional regulator	--	36.813	16.4	5	5	6	1.097	1.137	0.984	0.933	0.951	0.941	0.878	0.0427432
UPI00001131AE	Glucose-1-phosphate thymidylyltransferase	--	32.693	30	7	5	20	1.044	1.056	1.049	0.961	0.98	0.985	0.929	0.000864268
UPI0000126F3C	Carbamoyl-phosphate synthase small chain	--	41.431	45.5	11	11	21	1	1.024	1.005	1.013	0.994	0.999	0.992	0.453956
UPI000013A694	Protein YcgL	--	12.414	47.2	7	7	21	0.996	1.015	0.98	1.022	0.954	1.021	1.002	0.952187
UPI00000480C2	Inosine-5'-monophosphate dehydrogenase	--	52.022	47.1	18	18	68	1.045	1.018	1.019	0.984	0.973	0.969	0.949	0.00592949
UPI000013B6EA	Putative oxidoreductase	--	26.004	57.7	11	11	37	0.966	0.992	0.975	1.03	1.006	1.055	1.054	0.0294719
UPI0000125EF5	Argininosuccinate lyase	--	50.318	35	12	12	19	1.083	1.047	1.022	0.944	0.927	0.988	0.907	0.0182427
UPI0000168172	Glycine dehydrogenase (decarboxylating)	--	104.38	51.3	36	36	129	0.996	1.004	0.982	1.016	1.008	1.018	1.02	0.0491897
UPI0000168182	Malate synthase G	--	80.488	51.2	32	32	176	1.09	1.086	1.096	0.916	0.902	0.918	0.836	8.25983e-06
UPI000012BE82	DNA gyrase subunit A	--	96.962	41	35	35	95	0.982	0.984	0.989	1.008	1.038	1.01	1.034	0.0258761
UPI0000126B29	Corrinoid adenosyltransferase	--	21.999	26	6	6	7	0.977	1.033	1.086	0.952	0.99	1.018	0.956	0.28768
UPI0000168250	Ribosomal RNA small subunit methyltransferase C	--	37.624	40.5	12	12	22	0.991	0.993	1.05	0.991	0.997	0.96	0.972	0.269682
UPI000013A9F5	Zinc-binding dehydrogenase family protein	--	38.731	4.2	1	1	1	1.105	0.86	1.178	1.147	0.907	0.804	0.909	0.530832
UPI000012985B	Phosphatidylserine decarboxylase proenzyme	--	35.934	35.4	9	9	28	1.08	0.995	1.011	1.052	0.943	0.932	0.948	0.307444
UPI0000137179	TorCAD operon transcriptional regulatory protein torR	--	26.233	15.2	3	3	4	1.074	1.095	1.045	0.994	0.776	1.026	0.87	0.175836
UPI00000DEB2C	UPF0509 protein YciZ	--	6.4413	33.3	3	3	3	1.018	1.032	1.035	0.98	0.966	0.982	0.949	0.00198395
UPI00000000D1	6,7-dimethyl-8-ribityllumazine synthase	--	16.156	31.4	4	4	21	1.06	1.005	1.02	0.992	0.963	0.979	0.951	0.0503039
UPI000013BF95	Penicillin-binding protein activator LpoA	--	72.824	33.6	18	18	33	0.852	0.902	0.918	1.172	1.104	1.044	1.243	0.00578385
UPI0000168113	Nucleoid-associated protein YejK	--	37.822	41.2	10	10	26	0.993	0.987	1	1.018	1.027	0.943	1.003	0.94612
UPI000013A5F0	Cytoplasmic chaperone TorD family protein	--	20.724	26.1	4	4	8	1.052	1.024	0.98	0.969	1.054	0.964	0.977	0.548677
UPI0000000A4D	Outer membrane protein assembly factor BamA	--	90.552	48.6	35	35	91	1.004	0.968	1	1.124	0.996	0.921	1.023	0.755461
UPI0000137412	tRNA (guanine-N(1)-)-methyltransferase	--	28.422	35.7	7	7	10	0.96	1.052	0.991	1.013	0.91	1.058	0.993	0.876922
UPI0000673C0D	PTS-dependent dihydroxyacetone kinase, phosphotransferase subunit dhaM	--	51.448	26.5	10	10	17	0.932	0.95	0.952	1.045	1.038	1.068	1.112	0.000633684
UPI0000136D76	Thioredoxin	--	15.555	51.1	7	7	24	0.946	0.972	0.928	1.058	1.035	1.047	1.103	0.00269308
UPI0000129B85	Entericidin B	--	4.8095	39.6	1	1	20	1.172	1.066	1.105	0.979	0.88	0.79	0.792	0.0254255
UPI000013640D	Phenylalanine--tRNA ligase alpha subunit	--	36.831	59.9	18	18	59	1.022	1.044	0.992	0.962	0.992	0.981	0.96	0.0775027
UPI0000111D8F	Integration host factor subunit alpha	--	11.354	59.6	7	7	26	1.009	1.016	0.996	0.961	1.044	1.015	1	0.973436
UPI000013A6E6	Bacterial regulatory s, lacI family protein	--	36.134	21.1	5	5	8	1.029	0.99	0.949	1.03	1.055	1.001	1.04	0.23132
UPI00001680CA	Phospho-2-dehydro-3-deoxyheptonate aldolase	--	38.735	27.6	9	9	16	1.001	0.965	1.04	1.051	0.981	0.992	1.006	0.853617
UPI000003EB35	Succinylglutamate desuccinylase	--	35.8	21.1	6	6	13	1.349	1.324	1.261	0.737	0.568	0.642	0.495	0.000808886
UPI000012DE19	Homoserine kinase	--	33.623	15.5	6	6	10	1.258	1.272	1.272	0.747	0.755	0.781	0.6	3.30455e-06
UPI00001288E3	Ni/Fe-hydrogenase B-type cytochrome subunit	--	27.597	10.2	2	2	2	0.813	0.763	0.888	1.263	1.123	1.149	1.435	0.00312624
UPI000003EB57	Sensory histidine kinase in two-component regulatory system with DcuR, regulator of anaerobic fumarate respiration	--	60.55	6.8	4	4	4
UPI000013ABA1	Putative oxidoreductase	--	30.986	9.9	3	3	3	0.882	0.96	1.075	0.985	1.065	1.021	1.053	0.428349
UPI000013A95E	Protein ydeP	--	83.494	3	2	2	2	0.976	0.985	0.94	1.016	1.015	1.078	1.072	0.048001
UPI0000126E0D	L-carnitine CoA-transferase	--	45.126	3.5	1	1	3	1.015	1.042	1.029	1.003	0.933	0.991	0.948	0.0869455
UPI000012EB9D	NADP-dependent malic enzyme	--	82.416	41.4	29	29	77	0.972	0.968	0.953	1.031	1.064	1.056	1.089	0.00161221
UPI000013AC6D	CobW/HypB/UreG, nucleotide-binding domain protein	--	36.113	27.4	9	9	10	0.99	1.026	1.013	0.944	0.99	0.964	0.957	0.0624668
UPI000016396D	Acetyl-coenzyme A carboxylase carboxyl transferase subunit alpha	--	35.241	56.7	19	19	60	1.043	1.044	1.017	0.957	0.976	0.953	0.93	0.00298447
UPI000012EF98	Inner membrane transporter	--	23.256	13.4	2	2	2	1.248	0.725	0.943	0.887	1.322	0.883	1.06	0.769938
UPI000012AC44	Phosphoenolpyruvate-dependent sugar phosphotransferase system, EIIA 2 family protein	--	65.999	1.2	1	1	1	1.076	1.024	1.015	0.947	0.893	1.057	0.93	0.229014
UPI0000030AA1	8-amino-7-oxononanoate synthase	--	41.594	7.6	3	3	3	1.061	0.944	1.096	0.948	0.976	0.988	0.939	0.263759
UPI000003EB62	UDP-N-acetylmuramoyl-tripeptide--D-alanyl-D-alanine ligase	--	47.447	25.4	9	9	15	0.949	0.994	0.97	1.029	1.019	1.004	1.048	0.0368975
UPI0000E8AB83	Long-chain fatty acid transport protein	--	48.541	22.2	7	7	21	1.072	1.088	1.162	0.975	0.89	0.805	0.804	0.0218829
UPI000012BE00	Glucanase	--	41.7	25	9	9	17	1.088	1.056	1.03	0.889	0.945	0.965	0.882	0.0125595
UPI000012FD01	N-acetylglucosamine-6-phosphate deacetylase	--	40.949	52.9	15	15	49	0.984	0.988	0.973	1.043	0.995	1.038	1.044	0.0504516
UPI000012A64B	Putative ferric enterobactin transport protein	--	42.099	5.6	2	2	5	1.377	1.432	1.553	0.612	0.487	0.52	0.371	0.000203046
UPI0000047C6E	Protein visC	--	44.244	15.5	6	6	11	0.961	1.015	0.99	1.029	1.012	1.053	1.043	0.0961411
UPI000013B5D2	ThrE domain-containing protein	--	28.001	3.5	1	1	1	0.969	0.83	0.918	1.036	1.154	1.102	1.212	0.0248064
UPI0000131F9A	Putrescine-binding periplasmic protein	--	38.867	46.6	16	16	51	0.992	1.03	0.943	0.984	1.01	1.052	1.027	0.44441
UPI000012C338	3-phenylpropionate/cinnamic acid dioxygenase subunit alpha	--	51.109	60.9	25	25	80	0.202	0.268	0.284	1.672	1.554	1.602	6.403	6.41864e-05
UPI0000137634	PHP domain protein	--	32.58	17.4	4	4	6	1.042	0.994	1.087	0.923	0.975	1.04	0.941	0.226138
UPI000013A0FB	Putative transporter	--	48.809	6.2	2	2	2	1.019	0.936	1.035	0.993	1.032	0.997	1.011	0.749812
UPI000013B3CD	ATPase RavA	--	56.388	32.9	16	16	23	1.042	1.018	1.004	0.959	1.038	0.958	0.964	0.268688
UPI000013AC76	ABC transporter, permease protein	--	40.36	12.6	4	4	4	1.073	1.047	1.094	0.962	0.982	0.868	0.875	0.0284795
UPI000003EADE	30S ribosomal protein S17	--	9.7043	40.5	4	4	14	1.028	1.02	0.994	0.981	0.994	0.988	0.974	0.0730205
UPI0000137173	Trimethylamine N-oxide (TMAO) reductase I, catalytic subunit	--	94.455	45.9	30	30	88	0.195	0.226	0.234	1.673	1.662	1.713	7.707	3.51062e-06
UPI0000047C91	Cellulose synthase operon protein YhjU	--	62.031	15.2	7	7	10	1.161	1.028	1.098	0.942	0.886	0.91	0.833	0.00990489
UPI000016822C	3'(2'),5'-bisphosphate nucleotidase CysQ	--	27.176	51.6	10	10	38	0.996	1.019	0.956	0.967	1.025	1.002	1.008	0.773298
UPI0000047C6D	Predicted 4Fe-4S cluster-containing protein	--	9.7912	29.1	2	2	2	1.021	0.976	1.054	0.975	0.91	1.074	0.97	0.57343
UPI0000137E5A	Universal stress protein B	--	13.027	21.6	1	1	1	1.08	0.965	0.811	0.904	1.117	1.136	1.105	0.411386
UPI000000E96F	UvrABC system protein C	--	68.187	25.7	14	14	19	0.979	0.972	1.054	1.03	1.03	0.979	1.011	0.725728
UPI000013A2FB	Ribosomal RNA large subunit methyltransferase H	--	17.341	35.5	4	4	5	0.977	1.018	1.184	0.804	1.01	1.026	0.893	0.304844
UPI000012FD4F	N-acetylmannosamine kinase	--	29.644	32	6	6	9	0.853	0.943	1.022	0.993	1.089	1.028	1.104	0.162333
UPI0000131398	Penicillin-binding protein 1A	--	93.635	26.9	19	19	28	1.032	1.058	1.002	0.98	0.966	0.985	0.948	0.0336328
UPI000003EB02	Lysine--tRNA ligase	--	57.603	64.6	34	23	118	1	0.96	1.005	1.046	1.002	1.034	1.039	0.116159
UPI00001680AD	Oxygen sensor protein DosP	--	91.202	2.9	2	2	2
UPI000011304B	GrxB family glutaredoxin	--	24.35	60.5	13	13	49	1.039	1.051	1.054	0.97	0.943	0.931	0.905	0.00146438
UPI00000D0383	Peptidase, M23 family	--	47.466	27.6	10	10	15	1.004	0.936	0.986	0.978	0.964	1.043	1.02	0.570083
UPI0000138FDB	Xanthine dehydrogenase iron-sulfur-binding subunit	--	16.922	10.1	2	2	3	1.032	0.941	1.074	0.993	1.013	0.958	0.973	0.567944
UPI000013ABDB	SEC-C domain protein	--	25.039	31.2	7	5	18	0.948	1.013	0.98	1.004	1.034	1.018	1.039	0.138774
UPI000013AE4F	N-acetylmuramic acid 6-phosphate etherase	--	31.22	34.9	9	9	15	1.01	0.988	0.998	0.974	1.02	1.01	1.003	0.87844
UPI00001B5141	Molybdopterin oxidoreductase Fe4S4 domain protein	--	21.368	51.8	8	7	31	1.055	1.022	1.074	0.95	0.987	0.905	0.902	0.0232819
UPI00001586B9	Exodeoxyribonuclease 7 small subunit	--	8.9518	56.2	4	4	10	1.132	0.991	1.072	0.914	0.988	0.944	0.891	0.0623568
UPI0000168062	Nicotinate phosphoribosyltransferase	--	45.897	24	8	8	11	1.077	1.186	1.069	0.886	0.842	0.943	0.802	0.00915895
UPI0000165544	Met repressor	--	12.141	41.9	4	4	10	0.948	1.022	0.916	1.048	1.052	1.053	1.093	0.0505275
UPI000012FD54	Sialic acid transporter NanT	--	53.551	7.9	4	4	4	1.129	1.167	1.247	0.847	0.796	0.882	0.713	0.00125602
UPI000013A5FF	UPF0176 protein YceA	--	39.781	22	6	6	6	1.134	1.158	1.148	0.982	0.682	0.899	0.745	0.0497147
UPI000006147B	tRNA/tmRNA (uracil-C(5))-methyltransferase	--	41.966	44	13	13	22	1.048	1.014	1.02	1	0.94	0.963	0.942	0.0438763
UPI000012F6A4	tRNA (guanine-N(7)-)-methyltransferase	--	27.307	48.5	9	9	19	0.983	1.038	1.038	0.97	1	1.05	0.987	0.679955
UPI0000049419	Beta-galactosidase	--	116.48	14.8	15	15	22	0.972	0.935	1.039	1.043	1.034	1.038	1.057	0.14027
UPI000003EB20	dTDP-4-amino-4,6-dideoxygalactose transaminase	--	41.901	24.5	7	7	15	1.02	1.03	1.022	0.968	1	0.964	0.954	0.017433
UPI000012A27E	Ethanolamine ammonia-lyase, large subunit	--	49.403	39.3	15	15	29	0.91	0.944	0.972	1.061	1.047	1.046	1.116	0.00494037
UPI000012F5D9	Lipid A biosynthesis myristoyltransferase	--	37.41	21.7	7	7	9	1.002	0.993	1.062	1.018	0.992	0.936	0.964	0.317431
UPI000013B542	Putative arylsulfatase	--	61.666	13.7	7	7	17	1.044	1.031	1.041	1.032	0.94	0.899	0.921	0.110161
UPI00001319A4	Protein PhnO	--	16.57	21.5	3	3	4
UPI0000126116	Aspartate--ammonia ligase	--	36.65	44.8	12	12	40	1.01	1.036	0.974	0.995	0.984	1.029	0.996	0.872067
UPI00001681BF	Leucine transporter subunit periplasmic-binding component of ABC superfamily	--	39.378	8.9	3	3	4	1.094	1.049	1.073	0.948	0.899	0.991	0.882	0.0148742
UPI000012EB51	Maltose regulon regulatory protein malI	--	36.624	4.4	2	2	2
UPI0000136447	Phenylalanine--tRNA ligase beta subunit	--	87.377	45.8	35	35	85	1.012	1.01	1.017	0.994	1.001	0.992	0.983	0.00725912
UPI000013ADD2	UDP-4-amino-4-deoxy-L-arabinose--oxoglutarate aminotransferase	--	41.649	23.5	7	7	19	1.045	1.193	1.104	0.859	0.842	0.903	0.779	0.00472009
UPI00001681DA	Truncated inactive ribonuclease PH	--	24.425	24.1	4	4	10	1.051	1.072	1.031	0.915	0.966	0.984	0.908	0.0171242
UPI0000132B1E	N5-carboxyaminoimidazole ribonucleotide synthase	--	39.461	9.6	3	3	4	1.046	0.992	1.12	0.962	0.946	0.984	0.916	0.0783079
UPI000012DD31	Pectin degradation repressor protein kdgR	--	30.029	62.4	16	16	35	0.981	1.006	1.01	0.998	0.98	1.02	1	0.985602
UPI0000128714	Lipoprotein involved with copper homeostasis and adhesion	--	25.844	33.9	7	7	11	0.946	0.878	0.922	1.176	1.077	0.977	1.176	0.0505609
UPI0000163A30	50S ribosomal protein L28	--	9.0064	55.1	7	7	18	0.89	0.893	1.03	1.142	1.069	0.891	1.103	0.344479
UPI0000126E09	Crotonobetainyl-CoA reductase	--	42.558	6.1	3	3	3	0.863	0.958	0.965	1.15	1.058	1.013	1.156	0.0489756
UPI00001278B2	Endoribonuclease toxin ChpB	--	12.492	18.1	1	1	2	0.938	1.019	1.05	0.977	0.998	1.034	1.001	0.969682
UPI0000163982	LexA regulated protein	--	11.28	26.8	2	2	5	1.035	1.022	1.072	0.828	0.989	1.074	0.924	0.338974
UPI00001327F5	DNA-binding transcriptional regulator of psp operon	--	8.763	33.8	2	2	4	1.02	0.802	0.847	1.149	0.996	1.021	1.186	0.11005
UPI000013B6EC	LUD_dom domain-containing protein	--	25.212	53.2	11	11	24	0.945	0.994	0.923	0.996	1.044	1.051	1.08	0.0492144
UPI0000156360	DNA polymerase	--	90.051	5.4	4	4	5	1.022	0.974	1.023	1.065	0.938	0.987	0.99	0.80269
UPI000013AE4E	HTH-type transcriptional regulator MurR	--	31.191	4.9	1	1	1	0.988	1.004	1.076	0.862	0.936	1.152	0.962	0.636053
UPI000011F0D1	Tryptophan synthase alpha chain	--	28.724	48.9	11	11	21	1.119	1.083	1.112	0.858	0.874	0.938	0.806	0.00170361
UPI0000130120	Iron-sulfur cluster assembly scaffold protein IscU	--	13.848	75.8	7	7	36	0.887	0.942	0.874	1.098	1.092	1.134	1.23	0.00129733
UPI000012EE79	Glucans biosynthesis protein C	--	44.69	2.1	1	1	1	1.105	1.06	1.078	0.839	1.094	0.844	0.856	0.138979
UPI0000673E64	Transcriptional regulator, IclR family	--	31.322	10.1	3	3	5	1.069	0.946	0.989	0.919	1.033	0.978	0.975	0.640485
UPI00000480B6	Biotin carboxyl carrier protein of acetyl-CoA carboxylase	--	16.687	28.2	4	4	13	0.94	1.023	1.026	0.991	0.996	1.018	1.005	0.848472
UPI000013A58B	Putative DNA recombination-associated ATPase RarA	--	49.626	24.4	9	9	13	1.126	1.066	1.117	0.925	0.91	0.904	0.828	0.000507105
UPI000016813C	Phosphoribosylformylglycinamidine cyclo-ligase	--	36.854	24.6	7	7	15	1.111	1.02	0.99	1.007	0.99	0.944	0.942	0.213145
UPI00001272EA	Cytochrome c-type biogenesis protein	--	39.089	23.4	7	7	13	0.986	1.076	1	0.99	0.94	0.957	0.943	0.133409
UPI000013B369	HTH-type transcriptional regulator yiaJ	--	31.066	31.2	7	7	9	0.984	0.968	1.194	0.87	0.955	1.068	0.92	0.408785
UPI000013B04A	Putative oxidoreductase	--	28.042	6.1	2	2	2	1.091	1.124	1.045	0.889	0.833	1.034	0.845	0.0635994
UPI00000DE6FA	3-isopropylmalate dehydratase large subunit	--	49.881	20	8	8	10	1.034	1.082	1.118	0.897	0.98	0.905	0.86	0.0139601
UPI000013B3F3	Protein YihD	--	10.273	40.4	4	4	12	0.957	0.948	0.959	1.052	1.072	1.017	1.097	0.00432745
UPI000013A392	Unassigned protein	--	18.991	40.4	5	5	11	0.967	0.953	1.034	1.109	0.982	0.918	1.019	0.805256
UPI000018F714	DNA_binding_1 domain-containing protein	--	11.488	18.4	2	2	2	0.997	1.018	0.99	0.956	0.98	1.073	1.001	0.99672
UPI000013621D	Ribosomal RNA small subunit methyltransferase B	--	48.347	28.2	9	9	22	1.015	1.041	1.039	0.99	0.965	0.931	0.932	0.0231202
UPI000013A35F	ABC-2 type transporter	--	42.059	4	1	1	1		0.933	1.841	0.607	0.666		0.459	0.169452
UPI0000683E99	Protein YicN	--	17.219	16.7	2	2	2	0.99	1.029	1.036	1.023	0.996	0.941	0.969	0.323025
UPI000013B556	KamA family protein	--	38.749	10.5	4	4	5	0.91	0.97	1.108	0.957	1.054	0.954	0.992	0.939114
UPI000003EAFC	Respiratory nitrate reductase 2 gamma chain	--	26.018	8	2	1	4	1.282	1.215	1.28	0.728	0.812	0.708	0.595	0.000330447
UPI000003EB6C	DNA-directed RNA polymerase subunit alpha	--	36.511	66.6	20	20	75	1.028	1.023	1.018	0.981	0.97	1.005	0.963	0.0255052
UPI00001108FE	Bifunctional ligase/repressor BirA	--	35.312	22.4	7	7	9	1.032	0.964	0.969	0.997	0.962	1.031	1.008	0.789182
UPI0000001328	Putative multidrug resistance protein MdtD	--	50.9	2.8	1	1	1
UPI000012EEE0	1,4-dihydroxy-2-naphthoate octaprenyltransferase	--	33.594	4.9	2	2	2	0.919	1.058	1.211	1.09	0.893	0.842	0.886	0.339915
UPI000003EB41	Glycerol-3-phosphate dehydrogenase, anaerobic, C subunit	--	44.108	42.9	18	18	33	1.03	1.01	1.087	0.943	0.939	0.956	0.908	0.0129843
UPI0000047CA1	E14 prophage SAM-dependent methyltransferase	--	25.147	3.2	1	1	1	1.09	0.928	1.087	1.081	0.847	0.971	0.934	0.467822
UPI0000132078	Peptidylprolyl isomerase	--	68.149	56.2	28	28	117	1.032	1.014	1.042	1.007	0.958	0.96	0.947	0.0399028
UPI000013A5B4	6-N-hydroxylaminopurine detoxification oxidoreductase	--	40.644	35.5	10	10	18	1.014	0.978	1.015	0.992	0.988	0.995	0.989	0.442196
UPI000012597E	N-acetylmuramoyl-L-alanine amidase	--	45.634	24.9	8	8	11	1.02	1.021	1.005	0.926	1.003	1.063	0.982	0.65467
UPI000013B06E	D-phenylhydantoinase	--	51.025	21.5	7	7	8	1.054	1.041	1.094	1.002	0.897	0.934	0.888	0.0286569
UPI000012AFB6	Succinate-semialdehyde dehydrogenase [NADP+] GabD	--	51.719	38.2	19	19	67	1.319	1.305	1.312	0.691	0.681	0.708	0.528	6.89446e-07
UPI0000111626	Cytochrome bo(3) ubiquinol oxidase subunit 3	--	22.622	11.8	1	1	4	1	0.817	0.677	0.984	1.363	0.99	1.338	0.134225
UPI0000110629	4-hydroxy-tetrahydrodipicolinate reductase	--	28.756	52.4	12	12	28	1.002	0.998	1.004	1.018	0.978	1.016	1.003	0.859014
UPI0000128EB0	Diaminopimelate epimerase	--	30.208	30.7	6	6	14	1	1.044	0.996	1.016	0.958	1.01	0.982	0.479182
UPI0000032AA9	Outer membrane protein F	--	39.333	28.2	10	9	40	1.214	1.121	1.239	0.908	0.766	0.701	0.665	0.00720748
UPI000013A024	Cell division protein ZapD	--	28.291	41.3	10	10	24	0.98	1.03	0.973	1	0.98	1.021	1.006	0.787047
UPI000003EB75	Bifunctional protein HldE	--	51.05	48	20	20	61	1	1.017	0.974	0.972	0.995	1.001	0.992	0.646626
UPI000013A5CA	UPF0319 protein YccT	--	24.594	9.5	2	2	2	1.334	1.58	1.333	0.74	0.328	0.709	0.418	0.0262107
UPI00001653C3	N5-carboxyaminoimidazole ribonucleotide mutase	--	17.78	26	3	3	6	1.053	1.063	0.948	1.008	0.927	1.017	0.963	0.47851
UPI0000110FFC	Chemotaxis regulator transmitting signal to flagellar motor component	--	14.097	22.5	2	2	5	1.422	1.418	1.415	0.566	0.608	0.603	0.418	2.7007e-06
UPI00001119F5	Porphobilinogen deaminase	--	33.851	49.8	13	13	25	1.025	0.954	0.985	0.983	1.012	1.053	1.028	0.386089
UPI00000D069E	Predicted transporter	--	50.398	3.9	2	2	3	1.123	1.112	1.001	0.917	0.95	0.912	0.859	0.0178834
UPI0000046A61	Chorismate pyruvate-lyase	--	18.777	29.7	5	5	7	0.979	1.035	0.822	1.05	1.235	1.075	1.185	0.116372
UPI000012CCDD	Co-chaperone protein HscB	--	20.137	25.1	3	3	7	0.946	0.959	0.962	1.066	1.09	1.007	1.103	0.0154928
UPI0000134562	RNA polymerase sigma factor RpoH	--	32.468	5.6	2	2	2
UPI000013BDB0	Uncharacterized HTH-type transcriptional regulator ypdC	--	32.355	3.2	1	1	1
UPI00001681F4	5-methyltetrahydropteroyltriglutamate--homocysteine methyltransferase	--	84.672	17.5	14	14	20	0.758	0.718	0.704	1.228	1.34	1.252	1.752	8.36454e-05
UPI000013A397	DUF535 domain-containing protein	--	38.357	20.3	7	7	8	0.808	0.929	0.86	1.178	1.02	1.172	1.298	0.0138312
UPI0000125ECA	Arginine repressor	--	16.994	53.2	5	5	14	0.976	1.006	0.934	0.983	1.054	1.028	1.051	0.168121
UPI0000128CBA	Sulfate/thiosulfate import ATP-binding protein CysA	--	41.058	7.1	2	2	2	0.629	0.75	0.725	1.359	1.288	1.247	1.851	0.00048392
UPI00001335C6	Recombination protein RecR	--	21.963	41.3	6	6	13	1.091	1.051	0.956	0.945	0.965	0.994	0.937	0.205594
UPI00001309D6	NADH-quinone oxidoreductase subunit B	--	25.056	46.4	10	10	37	1.016	0.998	1.008	0.98	1.006	0.987	0.984	0.155415
UPI000012C692	GTPase HflX	--	48.327	45.3	18	18	36	1.017	0.986	1.06	0.981	0.996	0.96	0.959	0.151173
UPI0000042A94	LexA repressor	--	22.357	55.4	10	10	23	1.032	1.025	0.96	0.968	1.036	1.038	1.008	0.812188
UPI000011098F	Biotin carboxylase	--	49.32	55.5	23	23	115	0.998	0.99	0.998	1.007	1.008	1.006	1.012	0.013155
UPI000013ABAB	YbaK/prolyl-tRNA synthetase domain-containing protein	--	17.85	44.9	7	7	10	1	0.977	0.983	1.002	1.016	1.026	1.028	0.0458619
UPI000016F092	DUF21 domain-containing protein	--	46.351	17.7	6	6	7	0.904	0.851	1.178	0.725	1.302	1.068	1.055	0.866901
UPI00005EEC3A	GNAT family N-acetyltransferase	--	35.337	42.5	10	10	19	0.983	0.967	0.975	1.049	1.029	1.031	1.063	0.00140097
UPI0000131B2A	Phosphate transporter	--	53.388	16.4	5	5	9	1.125	1.084	1.154	0.955	0.932	0.831	0.808	0.00999792
UPI000003EAF3	ATP synthase gamma chain	--	31.577	66.6	19	19	73	1.03	1.036	1.01	0.969	0.982	0.972	0.95	0.00419891
UPI000000E7A9	Predicted DNA-binding transcriptional regulator	--	26.079	18.3	4	4	9	0.984	0.972	0.954	0.948	1.08	1.129	1.085	0.212527
UPI000013A603	Lipoprotein yceB	--	20.5	38.7	6	6	13	1.023	0.968	0.982	1.027	0.978	0.948	0.993	0.818075
UPI000012CBCE	ATP-dependent helicase HrpA	--	149.03	36.4	41	41	56	1.014	0.967	0.995	1.003	1.008	1.017	1.017	0.290538
UPI000012A4A9	3-hydroxyacyl-[acyl-carrier-protein] dehydratase FabZ	--	17.033	62.9	7	7	37	0.942	1.006	1.002	1.049	0.997	1.009	1.036	0.250932
UPI00015C4D32	Lactaldehyde reductase	--	40.513	47.9	14	14	31	0.98	0.918	0.909	1.066	1.084	1.058	1.143	0.00556392
UPI0000112FF5	ATP-dependent protease ATPase subunit HslU	--	49.593	55.8	24	24	82	0.968	0.95	0.935	1.038	1.046	1.062	1.103	0.00125877
UPI0001505B94	tRNA-specific adenosine deaminase	--	18.717	34.1	6	6	8	1.086	0.963	1.023	0.936	0.98	0.998	0.949	0.259714
UPI000013A367	Malate/L-lactate dehydrogenase	--	38.897	23	4	4	10	0.982	0.95	1.019	1.076	1.059	0.979	1.055	0.207826
UPI000016821F	DNA-binding transcriptional regulator BasR	--	25.031	19.4	3	3	8	1.054	1.088	1.047	0.913	1.024	0.86	0.877	0.0637856
UPI0000168006	Deoxyguanosinetriphosphate triphosphohydrolase	--	59.382	20.6	9	9	16	0.979	1.024	1.042	0.987	1.022	0.983	0.983	0.479714
UPI00001259E3	Protein AmpE	--	32.122	13.4	3	3	5	1.147	0.998	0.962	0.904	0.9	0.994	0.901	0.175578
UPI000013BDAE	Predicted sensory kinase in two-component system with YpdB	--	62.657	4.8	3	3	4	1.011	1.137	1.028	0.94	0.902	0.998	0.894	0.0769025
UPI000013A9D3	1,4-dihydroxy-2-naphthoyl-CoA hydrolase	--	14.945	22.1	2	2	5	0.726	0.873	0.905	1.199	1.148	1.158	1.4	0.00804826
UPI00000D0685	Guanosine-5'-triphosphate,3'-diphosphate pyrophosphatase	--	54.871	26.3	10	10	17	0.979	0.991	0.968	1.034	0.976	1.035	1.036	0.159754
UPI000013B019	Tributyltin-inducible repressor	--	10.596	23.2	2	2	2	0.997	1.039	0.936	1.013	1.018	1.009	1.023	0.482939
UPI000013AEC5	Polyketide_cyc domain-containing protein	--	17.726	36.1	4	4	4	1.075	1.034	1.012	0.984	0.912	1.031	0.938	0.177681
UPI000013B02F	Protein ygbM	--	29.217	26.7	5	5	9	0.878	0.874	0.839	1.129	1.116	1.104	1.293	8.44093e-05
UPI0000136242	Chaperone SurA	--	47.283	61.4	25	24	67	1	1	0.992	1	1.003	1.024	1.012	0.217605
UPI0000136E10	tRNA sulfurtransferase (Fragment)	--	54.972	38	21	21	40	1.002	0.992	1.022	0.996	1.01	1.003	0.998	0.825834
UPI000013BDC1	Acetyltransferase YpeA	--	16.311	20.6	2	2	3	0.896	1.066	1.186	0.823	1.048	1.009	0.915	0.47262
UPI0000135ED9	Signal recognition particle protein	--	49.787	50.8	20	20	58	0.973	0.994	1.014	1.019	0.994	1	1.011	0.486948
UPI00000000AD	Flagellin	--	51.294	28.5	9	9	31	1.598	1.577	1.51	0.498	0.42	0.479	0.298	2.38286e-05
UPI00001254EB	Fused DNA-binding transcriptional dual regulator/O6-methylguanine-DNA methyltransferase	--	39.323	15	6	6	7	0.947	0.954	0.993	1.049	1.142	0.969	1.092	0.158773
UPI000012EEF4	2-succinylbenzoate--CoA ligase	--	50.184	15.5	5	5	6	0.978	0.953	1.018	1.05	1.046	1.009	1.053	0.0876959
UPI00001320F8	Type 4 prepilin-like proteins leader peptide-processing enzyme	--	29.466	4.1	1	1	2	0.844	0.605	1.305	1.944	0.754	0.519	1.168	0.92683
UPI000013B3E9	4HBT domain-containing protein	--	17.163	27.1	5	5	9	1.022	1.086	0.946	0.976	0.915	1.048	0.962	0.53097
UPI000013A2CD	Iron export ATP-binding protein FetA	--	25.382	52.9	9	9	19	1.036	1.056	1.01	0.962	0.948	0.974	0.93	0.00850042
UPI000013A60B	Endolytic murein transglycosylase	--	38.247	23.8	8	8	11	1.029	0.928	1.03	1.028	0.979	0.991	1.004	0.907647
UPI000012E921	Tetraacyldisaccharide 4'-kinase	--	35.589	5.8	2	2	2	1.044	0.89	1	0.993	1.046	1.035	1.048	0.388087
UPI000013A959	Inactive PncC family protein	--	18.321	35.5	6	6	9	1.086	1.045	1.016	0.935	0.944	0.972	0.906	0.0119943
UPI000012C335	3-phenylpropionate-dihydrodiol/cinnamic acid-dihydrodiol dehydrogenase	--	28.499	38.5	8	8	22	0.138	0.233	0.231	1.56	1.568	1.61	7.87	0.000271463
UPI00001113B7	Aspartate--tRNA ligase	--	65.913	60.2	36	36	120	0.98	0.975	0.99	1.036	1.006	1.004	1.034	0.0386719
UPI000012DD47	KDP operon transcriptional regulatory protein KdpE	--	25.362	40.9	9	9	12	1.002	1.023	1.02	0.912	1.023	1.005	0.966	0.373546
UPI000016552D	DNA replication and repair protein RecF	--	40.514	19.9	6	6	7	0.944	0.877	1.072	1.018	1.047	1.003	1.06	0.359399
UPI0000135206	Ribosomal RNA large subunit methyltransferase G	--	42.331	24.6	8	8	12	1.031	1.016	1.048	0.933	0.992	0.943	0.927	0.0217112
UPI000013A0B5	Putative xanthine dehydrogenase yagT iron-sulfur-binding subunit	--	24.342	27.1	4	4	6	1.329	1.228	1.176	0.705	0.741	0.796	0.601	0.000530845
UPI000012B5E2	Glycogen debranching enzyme	--	73.576	40.3	20	20	29	1.034	1.062	1.084	0.944	0.954	0.928	0.889	0.00175111
UPI000013AE3D	Cyclic diguanylate phosphodiesterase (EAL) domain protein	--	83.523	7.7	5	5	7	0.924	0.915	0.915	1.119	0.933	1.113	1.149	0.0859627
UPI00005F18BA	Cell division protein FtsN	--	31.758	54.9	14	14	27	1.014	0.96	0.92	1.035	1.021	1.012	1.06	0.110201
UPI0000168063	Aminopeptidase N	--	98.918	42.8	33	33	106	1.037	1.03	1.043	0.975	0.968	0.969	0.936	0.000103246
UPI000013A6B4	Sulfate permease family protein	--	58.384	3.1	1	1	2	0.992	1.035	1.028	0.962	0.922	1.072	0.968	0.498085
UPI000013B514	Conserved protein	--	22.612	38.3	6	6	13	1.024	1.009	1.015	1.009	0.977	0.994	0.978	0.0918625
UPI000012DE81	Thymidine kinase	--	23.456	41	7	7	12	1.017	1.018	1.018	0.982	0.95	0.988	0.956	0.0214676
UPI000013BB68	Sulfurtransferase	--	48.228	8	4	4	7	0.964	1.014	0.917	1.07	1.015	1.019	1.072	0.104887
UPI000013A6DD	Gamma-glutamyl-gamma-aminobutyrate hydrolase	--	28.013	45.3	7	7	19	1.52	1.428	1.446	0.48	0.476	0.496	0.33	1.08276e-06
UPI000013021C	Outer membrane protein assembly factor BamC	--	36.842	53.2	14	14	33	0.904	0.852	0.93	1.189	1.132	0.97	1.225	0.0396574
UPI000012904D	Uroporphyrinogen decarboxylase	--	39.248	23.2	8	8	24	0.998	1.037	0.992	1.002	0.98	0.986	0.981	0.273173
UPI000012A7DE	Protein FixA	--	27.143	9	2	2	3	1.027	1.118	1.037	0.89	0.994	0.925	0.883	0.0410424
UPI000003EB40	Anaerobic glycerol-3-phosphate dehydrogenase subunit B	--	45.357	20.8	9	9	19	0.951	0.936	0.972	1.034	1.078	1.017	1.094	0.0117381
UPI000003EB60	Peptidoglycan D,D-transpeptidase FtsI	--	63.877	20.2	9	9	10	0.987	0.953	1.142	0.96	1.001	0.977	0.953	0.472963
UPI0000032C9E	Zinc metalloprotease	--	49.071	24	10	10	12	1.02	1.088	1.028	1.013	0.962	0.923	0.924	0.0786054
UPI000003EACA	50S ribosomal protein L5	--	20.301	76	17	17	147	1.027	1.01	0.996	0.993	0.971	1.004	0.979	0.176726
UPI0000046F13	T-protein	--	42.042	33.2	11	11	12	1.039	1.012	1.052	0.969	0.982	1.013	0.955	0.0580398
UPI0000136382	Protein Syd	--	20.708	25.4	4	4	10	1.017	1.035	1.012	0.937	1.013	1.004	0.964	0.220249
UPI000013A68C	Conserved protein	--	60.813	26.1	16	16	34	1.073	1.062	1.052	0.942	0.929	0.958	0.888	0.000351237
UPI0000126B26	Vitamin B12-binding protein	--	29.366	14.3	3	3	4	1.042	1.079	1.028	0.947	1.048	0.86	0.907	0.161188
UPI000013655E	Leucine--tRNA ligase	--	97.233	53.5	46	46	124	0.997	0.991	0.985	1.002	1.01	1.014	1.018	0.0233388
UPI00000480C9	Aconitate hydratase A	--	97.676	55	43	43	171	1.017	1.005	1.032	0.998	0.968	0.97	0.961	0.0341728
UPI0000135864	Negative modulator of initiation of replication	--	20.315	50.8	7	7	20	0.98	0.984	0.97	1.094	1.07	0.929	1.054	0.383731
UPI000004CE7A	Pyruvate dehydrogenase	--	62.011	48.8	22	22	61	0.888	0.874	0.832	1.159	1.152	1.122	1.323	0.000217711
UPI000012ED1D	Hydrogenase 1 large subunit	--	66.253	52.3	27	27	71	0.876	0.849	0.872	1.182	1.128	1.112	1.318	0.000189591
UPI000013A685	N-acetyl-D-glucosamine kinase	--	33.042	14.9	2	2	3	1.148	1.156	1.137	0.835	0.903	0.868	0.757	0.000271952
UPI000013B07E	CTP:molybdopterin cytidylyltransferase	--	21.514	7.8	1	1	2	1.181	1.108	1.08	0.827	0.868	0.954	0.786	0.0082627
UPI000013A340	Conserved protein	--	12.872	19.8	3	3	8	1.15	1.161	1.116	0.815	0.825	0.953	0.757	0.00551153
UPI0000128BEC	ABC transporter, CydDC cysteine exporter (CydDC-E) family, permease/ATP-binding protein CydD	--	65.055	16.8	9	9	14	0.986	0.98	0.958	0.98	1.06	1.029	1.05	0.121897
UPI00001298E2	Periplasmic thioredoxin of cytochrome c-type biogenesis	--	20.809	22.7	4	4	7	0.998	1.022	0.91	1.096	1.023	0.97	1.054	0.350518
UPI00001B510F	Formate dehydrogenase, nitrate-inducible, major subunit	--	21.464	42.1	8	7	22	0.974	0.956	1.006	1.038	1.075	0.946	1.042	0.385824
UPI00003B25FD	L-serine dehydratase	--	48.521	28.4	10	8	23	1.016	0.939	1.019	0.99	1.028	0.984	1.009	0.758643
UPI000013766E	tRNA pseudouridine synthase A	--	30.399	34.4	7	7	10	0.954	0.995	0.993	0.994	0.962	1.031	1.015	0.570517
UPI000013B1DF	Cell division protein ZapE	--	43.063	27.5	9	9	14	1.061	1.019	1.032	0.958	1	0.986	0.946	0.0330197
UPI000013BF27	PadR domain-containing protein	--	23.401	28.5	6	6	7	0.879	0.894	0.91	1.11	1.122	1.085	1.236	0.000112669
UPI000003EB08	Gamma-glutamyl phosphate reductase	--	44.63	47	16	16	47	0.999	1	0.994	0.972	1.023	1.029	1.01	0.612461
UPI000012C336	3-phenylpropionate/cinnamic acid dioxygenase ferredoxin subunit	--	11.329	44.3	2	2	5	0.082	0.07	0.139	1.53	1.299	1.927	16.344	0.000282829
UPI00001304F3	NrfB, formate-dependent nitrite reductase	--	20.714	7.4	1	1	1	0.846	0.949	0.955	1.043	1.103	1.118	1.187	0.0182627
UPI000013AC72	Lipid A 1-diphosphate synthase	--	26.759	3	1	1	2	1.01	0.996	1.006	1.051	0.983	0.964	0.995	0.850333
UPI0000165443	Universal stress protein E	--	35.706	54.7	13	13	49	0.976	1.018	0.992	1.008	1.02	1.007	1.016	0.273551
UPI000012E232	tRNA (cytidine/uridine-2'-O-)-methyltransferase TrmJ	--	25.259	32.9	7	7	11	1.025	1.066	1.013	1.011	0.986	0.966	0.955	0.0838579
UPI000013A2DD	S4 RNA-binding domain-containing protein	--	7.3895	67.1	5	5	11	1.058	0.993	1.054	1.036	0.948	0.956	0.947	0.190803
UPI000013AE04	Glutathione S-transferase, N-terminal domain protein	--	24.516	32.1	7	7	14	1.079	1.059	1.052	0.922	0.966	0.932	0.884	0.00152115
UPI000013A594	Inner membrane protein	--	26.282	18.7	4	4	4	1.143	1.048	1.041	1.014	0.871	0.894	0.86	0.0523424
UPI000013AC2F	Diguanylate cyclase	--	123.89	13.3	11	11	15	1.092	0.994	1.09	0.96	0.936	0.914	0.885	0.0234646
UPI00001328CE	Fructose-specific PTS system EIIBC component	--	57.518	9.1	5	5	8	1.047	1.044	1.042	0.968	0.915	1.007	0.922	0.0428886
UPI000013A9AF	Undecaprenyl pyrophosphate phosphatase	--	31.495	14.4	2	2	2
UPI0000001327	Multidrug resistance protein MdtC	--	111.01	1.9	2	2	2	0.972	1.084	1.153	1.031	0.87	0.905	0.874	0.133683
UPI000002EE32	Trehalose 6-phosphate phosphatase	--	29.175	45.9	9	9	17	1.11	1.094	1.09	0.876	0.883	0.903	0.808	3.68205e-05
UPI0002B8DEAB	Outer membrane porin DLP12 prophage	--	39.266	45.4	15	13	142	0.912	0.868	0.927	1.248	1.054	0.947	1.2	0.0999921
UPI00005F0574	Putative cytoplasmic protein	--	10.835	65.7	4	4	7	1.193	1.236	1.264	0.708	0.744	0.847	0.623	0.00104769
UPI0001B534AC	Guanine deaminase	--	50.112	28.3	10	10	13	1.047	1.017	0.995	0.961	0.949	0.963	0.939	0.0154985
UPI000013AE0C	tRNA 5-methylaminomethyl-2-thiouridine biosynthesis bifunctional protein MnmC	--	74.433	18	9	9	9	1.066	0.964	1.024	0.955	1.016	1.005	0.974	0.507411
UPI00001B5117	GAF domain protein	--	18.121	35.2	8	8	15	1.105	1.088	1.028	0.912	0.988	0.93	0.879	0.0164894
UPI00003B2611	NADH pyrophosphatase	--	29.689	42.4	10	10	19	0.979	1.011	1.016	1.003	0.99	1.021	1.003	0.862267
UPI0000137B19	Transcriptional regulatory protein UhpA	--	20.889	8.7	2	2	2
UPI00001127A6	Succinate dehydrogenase iron-sulfur subunit	--	26.77	57.1	13	13	81	0.977	0.997	0.986	1.011	1.031	1.015	1.033	0.0182852
UPI00001680B4	Peptidyl-dipeptidase dcp (Dipeptidyl carboxypeptidase)	--	77.515	30.2	19	19	39	1.003	0.998	0.932	1.054	1.006	1.046	1.059	0.106164
UPI000013B21C	Putative cytoplasmic protein	--	7.5987	34.8	2	2	6	0.974	0.975	1.019	1.021	1.004	1.087	1.049	0.17303
UPI000013B39A	Glycosyl hydrolase, family 31	--	88.078	4.8	4	4	4	1.02	0.987	0.844	0.986	1.152	1.022	1.108	0.237833
UPI00001639D8	GTP cyclohydrolase 1	--	24.83	50.5	9	9	23	0.957	0.941	0.97	1.092	1.004	1.068	1.103	0.0214194
UPI000013B55E	Epoxyqueuosine reductase	--	43.072	7.4	2	2	2	1.017	1.031	0.975	0.995	0.941	1.055	0.989	0.772678
UPI000013BFB1	Arabinose 5-phosphate isomerase	--	35.196	32	10	10	27	0.982	0.952	0.919	1.041	1.04	1.068	1.104	0.00926567
UPI0000148D99	Peptide methionine sulfoxide reductase MsrA	--	23.315	50.9	8	8	19	1.034	1.066	1.044	0.956	0.926	1.004	0.918	0.0268005
UPI000013AEB9	Acetyltransferase (GNAT) family protein	--	97.986	20	15	15	23	1.047	1.023	1.071	0.933	0.96	0.998	0.92	0.0243248
UPI000013225C	Ribosomal protein L11 methyltransferase	--	31.877	19.5	5	5	11	0.962	1.053	1.008	0.971	0.985	0.973	0.969	0.307625
UPI000013A6CB	Lipopolysaccharide assembly protein A	--	11.351	21.6	2	2	6	1.131	0.875	1.005	1.066	1.033	1.009	1.032	0.651845
UPI000013B388	Rhodanese-like protein	--	15.596	43.4	6	6	18	0.978	0.976	1.006	1.045	0.993	0.976	1.018	0.478167
UPI00001377B0	Tartrate dehydrogenase/decarboxylase	--	40.314	34.1	10	10	15	1.071	1.149	1.161	0.899	0.893	0.864	0.786	0.00102551
UPI00005F17B1	Ubiquinone biosynthesis accessory factor UbiK	--	11.276	66.7	7	7	21	1.011	1.069	0.998	0.952	0.986	0.971	0.945	0.0745049
UPI000013B26B	Protein	--	61.164	1.7	1	1	1
UPI000012C5D4	Ferrochelatase	--	35.884	19.7	5	5	9	1.11	0.926	0.915	0.961	1.084	1.012	1.036	0.623131
UPI000013B29D	Phosphoethanolamine transferase eptB	--	63.804	14.4	7	7	8	0.949	1.01	0.908	0.969	0.984	1.087	1.06	0.286942
UPI00001126EC	Mutator protein (7,8-dihydro-8-oxoguanine-triphosphatase)	--	14.927	29.5	4	4	7	1.098	1.035	1.098	0.935	0.96	0.912	0.869	0.00467607
UPI000013B3C8	HAD hydrolase, IA, variant 1 family protein	--	24.664	11.3	3	3	3
UPI00001653D8	UvrABC system protein B	--	76.225	35.7	23	23	38	0.989	0.985	0.972	0.997	1.022	0.994	1.023	0.0935851
UPI00001639DE	Amidophosphoribosyltransferase	--	56.487	33.7	14	14	24	1.028	0.98	1.018	1.015	0.965	0.973	0.976	0.316702
UPI000012D02F	Hydrogenase isoenzymes nickel incorporation protein HypB	--	31.565	47.6	8	8	22	0.946	0.946	1.001	1.01	1.024	1.047	1.065	0.0427239
UPI000013A063	RF-1 domain protein	--	15.623	6.4	1	1	1
UPI0000131756	Formate C-acetyltransferase/glycerol dehydratase family glycyl radical enzyme	--	90.124	5.2	4	4	4	1.034	1.067	1.066	0.842	1.007	1.004	0.901	0.14726
UPI0000128D1C	Cysteine synthase	--	32.664	4.6	1	1	1	0.852	1.055	1.243	0.997	0.836	1.036	0.911	0.538194
UPI000003EAC7	50S ribosomal protein L6	--	18.904	60.5	10	10	73	1.022	1.016	0.996	0.977	1.008	0.995	0.982	0.206951
UPI000005A94A	30S ribosomal protein S18	--	8.9863	48	4	4	22	1.015	0.925	1.007	1.055	0.979	0.982	1.023	0.575593
UPI00003B2604	Aminotransferase, class I/II	--	46.711	24.9	9	9	16	0.879	0.93	0.98	1.088	1.038	1.094	1.155	0.0153334
UPI000002E08C	1-acyl-sn-glycerol-3-phosphate acyltransferase	--	27.453	17.1	4	4	5	1.03	1.077	0.756	1.05	1.046	1.05	1.099	0.394056
UPI00000480E3	Oxygen-insensitive NADPH nitroreductase	--	26.8	45	10	10	26	0.983	0.945	0.927	1.018	1.039	1.078	1.098	0.0176995
UPI0000131931	Chorismate mutase-P and prephenate dehydratase	--	43.111	36.8	14	14	26	1.03	1.038	1.014	0.99	0.952	0.998	0.954	0.0425219
UPI000003EB63	Phospho-N-acetylmuramoyl-pentapeptide-transferase	--	39.874	7.8	3	3	8	1.039	0.876	0.962	1.116	1.07	0.996	1.106	0.161196
UPI0000135551	Peptide ABC transporter ATP-binding protein SapD	--	37.66	38.2	10	10	13	0.891	0.911	0.984	1.064	1.085	0.986	1.125	0.0479579
UPI000013A0D8	S-formylglutathione hydrolase	--	31.424	8.7	2	2	6	0.961	0.931	1.007	0.952	1.064	1.065	1.063	0.241021
UPI000013B5D7	Glycine radical enzyme activase	--	31.49	4.5	1	1	1	1.053	0.836	0.995	1.045	0.993	1.084	1.083	0.322528
UPI000013A365	Glycosyl transferase family, helical bundle domain protein	--	35.048	58.4	14	14	49	0.929	0.962	0.958	1.055	1.072	1.035	1.11	0.00223714
UPI000013A6C2	Pseudouridine synthase	--	32.711	41.2	11	11	18	1.007	1.04	1.101	0.975	0.947	0.989	0.925	0.0554248
UPI000012B84F	3-hydroxyisobutyrate dehydrogenase and related beta-hydroxyacid dehydrogenases	--	30.8	35.6	10	10	40	0.986	1.002	0.958	1.02	1.014	1.027	1.039	0.0478846
UPI000013B29B	PF10945 family protein	--	7.0178	56.5	3	3	3	1.071	1.124	1.167	0.877	1.014	0.896	0.829	0.0215315
UPI00001639A8	Spermidine/putrescine ABC transporter, permease protein PotB	--	32.208	9.1	3	3	3
UPI000012A948	Flagellar biosynthesis anti-sigma factor FlgM	--	10.34	30.9	2	2	2	1.212	1.035	1.12	0.902	0.842	0.902	0.786	0.00936141
UPI000013B098	Putative cytoplasmic protein	--	12.88	33.3	3	3	15	0.993	1.012	0.96	1	0.993	1.05	1.026	0.329954
UPI000013B535	Inner membrane protein yjcH	--	11.671	26.9	3	3	5	1.501	1.485	1.364	0.598	0.63	0.623	0.426	1.52331e-05
UPI0000137F15	Altronate oxidoreductase	--	54.808	22.4	10	10	16	0.985	0.884	0.972	1.042	0.97	1.095	1.094	0.141902
UPI000012675F	DNA-binding response regulator in two-component regulatory system with BaeS	--	27.656	48.3	10	10	14	0.98	0.958	0.957	0.986	1.024	1.11	1.078	0.10856
UPI0000006216	DNA-binding protein Fis	--	11.24	32.7	3	3	9	1.086	1.186	1.121	0.871	0.872	0.948	0.793	0.00367513
UPI000013B229	PfkB family carbohydrate kinase family protein	--	28.332	6.9	1	1	1	1.223	0.939	1.061	0.895	0.834	1.057	0.864	0.235122
UPI0000163A07	Hydrogenase 2, large subunit	--	62.49	59.3	25	25	71	0.996	0.972	0.966	1.056	1.01	1.007	1.047	0.0622305
UPI0000129736	2,3-diaminopropionate ammonia-lyase	--	43.327	31.2	9	9	16	1.095	1.072	1.006	0.907	0.924	0.957	0.879	0.0125678
UPI0000128BE9	Cytochrome D ubiquinol oxidase subunit I	--	58.204	24.7	14	14	63	0.917	0.864	0.894	1.176	1.11	1.062	1.252	0.00281408
UPI0000673DD8	Nickel import ATP-binding protein NikE	--	69.113	15.9	10	10	11	1.08	1.138	0.96	0.948	0.986	0.948	0.907	0.140229
UPI00003B2612	Sugar ABC transporter ATP-binding protein	--	55.259	14.4	7	7	9	1.045	0.906	0.954	1.004	1.015	0.966	1.028	0.552847
UPI00001680C9	Phosphoenolpyruvate synthase	--	87.434	46.5	33	33	184	1.04	1.032	1.046	0.96	0.975	0.96	0.928	0.000330966
UPI000012B73E	Glutamine ABC transporter, periplasmic glutamine-binding protein GlnH	--	27.19	58.5	15	15	60	1.03	1.075	1.025	0.916	0.938	1.016	0.917	0.0657941
UPI000012A2E6	Exodeoxyribonuclease 7 large subunit	--	51.832	15.6	7	7	8	0.92	0.826	1.038	1.074	1.258	0.839	1.139	0.421461
UPI00001114B1	Thiamine biosynthesis protein ThiS	--	7.3112	22.7	1	1	2	1.046	1.058	1.056	0.946	0.976	0.934	0.904	0.00170292
UPI0000168075	Dihydroorotase	--	38.827	35.6	11	11	20	1.02	1.039	1.006	0.968	0.969	1.01	0.962	0.0793939
UPI0000128415	Protein CreA	--	17.108	49.7	6	6	11	0.99	0.964	0.955	1.053	1.072	1.046	1.09	0.00269997
UPI00001293EB	ATP-dependent DNA helicase DinG	--	81.439	8.9	5	5	6	1.03	1.095	1.022	0.909	0.922	1.039	0.912	0.121434
UPI000013A08D	Putative NAD(P)-binding C-N hydrolase family amidase	--	28.925	35.2	8	8	15	1.061	0.977	1.096	1	0.928	0.938	0.914	0.0986355
UPI00005EEC5A	NADH-quinone oxidoreductase subunit N	--	52.043	2.3	1	1	2	1.014	1.017	0.975	1.006	1.021	0.98	1	0.984553
UPI000003EB61	UDP-N-acetylmuramoyl-L-alanyl-D-glutamate--2,6-diaminopimelate ligase	--	53.343	46.5	17	17	47	0.965	0.998	0.95	0.989	1.031	1.032	1.048	0.0822185
UPI00001653CF	2,3-bisphosphoglycerate-dependent phosphoglycerate mutase	--	28.556	41.6	12	12	46	0.98	1.001	0.99	0.993	1.022	0.994	1.013	0.323294
UPI000013A0F8	Putative NAD(P)H-dependent xylose reductase	--	36.42	28.7	8	8	24	1.03	0.992	1.047	0.994	0.976	0.988	0.964	0.0955524
UPI000013C08C	Electron transport protein hydN	--	17.459	7	1	1	2	1.103	0.975	1.03	1.067	0.988	0.845	0.933	0.40085
UPI0000111A4D	Probable cytosol aminopeptidase	--	54.879	55.7	23	23	71	1.015	0.982	1.005	0.999	1.011	0.993	1	0.972984
UPI0000168061	3-deoxy-manno-octulosonate cytidylyltransferase	--	27.614	52.4	11	11	29	1.009	1.005	1.007	0.984	0.996	1.014	0.991	0.36167
UPI0000168251	Lipoate-protein ligase A	--	37.925	20.1	7	7	13	0.993	0.965	1.014	1.009	1.065	1.016	1.04	0.155393
UPI0000047C95	YqjK-like family protein	--	11.811	25.3	3	3	5	0.856	0.889	1.024	1.08	1.124	1.038	1.171	0.0537036
UPI00001366F5	Valine--tRNA ligase	--	108.19	43.5	41	41	125	1.01	0.978	1.035	1.008	0.984	1.039	1.003	0.912356
UPI0000167FF6	Isoleucine--tRNA ligase	--	104.3	54.5	42	42	144	1.018	0.983	0.991	1.017	1.003	1.009	1.012	0.334946
UPI00001260B0	Arsenical resistance operon repressor	--	13.252	9.4	1	1	1
UPI00001258D2	Alanine racemase	--	38.844	26.1	8	8	22	1.042	1.082	1.097	0.949	0.879	0.919	0.853	0.00412473
UPI000012832E	Hsp90-like protein	--	51.624	20.8	8	8	15	1.015	1.003	1.117	0.976	0.945	0.97	0.922	0.0873268
UPI000005D7DF	GatR1	--	15.849	25	3	3	6	0.963	0.993	0.845	0.96	1.179	1.074	1.147	0.153091
UPI000013A679	Hydrolase, TatD family	--	29.808	47.2	11	11	21	0.979	1.041	0.937	1.004	0.98	1.082	1.037	0.443481
UPI000012F0A1	4-hydroxy-2-oxovalerate aldolase	--	36.47	40.9	11	11	33	0.224	0.31	0.29	1.63	1.429	1.579	5.629	8.36043e-05
UPI000013ABCD	Mce related protein	--	94.969	30.7	22	22	31	1.084	1.022	1.05	1.03	0.908	0.917	0.905	0.0816944
UPI0000125895	Ureidoglycolate lyase	--	18.169	53.1	6	6	13	1.21	1.163	1.181	0.77	0.79	0.81	0.667	2.63704e-05
UPI000012CFD9	Hydrogenase maturation factor HybF	--	12.697	30.1	3	3	4	0.782	0.762	0.594	1.308	1.693	0.863	1.807	0.0591324
UPI000013B297	Protein yhjJ	--	55.527	55.4	21	21	38	0.99	0.956	0.971	1.008	1.037	1.047	1.06	0.0187309
UPI000013387A	ATP-dependent RNA helicase RhlE	--	49.989	32.2	11	11	14	0.955	1.076	1.096	0.956	0.954	0.962	0.918	0.126522
UPI000013B286	Multidrug resistance efflux transporter	--	41.19	63.6	19	19	56	0.82	0.796	0.824	1.175	1.189	1.119	1.427	7.79673e-05
UPI000012FD0C	Beta-hexosaminidase	--	37.594	42.8	12	12	34	1.006	1.01	0.997	0.981	0.965	0.971	0.968	0.00618361
UPI000013AE16	Fimbrial subunit	--	17.89	8	1	1	1	0.841	0.837	0.884	1.324	1.12	0.993	1.342	0.028071
UPI0000136477	Glycine--tRNA ligase alpha subunit	--	34.774	39.3	11	11	34	0.928	1.001	0.939	1.035	1.037	1.06	1.092	0.0231741
UPI00000480CE	Acetyltransferase	--	19.247	9.3	1	1	5	0.843	0.695	0.967	0.976	1.033	1.241	1.297	0.0928213
UPI000013B7F7	(S)-ureidoglycine aminohydrolase	--	28.73	19.9	4	4	10	1.187	1.219	1.247	0.784	0.807	0.814	0.658	2.14052e-05
UPI0000133484	Outer membrane lipoprotein RcsF	--	14.163	75.4	8	8	22	0.824	0.834	0.917	1.25	1.14	0.996	1.315	0.0217495
UPI00000D0333	OmpA family protein	--	22.197	29.7	4	4	12	0.917	1.045	1.055	1.054	0.944	1.065	1.015	0.805051
UPI000012974E	Transcriptional regulatory protein	--	25.453	24.3	3	3	3	1.002	1.002	1.046	0.896	0.976	1.096	0.973	0.638919
UPI00001250CC	Bifunctional protein Aas	--	80.699	15.6	11	11	15	1.038	1.036	1.09	0.96	0.924	0.91	0.883	0.00567781
UPI000012A2CB	RecBCD enzyme subunit RecD	--	66.902	21.2	11	11	13	1.025	0.969	0.991	1.006	0.991	1.052	1.021	0.432313
UPI0000047CBF	Glutathione reductase	--	48.772	54.7	18	18	60	0.961	1.005	0.964	1.011	1.038	1.02	1.047	0.0469063
UPI00001256AF	DNA-binding transcriptional dual regulator	--	29.572	29	7	7	15	1.011	0.995	0.997	0.959	1.022	1.038	1.005	0.856845
UPI0000135A28	Outer membrane lipoprotein, Slp family	--	20.964	50.5	7	7	43	0.854	0.8	0.883	1.306	1.184	0.946	1.354	0.0415574
UPI000003EAEC	PTS N-acetyl glucosamine transporter subunit IIABC	--	68.346	19.1	10	10	25	1.031	1.047	0.997	0.957	1.021	0.955	0.954	0.144439
UPI0000110702	Bifunctional protein FolD	--	31.043	27.8	8	8	17	0.99	1.03	1.032	0.99	0.974	1.026	0.98	0.371731
UPI000013ABB4	Carnitine monooxygenase oxygenase subunit	--	42.56	37.2	10	10	14	1.366	1.566	1.492	0.426	0.602	0.591	0.366	0.00104164
UPI0000047CB1	Type 1 fimbrial adhesin FimH	--	31.473	10.7	2	2	3	0.893	1.017	0.898	0.992	1.062	1.079	1.116	0.0897322
UPI000004DBA1	Arabinose-proton symporter	--	51.684	4	2	2	3	1	0.983	1	1.001	0.924	1.102	1.015	0.825275
UPI000013AEB5	Outer membrane protein assembly factor BamD	--	27.829	60.4	13	13	36	0.968	0.933	0.988	1.181	1.007	0.965	1.091	0.258352
UPI000012B560	Glycolate oxidase subunit, FAD-linked	--	53.811	42.5	19	19	32	1.067	1.019	1.087	0.976	0.904	0.908	0.879	0.0145177
UPI000013B527	tRNA-dihydrouridine(20/20a) synthase	--	36.81	57.9	14	14	25	1.009	1.066	1.008	0.98	0.971	1.042	0.971	0.360291
UPI00001379C7	Flavin prenyltransferase UbiX	--	20.695	24.3	3	3	3	0.984	0.98	1.08	0.96	0.974	1.036	0.976	0.573185
UPI000013B054	Putative lipoprotein	--	8.1741	26.7	1	1	13	0.878	0.94	0.955	1.184	1.052	0.973	1.157	0.0838013
UPI000003EB3A	Nuclease SbcCD subunit C	--	118.72	22.7	15	15	20	0.971	1.001	1.038	1.018	1.01	1.018	1.012	0.563146
UPI00000016B5	Protein MtfA	--	30.279	12.1	3	3	5	0.82	1.152	1.027	0.78	1.015	1.056	0.951	0.737251
UPI0000059F9B	Acyl carrier protein	--	8.6394	41	3	3	49	1.037	0.974	0.962	1.009	1.042	0.996	1.025	0.405116
UPI000003EB54	Endonuclease-1 (Endonuclease I) (Endo I)	--	26.709	32.8	6	6	8	1.007	0.85	0.996	0.952	1.028	1.037	1.057	0.395692
UPI000003EB29	tRNA (guanosine(18)-2'-O)-methyltransferase	--	25.343	16.6	3	3	8	0.992	1.02	1.035	1.027	0.989	0.995	0.988	0.525315
UPI000003EADF	50S ribosomal protein L29	--	7.2734	49.2	3	3	31	0.997	1.021	1.038	0.981	0.972	0.996	0.965	0.0602127
UPI00001113F6	Aminodeoxychorismate lyase	--	29.715	16.4	4	4	6	0.99	1.12	1.021	0.95	1.005	0.964	0.932	0.165414
UPI000013B29C	Inner membrane transporter YhjV	--	47.257	3.8	1	1	1
UPI000013A395	Epimerase, NAD dependent epimerase/dehydratase family	--	38.085	28.5	7	7	11	0.893	0.942	1.007	1.035	1.048	1.082	1.114	0.0431251
UPI00001328E1	Glucitol/sorbitol-specific phosphotransferase enzyme IIA component	--	13.304	61	4	4	7	0.848	0.98	0.929	1.058	1	1.107	1.148	0.0541259
UPI000012974F	Sensor histidine kinase DpiB	--	61.683	2.7	2	2	2	1.008	0.919	0.849	1.122	1.031	1.075	1.163	0.0507325
UPI00001361C6	Iron-sulfur cluster assembly accessory protein	--	13.3	31.1	2	2	5	1.084	1.009	1.006	0.982	0.967	1.013	0.956	0.18455
UPI000013B28F	Putative cytochrome C peroxidase	--	51.57	34	16	16	32	0.878	0.891	0.915	1.1	1.119	1.118	1.243	8.12715e-05
UPI0000133F0B	50S ribosomal protein L31	--	7.871	72.9	5	5	31	1.044	1.044	1.023	0.886	0.982	1.006	0.924	0.110774
UPI0000134637	Ribose-5-phosphate isomerase A	--	22.86	33.8	8	8	41	0.974	0.994	0.959	0.998	1.03	1.018	1.041	0.0453089
UPI000011127F	DNA replication terminus site-binding protein	--	35.783	20.7	5	5	8	1.065	0.94	0.865	1.07	1.056	1.047	1.106	0.162204
UPI00000D0AE2	Gluconate transporter	--	45.966	11.6	5	5	10	0.894	0.912	1.029	1.032	1.071	1.075	1.121	0.0645823
UPI0000130D68	Oligopeptidase A	--	77.166	47.8	32	32	113	1.014	1.006	1.026	0.988	0.988	0.996	0.976	0.0177204
UPI000003121D	Cysteine desulfurase IscS	--	45.089	51.2	16	16	55	0.892	0.892	0.887	1.129	1.086	1.125	1.25	5.82844e-05
UPI000013B82D	Biofilm formation regulatory protein BssR	--	14.536	9.4	1	1	2
UPI00001654D1	Hydrogenase 3 maturation protease	--	17.056	16.7	2	2	2	1.023	1.128	1.056	0.96	0.863	0.986	0.876	0.055539
UPI0000163968	Elongation factor Ts	--	30.423	74.6	24	24	143	1.01	1.05	1.028	0.969	0.975	0.98	0.947	0.00960736
UPI0000128F68	Diaminopimelate decarboxylase	--	46.177	23.1	7	7	8	1.017	0.991	0.892	1.113	1.012	1.085	1.107	0.105785
UPI000013186D	Phosphatidylglycerophosphatase B	--	29.021	7.9	2	2	2
UPI000003EB37	N-succinylglutamate 5-semialdehyde dehydrogenase	--	53.026	13.4	7	7	16	1.403	1.394	1.429	0.552	0.624	0.586	0.417	1.72372e-05
UPI000013A958	BOF domain-containing protein	--	14.121	47.7	5	5	13	1.227	1.257	1.238	0.722	0.841	0.783	0.63	0.000485722
UPI00021BA2F6	PTS trehalose transporter subunit IIBC	--	50.949	2.5	1	1	1
UPI0000129445	2,5-diketo-D-gluconate reductase A	--	31.109	65.8	21	21	64	1.101	1.094	1.072	0.895	0.952	0.919	0.847	0.00104983
UPI000013A2EB	PF04237 family protein	--	14.05	23.8	3	3	3	0.92	1.036	1.024	1	1.016	1.021	1.019	0.623924
UPI000013AC55	ATP-binding protein	--	34.424	15.3	5	5	6	1.112	1.106	1.034	0.876	0.972	0.871	0.836	0.0135307
UPI000013788D	GTP-binding protein	--	67.355	41.8	23	23	70	1.015	1.011	1.05	0.988	0.972	0.964	0.951	0.0225861
UPI000012B7AF	Glycerophosphoryl diester phosphodiesterase GlpQ	--	40.843	57.8	21	21	137	0.882	0.873	0.858	1.105	1.134	1.166	1.303	0.00011106
UPI000013A07B	Esterase FrsA	--	47.008	45.9	18	18	31	0.94	0.997	0.955	0.99	1.066	1.03	1.067	0.0793247
UPI0000163A5C	Diacylglycerol kinase	--	13.245	16.4	2	2	3	1.018	1.064	0.927	1.064	0.997	0.94	0.997	0.96807
UPI000013B079	Cell division protein ZapA	--	12.594	52.3	5	5	18	1.011	1.024	0.995	1.008	0.983	1.011	0.991	0.488038
UPI000013A985	Protein ydgA	--	54.688	58.2	24	24	92	1.066	1.057	1.095	0.926	0.949	0.897	0.861	0.00155584
UPI0000167FF8	Pseudouridine synthase	--	24.86	26	4	4	7	1.058	1.064	0.939	0.932	1	1.022	0.965	0.520514
UPI000012B629	Glucokinase	--	34.723	34.9	9	9	27	0.93	0.97	0.962	1.05	1.074	1.018	1.098	0.00985186
UPI000013A5A1	DUF218 domain-containing protein	--	28.666	8.5	2	2	5	1.008	1.017	1.033	0.967	0.966	1.024	0.967	0.174339
UPI00001119A3	GMP synthase [glutamine-hydrolyzing]	--	58.679	53.7	30	30	103	1.038	1.01	1.043	0.982	0.975	0.985	0.952	0.00920648
UPI00003B260E	HAD-superfamily hydrolase, subfamily IIB	--	29.707	48.1	9	9	22	0.896	1.018	0.983	1.028	1.051	1.03	1.073	0.136546
UPI000016812D	Cell division protein ZipA	--	36.475	27.1	6	6	12	0.976	1.067	1.002	0.976	0.952	1.01	0.965	0.324633
UPI000013AC70	NAD-dependent dihydropyrimidine dehydrogenase sunbunit PreT	--	44.329	46.6	15	15	23	0.916	0.899	0.883	1.085	1.078	1.126	1.219	0.000326334
UPI0000111BDE	3-oxoacyl-[acyl-carrier-protein] synthase 3	--	33.515	43.2	10	10	32	1.029	1.036	1.034	0.968	0.994	0.92	0.93	0.0326515
UPI000013A6AE	Predicted inner membrane protein	--	10.486	16.3	2	2	2
UPI000016F62C	Alpha-1,4 glucan phosphorylase	--	90.521	40.3	30	30	96	1.042	1.029	1.039	0.978	0.951	0.965	0.931	0.00128359
UPI000013B367	Predicted transcriptional regulator	--	11.033	32.3	3	3	7	1.393	1.329	1.272	0.691	0.653	0.728	0.519	8.81787e-05
UPI000013BDE1	Membrane protein	--	15.211	5.7	1	1	1	1.159	1.188	1.214	0.916	0.777	0.765	0.69	0.00320746
UPI000013554B	Peptide ABC transporter permease	--	36.038	2.5	1	1	1
UPI0000112C08	Ribonuclease H	--	17.597	41.3	4	4	5	1.086	1.088	0.948	1.11	0.927	0.86	0.928	0.424319
UPI00001351EA	Regulator of sigma D	--	18.243	7	1	1	4	1.091	1.012	1.066	1.01	0.848	0.928	0.879	0.0765901
UPI000013452B	Peptidoglycan glycosyltransferase MrdB	--	40.476	4.3	2	2	2	1.123	0.948	1.002	0.986	0.986	0.964	0.955	0.440406
UPI000013119F	2,3-dehydroadipyl-CoA hydratase	--	27.237	23.5	5	5	6	1.402	1.43	1.362	0.726	0.576	0.53	0.437	0.000922497
UPI000003EB5D	Transcriptional regulator MraZ	--	17.386	43.4	6	6	10	0.946	0.924	0.973	1.024	1.04	1.06	1.099	0.00628905
UPI00001319CA	Histidine kinase	--	55.299	9.7	4	4	5	1.061	0.983	0.97	1.051	0.975	0.984	0.999	0.977381
UPI0000F0BDDB	C-lysozyme inhibitor	--	15.995	73	7	7	64	0.972	0.99	0.96	0.974	1.019	1.065	1.047	0.175191
UPI000003EB04	Single-stranded-DNA-specific exonuclease RecJ	--	63.388	6.8	3	3	4	0.956	1.026	1.298	0.86	0.88	1.005	0.837	0.175415
UPI000000E972	Hydrolase, alpha/beta domain protein	--	38.978	13.8	5	5	7	0.966	0.942	1.088	1.01	1.011	1.068	1.031	0.539665
UPI000016F08D	Putative lipoprotein	--	13.204	25.6	2	2	3	1.052	0.936	1.029	1.086	0.994	0.913	0.992	0.88818
UPI000012A2A1	BMC domain-containing protein	--	11.649	28.8	3	3	4	0.952	0.927	0.963	1.022	0.985	1.155	1.113	0.102028
UPI000013A042	Putative phosphotransferase enzyme IIA component yadI	--	16.54	6.2	1	1	1	0.83	0.947	0.94	1.078	0.991	1.224	1.212	0.0637406
UPI0000167DCC	Peptidoglycan-binding protein LysM	--	16.063	71.1	11	11	51	0.982	0.905	0.961	1.131	1.063	0.972	1.112	0.106283
UPI0000128FA5	Glutamate decarboxylase	--	52.685	63.5	26	1	439	0.991	0.915	0.95	1.002	1.085	1.125	1.125	0.0471856
UPI000013A0C6	Predicted oxidoreductase, Zn-dependent and NAD(P)-binding protein	--	37.978	53.3	15	15	43	1.024	1.122	1.062	0.93	0.971	0.922	0.88	0.0147664
UPI000012C942	Outer membrane protein	--	17.688	32.3	5	5	33	0.938	0.943	0.96	1.04	1.047	1.064	1.109	0.000444056
UPI000018F705	UPF0234 protein YajQ	--	18.344	55.8	10	10	33	0.949	0.95	0.918	1.034	1.07	1.083	1.131	0.00230391
UPI000002D3AC	D-3-phosphoglycerate dehydrogenase	--	44.175	32	10	10	14	0.919	0.863	0.903	1.122	1.058	1.096	1.22	0.00142049
UPI0000034199	Phosphopantetheine adenylyltransferase	--	17.836	68.6	7	7	21	0.995	1.021	0.994	0.958	0.976	0.998	0.974	0.148355
UPI000012F09D	3-(3-hydroxy-phenyl)propionate/3-hydroxycinnamic acid hydroxylase	--	62.185	37	18	18	52	0.319	0.258	0.385	1.56	1.466	1.662	4.873	0.00019201
UPI000013A0D6	UPF0178 protein YaiI	--	16.969	34.2	5	5	6	0.94	1.075	0.996	0.977	1.04	1.024	1.01	0.810124
UPI0000032AA8	Outer membrane protein C	--	40.368	48	16	13	111	0.929	0.904	0.984	1.177	1	0.968	1.116	0.1772
UPI000012FFCE	Endonuclease V	--	24.672	40.8	8	8	15	0.978	1.082	1.138	0.941	0.895	0.978	0.88	0.069501
UPI00001B513F	Putative GTP-binding protein	--	52.636	2.1	1	1	1	0.962	0.921	1.024	0.98	1.015	1.11	1.068	0.245878
UPI000012FD62	Periplasmic nitrate reductase, electron transfer subunit	--	16.296	38.9	4	4	8	0.969	0.977	0.94	0.937	1.116	1.087	1.088	0.216695
UPI0000138FD9	Xanthine dehydrogenase, FAD-binding subunit	--	31.556	39.7	10	10	14	0.92	0.939	1.022	1.045	1.059	1.048	1.094	0.048661
UPI000013BFD6	GMP/IMP nucleotidase	--	25.399	12.6	3	3	5	1.176	1.156	1.3	0.772	0.722	0.896	0.658	0.00460443
UPI000013A2F7	Zinc-binding dehydrogenase family protein	--	44.175	21.8	6	6	7	1.205	1.287	1.242	0.808	0.746	0.755	0.618	0.000104696
UPI00000480C5	Glucose-6-phosphate isomerase	--	61.529	55	26	26	119	0.972	0.962	0.968	1.019	1.018	1.044	1.062	0.00242764
UPI000012B0B0	HTH-type transcriptional regulator galS	--	37.356	23.7	7	7	7	1.046	1.028	1.009	1.014	0.953	0.963	0.95	0.0789393
UPI00001680B1	Trans-aconitate 2-methyltransferase	--	29.006	29	5	5	13	1.112	1.078	1.036	0.985	0.94	0.967	0.896	0.0113765
UPI000000023B	Cold shock-like protein cspE CSP-E	--	7.4634	78.3	5	5	37	1.016	0.985	0.995	1.06	0.935	1.012	1.004	0.952085
UPI0000126002	Phospho-2-dehydro-3-deoxyheptonate aldolase	--	38.804	31.7	7	6	11	1.065	1.109	1.086	1.006	0.851	0.939	0.858	0.0355714
UPI00000480DD	Formate C-acetyltransferase	--	85.356	60.9	39	35	276	0.902	0.897	0.898	1.1	1.09	1.105	1.222	1.34792e-06
UPI000011F6D8	DNA-directed RNA polymerase subunit beta	--	150.63	56.9	66	66	308	1.018	1	1.01	1.005	0.994	0.986	0.986	0.13159
UPI000013AC77	ABC transporter permease subunit	--	38.091	6.2	2	2	2	1.105	1.076	1.087	0.916	0.976	0.859	0.842	0.00998274
UPI000013906B	DNA-binding transcriptional activator, xylose-binding	--	44.869	21.9	7	7	9	1.04	1.108	1.069	1.01	0.919	0.955	0.896	0.0292185
UPI000013AC7C	UPF0352 protein YejL	--	8.2884	28	3	3	6	1.105	1.124	1.001	0.925	0.83	1.035	0.864	0.111329
UPI0000001326	Multidrug resistance protein MdtB	--	112.08	3.6	3	3	4	1.494	1.549	1.538	0.478	0.432	0.521	0.312	2.97683e-05
UPI00000016C3	SPFH domain/SPFH family protein	--	33.743	42.6	9	9	24	1.047	1.008	1.028	0.987	0.945	0.924	0.926	0.0260713
UPI000003EAE7	50S ribosomal protein L3	--	22.243	67.5	15	15	121	1.011	0.96	1.012	1.001	1.024	0.972	1.005	0.846553
UPI0000126030	Conserved protein	--	24.917	20.9	4	4	5	1.037	1.093	1.055	0.909	0.923	0.969	0.879	0.00650419
UPI0000031A3D	Protein translocase subunit SecD	--	66.631	35.8	20	20	49	1.017	0.99	1.061	1.022	0.974	0.948	0.96	0.23803
UPI000012ACAC	Cell division protein FtsA	--	45.329	33.3	10	10	24	1.002	0.97	0.958	1.034	1.018	1.026	1.051	0.0248799
UPI000012A611	Transcriptional regulator FeaR	--	34.62	7.6	2	2	2	1.042	1.07	1.057	0.932	0.955	0.96	0.898	0.000845155
UPI000000093E	Hemolysin expression-modulating protein	--	8.6279	62.5	6	6	11	1.158	1.123	1.172	0.846	0.835	0.863	0.737	4.35541e-05
UPI0000126A64	Lipoprotein bor	--	10.447	10.3	1	1	2	0.93	0.94	0.946	1.173	1.01	1.005	1.132	0.0756711
UPI000012C8B9	Histidine transport ATP-binding protein HisP	--	28.653	21.8	5	5	8	1.14	1.072	1.146	0.829	0.738	0.958	0.752	0.0208113
UPI0000128D72	Transcriptional regulator	--	37.819	22.3	7	7	12	0.871	0.903	1.052	1.112	1.183	0.913	1.135	0.270446
UPI000012DD24	Kinase, PfkB family	--	33.962	25.9	5	5	11	0.944	0.978	0.98	1.046	1.022	1.056	1.076	0.00902905
UPI000013A971	KR domain protein	--	27.249	48	10	10	31	1.02	0.986	1.05	0.956	1.032	0.994	0.976	0.437006
UPI0000135C6E	Predicted regulator	--	12.359	18	2	2	2	1.374	1.045	0.807	0.83	0.856	1.096	0.862	0.495872
UPI000013A6CD	DeoR family transcriptional regulator	--	27.602	35.7	7	7	12	0.891	0.961	1	1.05	1.069	1.042	1.108	0.0400671
UPI0000129E4A	Glyoxalase	--	22.981	53	8	8	23	0.957	0.965	0.959	1.024	1.057	1.012	1.074	0.00586678
UPI000003EAC2	Protein translocase subunit SecY	--	48.511	13.8	9	9	15	1.012	0.947	1.043	1.011	1.022	0.934	0.988	0.785369
UPI0000031A36	Disulfide bond formation protein B	--	20.142	18.8	3	3	7	1.062	0.959	1.022	1.041	0.926	0.972	0.966	0.480884
UPI000013ABC0	Probable transcriptional regulatory protein YebC	--	26.422	29.3	7	7	18	1.029	0.998	0.979	0.973	1.007	1.027	1	0.989684
UPI00001292FA	Glutamate dehydrogenase	--	48.581	46.1	18	18	39	1.08	1.13	1.127	0.872	0.834	0.915	0.785	0.00136853
UPI000004C26F	Chaperone protein DnaK	--	69.114	65.4	38	38	254	0.907	0.896	0.883	1.104	1.112	1.091	1.231	2.61551e-05
UPI0001B88F7D	Insulinase family protein	--	104.17	18.2	14	14	18	0.952	0.948	0.996	0.944	1.076	0.968	1.032	0.526097
UPI000012AB27	Fumarate and nitrate reduction regulatory protein	--	27.967	23.6	5	5	17	1.028	1.066	0.994	1.053	0.93	1.007	0.968	0.469703
UPI000013B1E3	p-hydroxybenzoic acid efflux pump subunit AaeA	--	34.774	6.1	2	2	2	0.538	0.611	0.563	1.478	1.388	1.412	2.499	2.5282e-05
UPI0000136130	DNA-binding protein	--	15.347	65.7	9	8	32	0.882	0.852	0.835	1.106	1.176	1.201	1.356	0.000496167
UPI000013B51F	Pseudouridine synthase	--	32.476	25.2	9	9	12	1.049	1.148	1.131	0.837	0.879	0.972	0.808	0.0146055
UPI0000125C13	FAD:protein FMN transferase	--	38.548	2.6	1	1	1	0.893	0.984	1.053	1.013	1.165	0.909	1.054	0.598382
UPI00000D0D9C	Oxidoreductase, Fe-S subunit	--	22.752	31.7	6	3	12	0.796	0.817	0.756	1.168	1.153	1.23	1.499	0.000178217
UPI00001118F3	Catalase	--	84.162	46.7	34	34	92	1.137	1.15	1.157	0.833	0.855	0.824	0.729	1.27933e-05
UPI000013C3EF	Zinc transporter ZitB	--	34.678	5.8	1	1	3				0.981	1
UPI000012F09E	2,3-dihydroxyphenylpropionate/2,3-dihydroxicinnamic acid 1,2-dioxygenase	--	34.196	30.6	7	7	17	0.14	0.224	0.236	1.541	1.677	1.56	7.963	0.000236313
UPI000012DD90	Potassium efflux system KefA	--	127.21	25.4	24	24	37	0.984	0.958	1.019	1.095	0.962	1.014	1.037	0.443313
UPI0000127BE1	2',3'-cyclic-nucleotide 2'-phosphodiesterase	--	70.831	50.9	30	30	68	0.944	0.982	0.968	1.016	1.047	1.044	1.074	0.00903439
UPI000013232E	Glycine/betaine ABC transporter substrate-binding protein	--	36.022	10	2	2	4	1.135	1.031	0.925	0.968	0.935	1.018	0.945	0.448984
UPI000012CDF9	Protease HtpX	--	31.923	20.5	4	4	9	1.011	0.95	0.949	0.986	1.027	1.019	1.042	0.164848
UPI000012D5C0	Transcriptional activator of ilvC	--	33.204	21.9	6	6	8	1.066	0.98	1.035	0.966	0.958	1.028	0.958	0.268122
UPI000012B565	Glycolate oxidase, iron-sulfur subunit	--	45.11	31.9	11	11	18	1.072	1.032	1.123	0.918	0.957	0.906	0.862	0.00731623
UPI000013A2BD	Predicted transporter	--	45.658	6	2	2	5	0.784	0.833	0.906	1.268	1.128	1.084	1.379	0.00700776
UPI000013A38C	Inner membrane protein ybjJ	--	41.852	5	2	2	2	1.441	1.113	1.075	0.62	0.674	1.095	0.658	0.0915005
UPI000013308B	DNA repair protein RadA	--	49.472	25.4	10	10	18	1.019	0.916	0.909	1.016	1.044	1.055	1.095	0.0748183
UPI0000111574	Lactoylglutathione lyase (Fragment)	--	14.92	56.3	7	7	12	0.972	1.013	0.992	0.976	0.99	1.027	1.005	0.798264
UPI000013A60D	UPF0502 protein YceH	--	24.177	68.8	12	12	30	0.933	0.97	0.929	1.036	1.047	1.054	1.108	0.00218493
UPI000013B572	Probable L-ascorbate-6-phosphate lactonase UlaG	--	40.06	2.3	1	1	1
UPI000013BB1C	Bacterial regulatory helix-turn-helix, lysR family protein	--	32.483	16.4	3	3	3	0.928	1.143	1.097	0.925	0.891	1.036	0.9	0.257517
UPI0000128FCA	Lysine decarboxylase, constitutive	--	80.589	14.4	9	9	14	1.088	1.016	0.971	1.01	1.011	0.948	0.966	0.430702
UPI0000168002	Polyamine aminopropyltransferase	--	32.321	35.4	7	7	21	0.986	1.008	1.03	1.004	1	1.05	1.01	0.651657
UPI000013A376	Sugar phosphatase	--	30.412	36.5	8	8	11	0.974	1.01	0.935	0.986	1.032	1.04	1.048	0.168128
UPI000013A97E	Putative selenium-binding protein YdfZ	--	7.2763	77.6	5	5	11	0.783	0.829	0.766	1.185	1.27	1.19	1.533	0.000194054
UPI000013A91E	DUF218 domain-containing protein	--	29.705	31.2	6	6	16	0.934	1	0.966	1.047	1.01	1.091	1.086	0.0511464
UPI00003B25FE	Formate acetyltransferase	--	85.935	49.3	34	31	111	0.974	0.953	0.936	1.039	1.046	1.05	1.095	0.00158398
UPI000003EB3E	Membrane protein insertase YidC	--	61.525	20.4	11	11	34	1.018	1.027	1.046	1.013	0.934	0.93	0.931	0.06645
UPI0000137097	Tryptophanase	--	52.773	60.5	27	27	197	1.069	1.063	1.075	0.95	0.932	0.933	0.878	4.88936e-05
UPI000013A696	Putative fumarylacetoacetate isomerase/hydrolase	--	23.711	32.4	5	5	16	1.066	1.081	1.038	0.909	0.927	0.972	0.882	0.00552316
UPI00001260C3	Arginine transport ATP-binding protein ArtP (Fragment)	--	27.022	37.2	6	6	18	0.998	1.02	0.988	0.989	0.967	0.981	0.977	0.11361
UPI000013B1BD	RNase adapter protein RapZ	--	32.492	37	11	11	19	0.97	0.925	0.986	1.052	1.063	1.061	1.102	0.00728881
UPI00005F1105	Tol-Pal system protein TolQ	--	25.25	25.1	6	6	9	1.042	0.974	0.964	1.04	0.996	0.99	1.015	0.616487
UPI000013ABE4	PF10964 family protein	--	9.1225	84.3	5	5	11	1.031	1.001	1.06	0.882	0.982	0.981	0.92	0.0985936
UPI000013B6E8	Putative pyridine nucleotide-disulfide oxidoreductase YkgC	--	48.244	32.4	11	11	23	1.042	1.034	1.013	0.975	0.934	0.98	0.935	0.0182644
UPI000013B219	Hydrolase, alpha/beta domain protein	--	38.495	6.2	2	2	2	0.952	0.923	1.12	0.974	1.076	0.97	1.008	0.882936
UPI000013BC96	ABC transporter ATP-binding protein YojI	--	61.552	4.6	2	2	2	0.888	1.084	1.005	1.108	1.03	0.898	1.02	0.831579
UPI00001286FA	Cu(+)/Ag(+) efflux RND transporter permease subunit CusA	--	114.71	1.9	2	2	2	1.036	1.07	1.008	0.877	1.046	0.982	0.933	0.256976
UPI000013B24E	PF06611 family protein	--	10.252	11.2	1	1	1
UPI0000136DCF	Thiamine-phosphate synthase	--	23.015	44.5	7	7	24	1.033	1.075	1.024	0.98	0.948	0.982	0.929	0.0175195
UPI0000129E3F	Ribonuclease BN	--	32.929	32.1	7	7	10	1.009	0.995	1.208	0.9	0.946	0.943	0.868	0.100044
UPI000011227A	3-keto-L-gulonate-6-phosphate decarboxylase UlaD	--	23.578	6.5	2	2	2	1.008	1.008	0.931	0.904	1.108	1.06	1.042	0.597609
UPI000013B3BC	Unassigned protein	--	24.169	7.8	2	2	2	0.983	0.973	1.004	1.024	0.946	1.079	1.03	0.512316
UPI000012FD66	Cytochrome c-type protein	--	23.1	40	7	7	15	0.911	0.985	0.985	1.077	0.985	0.972	1.053	0.282617
UPI000013A36B	Conserved protein	--	9.7557	31.8	3	3	5	1.156	1.05	1.032	0.841	0.945	0.977	0.853	0.0503009
UPI000013B095	Ribosomal RNA small subunit methyltransferase E	--	26.978	64.6	10	10	19	1.033	1.045	1.006	0.996	0.971	0.982	0.956	0.02929
UPI000016815A	Sulfite reductase [NADPH] hemoprotein beta-component	--	63.997	15.1	8	8	12	0.724	0.808	0.765	1.285	1.252	1.242	1.645	0.000115928
UPI000013A9F1	Predicted kinase	--	34.121	10.8	3	3	3
UPI0000138EE2	Undecaprenyl-phosphate alpha-N-acetylglucosaminyl 1-phosphate transferase	--	40.957	7.4	3	3	4	0.88	0.898	1.112	1.095	1.093	0.896	1.067	0.54377
UPI000013B00E	CinA domain-containing protein	--	17.582	61.8	9	9	20	0.996	1.052	0.972	0.992	0.994	1.01	0.992	0.772001
UPI000016546D	Spermidine acetyltransferase	--	21.887	54.3	10	10	31	0.956	0.929	0.918	1.023	1.042	1.066	1.117	0.00283136
UPI00005F153B	Diguanylate cyclase, csgD regulator	--	46.452	23.7	8	8	11	1.241	1.178	1.22	0.785	0.755	0.843	0.655	0.000288527
UPI0000047CBB	50S ribosomal protein L20	--	13.497	43.2	8	8	13	0.929	0.966	1.004	1.115	1.1	0.931	1.085	0.272866
UPI000003EAC6	50S ribosomal protein L18	--	12.769	39.3	6	6	15	0.996	1.015	1.044	1.01	0.968	0.972	0.966	0.143151
UPI000012A648	Ferrienterobactin-binding periplasmic protein	--	34.283	17.3	4	4	6	0.95	1.058	1.032	0.971	0.916	1.07	0.973	0.634137
UPI000003EB7E	D-ribose-binding periplasmic protein	--	30.95	68.6	16	16	83	0.954	0.986	0.932	1.024	1.026	1.083	1.091	0.0240865
UPI00001588E1	Homoserine O-succinyltransferase	--	35.727	13.6	4	4	6	0.828	0.884	0.906	1.233	1.111	1.042	1.293	0.0102631
UPI000011179B	L-fuculose phosphate aldolase	--	23.775	16.3	3	3	3	0.93	0.985	0.957	1	1.014	1.125	1.093	0.0972279
UPI000012E6ED	Octanoyltransferase	--	23.882	28.6	4	4	9	1.055	0.993	1.002	0.932	1.007	1.036	0.975	0.526144
UPI0000047C61	5-keto-4-deoxy-D-glucarate aldolase	--	27.384	30.5	8	8	19	1.032	0.966	0.991	0.954	0.992	1.025	0.994	0.839893
UPI00001380B9	ABC transporter maintaining OM lipid asymmetry, OM lipoprotein component	--	28.041	23.1	5	5	8	0.988	0.974	1.004	1.211	0.963	0.825	1.011	0.990605
UPI000012B56C	Glycerol dehydrogenase	--	38.712	28.3	9	9	24	0.893	0.94	0.892	1.144	1.128	1.026	1.21	0.00770667
UPI000016F3EF	Glycerol-3-phosphate acyltransferase	--	91.38	42.5	27	27	58	0.967	0.971	0.996	1.038	1.017	1.033	1.052	0.00995895
UPI000003EB76	Bifunctional glutamine synthetase adenylyltransferase/adenylyl-removing enzyme	--	108.42	27.7	18	18	30	0.99	0.974	0.977	1.005	1.03	1.062	1.053	0.0370328
UPI0000033838	Aspartokinase	--	48.531	33	11	11	16	0.835	0.873	0.883	1.208	1.08	1.189	1.342	0.0016638
UPI0000047C78	Oxidative stress defense protein	--	26.635	40.7	11	11	53	0.955	0.929	0.916	1.043	1.054	1.081	1.135	0.00144725
UPI00001110EB	Deoxyuridine 5'-triphosphate nucleotidohydrolase	--	16.286	26.3	3	3	7	1.043	0.903	0.932	1.038	1.062	1.029	1.087	0.128712
UPI000013B82B	Diguanylate cyclase (GGDEF) domain protein	--	49.872	13.1	5	5	5	0.768	0.832	0.893	1.148	1.235	1.134	1.411	0.00249304
UPI0000125397	Efflux pump membrane transporter	--	113.57	30.6	27	27	85	1.03	1.007	1.058	1.006	0.963	0.937	0.939	0.0656822
UPI0000136D9E	Phosphomethylpyrimidine synthase	--	70.85	40.6	22	22	79	1.131	1.116	1.149	0.862	0.878	0.862	0.766	1.391e-05
UPI00001322F5	Pyrroline-5-carboxylate reductase	--	28.145	26.4	8	8	36	1.044	1.047	1.008	0.95	0.963	0.991	0.937	0.0203354
UPI0000111A1D	Flavohemoprotein	--	43.867	27	9	9	20	0.976	0.936	0.923	1.027	1.093	1.043	1.116	0.0121357
UPI000022647A	Cell division protein ZapB	--	9.4024	44.3	4	4	50	0.972	1.043	0.968	0.976	1.011	1.022	1.009	0.761433
UPI000013A2B3	Cys-tRNA(Pro)/Cys-tRNA(Cys) deacylase	--	17.093	38.4	5	5	12	0.963	0.958	0.947	0.998	1.073	1.052	1.089	0.0187844
UPI000005A4AC	30S ribosomal protein S21	--	8.4999	43.7	5	5	15	1.056	1.039	1.006	0.996	1.029	0.822	0.918	0.276358
UPI0000043B8D	DNA-binding response regulator in two-component regulatory system with BarA	--	23.892	51.8	10	10	16	1.094	1.126	1.106	0.889	0.907	0.903	0.811	3.59198e-05
UPI0000061478	Transcription termination/antitermination protein NusG	--	20.531	64.1	13	13	35	1.032	1.064	1.012	0.955	0.956	0.979	0.93	0.012149
UPI0000030D3B	Arabinose operon regulatory protein	--	33.384	13.7	3	3	3	1.047	1.036	1.212	0.912	0.919	0.891	0.826	0.0215433
UPI0000137B25	Bacterial regulatory s, tetR family protein	--	21.799	47.4	8	8	10	1.044	1.064	1.007	0.951	0.88	0.982	0.903	0.0474406
UPI000003EB43	Stress response kinase A	--	38.12	29.9	9	9	15	1.002	1.04	1.025	0.98	0.931	1.03	0.959	0.242083
UPI000005A541	Rod shape-determining protein MreB	--	36.952	53.9	18	18	65	1.015	1.023	1.036	0.977	0.984	0.951	0.947	0.0106107
UPI000013A089	Addiction module toxin component, YafQ family	--	10.846	9.8	1	1	1	0.932	1.042	0.958	1.094	0.956	1.027	1.049	0.40431
UPI000003EB7F	Ribokinase	--	32.29	28.5	7	7	20	0.985	0.973	0.987	0.964	1.126	0.995	1.048	0.405803
UPI00000480DB	Galactose ABC transporter, periplasmic galactose-binding protein	--	35.712	75	26	26	175	1.037	1.054	1.023	0.925	0.962	1.002	0.928	0.0375904
UPI000012C655	Transcriptional regulator, RpiR family	--	31.975	32.9	7	7	12	1.07	1.057	0.969	0.973	0.999	0.958	0.946	0.180638
UPI0000112D97	L-threonine dehydratase	--	56.195	32.1	13	13	18	1.014	0.992	0.988	1.038	1.012	0.978	1.011	0.592561
UPI000013A35B	Cardiolipin synthase B	--	47.633	17.4	6	6	7	1.11	1.034	1.039	0.906	1.008	0.938	0.896	0.0470013
UPI0000047C73	Glyco_trans_2-like domain-containing protein	--	34.635	5.2	2	2	2	1.026	0.922	1.007	1.026	1.05	0.979	1.034	0.431847
UPI0000110AAB	Carbamoyl-phosphate synthase large chain	--	117.84	34.1	33	33	65	1.002	1.02	1.011	0.995	0.993	1.006	0.987	0.119114
UPI000012A259	Cryptic autophosphorylating protein tyrosine kinase	--	81.241	1.2	1	1	1
UPI000013AE08	Uncharacterized MFS-type transporter YfcJ	--	40.465	2.3	1	1	1	0.713	0.954	0.91	1.236	1.262	0.936	1.333	0.0961131
UPI000012F4C8	Probable malate:quinone oxidoreductase	--	60.229	1.6	1	1	1	1.454	1.468	1.396	0.465	0.515	0.739	0.398	0.0026436
UPI000012B742	Glutamine transport ATP-binding protein GlnQ	--	26.731	27.9	5	5	27	1.048	1.052	1.044	0.97	0.98	0.913	0.911	0.0132843
UPI0000043B82	Formamidopyrimidine-DNA glycosylase	--	30.29	41.3	8	8	11	1.046	1.001	1.059	0.998	0.93	0.996	0.941	0.103174
UPI000004750A	Phosphoanhydride phosphorylase	--	47.056	33.6	12	12	27	0.792	0.838	0.834	1.121	1.165	1.221	1.423	0.000324099
UPI00000480C1	Glutathione synthetase	--	35.56	50	15	15	35	0.975	0.969	0.958	1.018	1.041	1.035	1.066	0.00162354
UPI000011165E	o-succinylbenzoate synthase	--	35.476	14.7	5	5	8	0.974	1.02	1.082	0.944	0.976	0.991	0.946	0.181127
UPI0000127B9D	Cardiolipin synthase A	--	54.822	25.3	10	10	18	1.011	0.985	1.027	1.034	0.973	0.979	0.988	0.612142
UPI000012D164	HTH-type transcriptional regulator ArgP	--	33.471	29.3	7	7	12	0.966	0.996	0.992	0.915	1.011	1.008	0.993	0.831296
UPI000013B0A9	Oxidoreductase, short chain dehydrogenase/reductase family protein	--	31.488	49	14	14	32	1.083	1.05	1.032	0.969	0.954	0.943	0.906	0.00358416
UPI000013C13B	NAD(P)-dependent oxidoreductase	--	29.733	34.6	7	7	11	1.001	1.047	1.014	0.992	0.977	1.021	0.976	0.26972
UPI000011309E	3-oxoacyl-[acyl-carrier-protein] reductase	--	25.56	52	8	8	29	0.96	1.029	1.012	0.94	1.031	1.015	0.995	0.886473
UPI00000480D0	Isopentenyl-diphosphate Delta-isomerase	--	20.508	16.5	2	2	8	1.021	0.982	1.038	0.961	1.05	0.983	0.985	0.635198
UPI00001253A1	Transcriptional regulator AcrR	--	24.766	16.3	3	3	3	1.027	1.026	0.973	0.92	0.981	1.088	0.988	0.795795
UPI00001361DA	Inositol-1-monophosphatase	--	29.172	55.8	17	17	48	1.046	1.05	0.976	0.963	0.957	1.006	0.952	0.164528
UPI0000125DAE	Carbamate kinase	--	33.071	17.4	5	5	5	0.989	1.075	1.108	0.943	0.892	0.929	0.871	0.0224017
UPI0000137D5E	Uracil permease	--	45.06	7.2	2	2	4	1.014	1.007	1.146	0.97	0.916	0.962	0.899	0.0834846
UPI0000125A52	Alpha-amylase	--	56.639	32.3	13	13	39	1.208	1.24	1.184	0.784	0.82	0.802	0.662	2.47774e-05
UPI000013A0B3	Predicted oxidoreductase with FAD-binding domain	--	33.857	35.2	9	9	13	1.169	1.03	0.982	0.892	1.045	0.866	0.881	0.17884
UPI0000138EE9	UDP-N-acetyl-D-mannosamine dehydrogenase	--	45.838	33.6	12	12	24	1.078	1.034	1.039	0.934	0.969	0.944	0.904	0.00405958
UPI000013AC01	Sensor protein	--	50.849	15.9	6	6	6	0.948	0.892	0.972	1.082	1.063	1.068	1.143	0.00678586
UPI0000134A52	Ribosomal RNA large subunit methyltransferase A	--	30.419	18.6	5	5	6	1.023	1.003	1.048	0.932	1.038	0.974	0.958	0.261951
UPI000761D109	Peptide chain release factor 2	--	37.287	33.7	12	12	27	0.978	0.948	0.972	1.04	1.046	1.019	1.071	0.00509953
UPI00021BA35B	Exodeoxyribonuclease I	--	54.369	35.7	14	14	25	0.937	0.939	0.965	0.99	1.049	1.079	1.098	0.0268136
UPI000012971C	DNA polymerase III subunit gamma/tau	--	71.137	33.3	22	22	31	0.94	0.97	0.964	1.063	1.02	1.05	1.09	0.00518434
UPI0000132A55	Phosphoribosylformylglycinamidine synthase	--	141.4	36.1	35	35	65	0.993	0.982	0.957	1.019	1.005	1.028	1.041	0.0345775
UPI000012C4B2	Oxygen-dependent coproporphyrinogen-III oxidase	--	34.322	16.1	4	4	6	0.838	1.114	0.999	1.009	1.055	1.004	1.04	0.619057
UPI0000163A46	Glutamine synthetase	--	51.903	57.4	22	22	125	1.015	0.993	1	0.998	0.977	1.007	0.991	0.474277
UPI000013BF18	Esterase yqiA	--	21.641	5.2	1	1	1	1.064	1.116	0.864	0.896	1.074	1.001	0.976	0.835182
UPI000012F69C	Putative acidic protein MsyB	--	14.259	31.5	3	3	18	1.128	1.098	1.101	0.859	0.888	0.897	0.795	0.000124467
UPI000003EB5E	Ribosomal RNA small subunit methyltransferase H	--	34.877	24.9	7	7	13	0.992	0.988	0.969	0.981	0.976	1.034	1.014	0.523133
UPI000012B377	Glycine cleavage system transcriptional activator	--	34.401	20.3	5	5	8	0.921	0.916	1.017	1.148	1.047	0.994	1.117	0.111041
UPI000003EB07	Glutamate 5-kinase	--	39.056	52.6	17	17	37	0.963	0.93	0.957	1.034	1.07	1.073	1.115	0.00247647
UPI000013A990	Oxidoreductase	--	38.257	37	10	10	17	1	0.94	1.018	0.974	0.96	1.05	1.009	0.827651
UPI0000137136	DNA topoisomerase 1	--	97.349	46.6	35	35	93	1.019	1.006	0.998	1.006	0.974	1.011	0.989	0.460502
UPI000013B051	Ribosomal RNA large subunit methyltransferase M	--	41.905	33.3	10	10	21	0.979	0.996	0.954	1.041	0.998	1.019	1.044	0.0690853
UPI000013BF23	Protein yqjC	--	13.906	24.6	5	5	7	1.088	1.062	1.006	0.863	1.011	1.003	0.912	0.169037
UPI000012EE6C	Multidrug ABC transporter ATP-binding protein	--	65.222	7.3	4	4	4	0.964	0.963	0.946	1.13	0.958	1.044	1.09	0.155178
UPI000013A9C2	Putative oxidoreductase Fe-S subunit	--	25.092	25.2	6	6	7	0.94	1.246	1.285	0.784	0.505	1.264	0.736	0.264393
UPI000013AE2B	PF10065 family protein	--	30.442	33.2	7	7	15	0.966	0.862	0.926	1.112	1.051	1.154	1.204	0.0122519
UPI000013A9F3	Alcohol dehydrogenase	--	37.7	13.3	4	4	4	0.972	1.093	0.974	0.971	0.945	1.06	0.979	0.711722
UPI000013BED7	Flavodoxin	--	16.274	27.5	3	3	8	0.954	1.05	1.004	0.996	1.014	1.024	1.009	0.763262
UPI0000127B3A	ATP-dependent Clp protease proteolytic subunit	--	23.186	26.6	5	5	33	1.063	1.064	1.003	0.946	0.971	0.97	0.922	0.0194586
UPI000013B24C	ABC-2 type transporter	--	41.061	5.3	2	2	2	1.159	0.979	1.188	0.873	0.995	0.822	0.809	0.0629992
UPI000012D00F	Hydroxypyruvate isomerase	--	29.377	69	15	15	76	0.925	0.938	0.922	1.061	1.084	1.076	1.157	5.96579e-05
UPI0000135763	Protein translocase subunit SecA	--	102.02	48.6	42	40	108	0.969	0.952	0.984	1.038	1.017	1.024	1.06	0.00669514
UPI0000683EA8	Carbon starvation protein A	--	77.323	8.5	6	6	10	1.005	1.063	1.004	1.044	0.936	0.935	0.949	0.263855
UPI00003B25F9	Beta-galactosidase	--	117.88	17.8	15	15	21	1.054	1.007	1.05	0.958	0.919	0.977	0.917	0.0204992
UPI000013B1CF	GTPase Obg	--	43.285	23.6	7	7	15	1.064	1.058	1.074	0.976	0.912	0.988	0.9	0.0137258
UPI000013582D	Selenide, water dikinase	--	36.687	57.1	14	14	42	0.995	0.994	0.942	1.012	1.023	1.065	1.058	0.0780517
UPI0000113221	Stress-response protein	--	8.3252	65.2	7	7	51	1.143	1.169	1.08	0.853	0.882	0.877	0.77	0.0005324
UPI000013A03F	Polysaccharide deacetylase	--	46.315	7.1	3	3	3
UPI000013ADD3	Undecaprenyl-phosphate 4-deoxy-4-formamido-L-arabinose transferase	--	36.339	25.8	7	7	15	1.156	1.207	1.076	0.839	0.876	0.886	0.756	0.00173732
UPI0000130A2E	Nucleoside permease	--	43.475	10.5	4	4	13	0.947	0.875	1.099	1.104	0.977	1.004	1.056	0.491772
UPI0000163A4F	ATP-dependent protease subunit HslV	--	19.093	28.4	6	6	26	0.967	0.993	0.937	0.997	1.052	1.045	1.068	0.0507034
UPI000013B09E	YggT family protein	--	21.167	5.3	1	1	1	0.998	0.872	0.949	1.17	1.001	1.012	1.129	0.132435
UPI0000165391	RNA polymerase-associated protein RapA	--	109.77	32.1	30	30	60	0.978	0.984	1.012	1.021	1.011	0.982	1.013	0.444305
UPI00001654E0	Glycine cleavage system H protein	--	13.811	7	2	2	4	1.302	0.812	0.927	1.099	1.121	0.736	0.972	0.901371
UPI0000134285	LPS-assembly lipoprotein LptE	--	21.356	45.6	10	10	17	0.946	0.901	0.962	1.187	1.052	0.932	1.129	0.182792
UPI000013B402	Sulfofructosephosphate aldolase	--	31.983	13	4	4	5	0.948	0.999	0.999	1.022	1.017	1.085	1.06	0.0974628
UPI000016825E	Putative transporter	--	139.05	17.3	16	16	19	1.014	1.066	1.008	0.996	0.973	0.988	0.958	0.0861998
UPI000013B7F8	DUF1116 domain-containing protein	--	44.978	8.6	4	4	4	0.751	0.826	0.88	1.302	1.156	1.086	1.442	0.00654092
UPI000012D579	Dihydroxy-acid dehydratase	--	65.531	27.9	16	16	33	1.035	1.038	1.009	0.944	0.941	1.031	0.946	0.146617
UPI0000126933	ATP-dependent dethiobiotin synthetase BioD	--	24.981	18.2	3	3	10	0.888	0.936	0.897	1.088	1.054	1.1	1.191	0.00104599
UPI000013B82C	Ribosomal protein S12 methylthiotransferase RimO	--	49.581	47.4	18	18	35	1.021	1.054	1.046	0.976	0.954	0.965	0.928	0.0029588
UPI000012D9CB	Probable intracellular septation protein A	--	20.79	4.5	2	2	2
UPI0000683E91	Acetylglutamate kinase	--	27.028	30.4	6	6	9	1.036	1.035	0.994	0.97	1.083	0.959	0.983	0.671442
UPI000012AF1D	Glucose-6-phosphate 1-dehydrogenase	--	55.704	50.3	24	24	61	0.992	0.98	0.968	1.033	1.015	1.02	1.044	0.0083609
UPI000013A375	DUF1479 domain-containing protein	--	47.329	25.4	9	9	16	1.084	1.169	1.064	0.919	0.868	0.907	0.812	0.00347529
UPI0000046BF7	S-(hydroxymethyl)glutathione dehydrogenase	--	39.359	36.3	12	12	24	0.985	0.991	1.046	1.002	1.033	1.008	1.007	0.751639
UPI000013A2E0	HTH araC/xylS-type domain-containing protein	--	30.84	4.5	1	1	1	1.321	0.895	0.672	1.24	0.932	0.928	1.073	0.670363
UPI000013B24D	PanD regulatory factor	--	14.505	22.8	2	2	3	0.938	1.031	1.056	0.99	0.988	1.032	0.995	0.925293
UPI0000168232	Anaerobic ribonucleoside triphosphate reductase	--	80.022	37.2	21	21	41	0.877	0.88	0.884	1.128	1.091	1.143	1.273	6.74399e-05
UPI000012DD7F	2-deoxy-D-gluconate 3-dehydrogenase	--	27.07	27.7	7	7	9	0.99	1.029	1.06	1.037	1.032	1.04	1.01	0.639174
UPI000013BC58	Endoribonuclease L-PSP	--	12.493	40.4	4	4	10	0.989	1.038	1.008	0.952	1.029	0.948	0.965	0.297474
UPI000011207E	Molybdopterin synthase sulfurylase MoeB	--	26.719	30.1	6	6	9	1.016	1.005	0.983	0.955	1.023	1.006	0.993	0.774463
UPI00001272D6	Heme exporter protein C	--	27.885	13.1	3	3	4	1.098	1.014	1.045	0.955	0.906	0.983	0.901	0.0349502
UPI000013A940	ABC transporter, ATP-binding protein	--	34.621	6.8	2	2	2
UPI00001321D4	DNA primase	--	65.564	21.9	13	13	19	1.007	1.05	1.011	0.996	0.933	1.014	0.959	0.215339
UPI000013A978	Putative an envelop protein	--	16.497	11	2	2	5	1.121	1.103	1.075	0.942	0.788	0.922	0.804	0.0184114
UPI000013AE57	Inner membrane protein	--	17.168	9.4	1	1	1	1.051	1.083	0.96	1.12	0.908	0.884	0.941	0.477656
UPI000013A58F	Peptidase, M48B family	--	26.74	13	2	2	2	1.025	0.884	1.04	1.041	0.989	1.029	1.037	0.511202
UPI000013B015	Predicted inner membrane protein with hydrolase activity	--	18.639	19	3	3	6	0.911	0.908	0.968	1.096	1.018	1.037	1.131	0.0156679
UPI000013B0DC	Alpha-glucosidase	--	88.32	3.1	2	2	2	1.237	1.304	0.893	0.753	0.689	1.143	0.753	0.205472
UPI000013C434	Zn(II)-responsive transcriptional regulator	--	16.179	21.3	3	3	3	1.096	0.985	1.136	0.979	0.971	0.96	0.905	0.0848066
UPI0000047C64	Autoinducer 2 ABC transporter, permease protein LsrC	--	36.394	3.8	1	1	2	1.113	1.319	1.277	0.777	0.685	0.854	0.624	0.00458763
UPI0000129320	Quinoprotein glucose dehydrogenase	--	86.746	32.8	23	23	49	1.002	0.967	0.953	1.078	1.023	0.957	1.047	0.301085
UPI0001FB78FC	Sensor protein evgS	--	126.68	6.8	7	7	7	1.028	1.001	1.027	1.026	0.929	1.035	0.978	0.55573
UPI0000129B39	Cryptic beta-D-galactosidase, beta subunit	--	17.456	29.5	3	3	3	1.082	1.086	1.054	0.882	0.956	0.958	0.868	0.00777432
UPI000013ABE1	Universal stress protein	--	15.633	12.7	1	1	1	0.911	0.906	0.991	1.007	1.039	1.159	1.141	0.063586
UPI000013A5D7	Deferrochelatase/peroxidase	--	46.754	9.5	3	3	3	0.856	1.036	0.856	1.114	0.965	1.18	1.186	0.121542
UPI0000047C63	Putative ABC transporter ATP-binding protein ego (EGO10A)	--	55.821	21.1	10	10	13	1.197	1.151	1.116	0.871	0.82	0.861	0.737	0.000370489
UPI000012C339	3-phenylpropionate/cinnamic acid dioxygenase subunit beta	--	20.579	62.2	12	12	39	0.275	0.304	0.35	1.643	1.576	1.613	5.201	2.01128e-05
UPI000013A92C	ABC transporter periplasmic binding protein ydcS	--	42.295	74	21	21	55	1.301	1.294	1.306	0.69	0.692	0.716	0.538	8.87598e-07
UPI00001271C7	Curved DNA-binding protein	--	34.455	51.3	16	16	49	0.861	0.877	0.916	1.098	1.114	1.132	1.26	0.000342083
UPI0000124EE4	DNA-3-methyladenine glycosylase 1	--	21.1	10.2	2	2	3	1.004	1.072	1.059	0.932	0.938	1.012	0.919	0.0638952
UPI000012EB43	Maltodextrin-binding protein	--	43.387	58.1	22	22	99	1.123	1.13	1.098	0.852	0.908	0.918	0.799	0.000828686
UPI000018F8D2	dATP pyrophosphohydrolase	--	18.35	7.5	1	1	1	1.002	0.994	1.192	0.966	0.931	0.931	0.887	0.1268
UPI000013A36C	DUF1471 domain-containing protein	--	8.5676	32.6	2	2	4	0.424	0.453	0.52	1.512	1.547	1.533	3.287	3.89005e-05
UPI0000126990	Pimeloyl-[acyl-carrier protein] methyl ester esterase	--	28.505	12.5	3	3	5	0.992	1.032	0.966	1.024	1.058	0.943	1.012	0.796031
UPI0000111476	Formate-dependent phosphoribosylglycinamide formyltransferase	--	42.433	13.3	5	5	7	0.954	0.99	0.978	1.079	1.044	0.966	1.057	0.189047
UPI000012E8DC	UDP-3-O-acyl-N-acetylglucosamine deacetylase	--	33.956	25.2	8	8	15	1.124	1.145	1.113	0.875	0.871	0.905	0.784	7.67538e-05
UPI00001260FE	Beta-aspartyl-peptidase	--	33.394	5.3	1	1	1
UPI0000128582	Cold shock domain protein CspD	--	7.9689	41.9	2	2	5	1.083	1.122	1.249	0.833	0.886	0.909	0.761	0.00557235
UPI0000168100	Histidinol dehydrogenase	--	46.11	20.7	8	8	11	0.956	1.006	1.051	1.027	0.974	1.002	0.997	0.932912
UPI00001314AB	Transcriptional regulator PdhR	--	29.425	22.4	5	5	8	0.994	0.947	1.012	1.004	1.002	1.017	1.024	0.307486
UPI0000125396	MexE family multidrug efflux RND transporter periplasmic adaptor subunit	--	42.196	56.4	22	22	67	1.013	0.999	1.01	1.045	0.966	0.961	0.983	0.560272
UPI0000128DDA	D-alanyl-D-alanine carboxypeptidase DacC	--	43.608	56.5	19	19	59	1.02	1.008	1.015	0.966	0.986	0.992	0.967	0.0192468
UPI000013ABA4	AAA_PrkA domain-containing protein	--	74.479	55.7	32	32	145	1.094	1.082	1.067	0.929	0.93	0.914	0.855	6.85751e-05
UPI000013AB9E	DUF1315 domain-containing protein	--	10.338	32.2	3	3	5	1	1.078	1.035	0.931	1.003	1.004	0.944	0.154647
UPI0006ACF692	Sigma factor-binding protein Crl	--	13.747	29.1	3	3	10	1.143	1.198	1.106	0.836	0.83	0.873	0.737	0.00040333
UPI0000168159	Phosphoadenosine phosphosulfate reductase	--	27.975	36.5	8	8	13	0.832	0.788	0.874	1.084	1.144	1.216	1.381	0.0019534
UPI00003B2613	Acetyltransferase, GNAT family	--	18.622	21	3	3	3	0.929	1.004	0.76	1.109	1.025	1.177	1.229	0.0830652
UPI0000137175	Cytochrome c-type protein	--	43.606	40.3	15	15	37	0.138	0.211	0.215	1.813	1.726	1.636	9.176	0.000111298
UPI00001278B1	Toxin of the ChpA-ChpR toxin-antitoxin system, endoribonuclease	--	12.098	45	5	5	5	0.96	0.939	0.952	0.981	1.151	1.047	1.115	0.0848378
UPI0000113012	3-phosphoshikimate 1-carboxyvinyltransferase	--	46.095	34.7	13	13	22	0.973	0.928	0.967	1.031	1.065	1.075	1.106	0.00675874
UPI000012E93C	Transcriptional regulator LrhA	--	34.593	10.9	5	5	11	0.902	0.94	0.923	1.047	1.061	1.05	1.142	0.00045573
UPI00003B25F6	UPF0313 protein YgiQ	--	83.477	21.4	14	14	16	1.119	1.103	1.12	0.881	0.91	0.85	0.79	0.000314778
UPI000013ABB7	Predicted peptidase	--	25.181	27.3	5	5	7	1.003	1.036	1.098	0.916	0.894	1.07	0.918	0.230098
UPI0000683E82	PF07191 family protein	--	7.9942	54.9	3	3	4	0.931	1.066	1.023	1.021	1.039	0.974	1.005	0.901765
UPI0000673E4D	Putative peptidase	--	32.535	8.2	2	2	4	1.146	1.126	1.219	1.04	0.758	0.74	0.727	0.0421693
UPI000013A8F4	tRNA-cytidine(32) 2-sulfurtransferase	--	35.561	36.3	12	12	16	1.094	1.145	1.049	0.867	0.929	0.956	0.837	0.00980748
UPI000012F2DB	GTP 3',8-cyclase	--	37.346	12.5	4	4	4	0.944	1.007	1.106	0.851	1.042	1.072	0.97	0.716042
UPI000012E2D1	Muramoyltetrapeptide carboxypeptidase	--	33.567	19.1	4	4	8	0.876	1.018	1.049	1.062	1.052	0.967	1.047	0.489914
UPI000012F5DC	Large-conductance mechanosensitive channel	--	14.957	14.7	4	4	6	1.044	1.095	1.058	1.012	0.843	0.957	0.88	0.0790437
UPI000013A5CB	Protein YccU	--	14.701	50.4	5	5	12	1.002	1.093	1.045	0.975	1.014	0.888	0.916	0.131234
UPI000013AC30	Putative transport protein	--	59.45	8.7	6	6	8	1.007	1.01	0.963	1.063	0.993	0.932	1.003	0.97302
UPI000013B829	Putative cyclic diguanylate phosphodiesterase (EAL) domain protein	--	90.048	6.4	4	4	5	0.92	0.938	0.906	1.128	1.07	1.046	1.174	0.00286213
UPI0000043B89	Adenine DNA glycosylase	--	39.149	5.7	2	2	2	1.122	1.064	0.971	1.04	0.91	0.9	0.903	0.1771
UPI0000111441	Iron-sulfur cluster assembly protein CyaY	--	12.231	27.4	3	3	11	1.018	1.079	1.015	0.973	0.998	0.955	0.94	0.0602931
UPI000013B011	FCD domain protein	--	24.991	51.4	11	11	16	1.415	1.367	1.382	0.524	0.551	0.62	0.407	5.97238e-05
UPI0000000ED4	60 kDa chaperonin	--	57.328	58.9	28	28	437	0.902	0.893	0.892	1.092	1.115	1.098	1.23	8.59404e-06
UPI000003EAE8	30S ribosomal protein S10	--	11.735	48.5	5	5	29	1.014	1.066	1	0.968	0.963	0.994	0.95	0.0775415
UPI000012EEE5	1,4-dihydroxy-2-naphthoyl-CoA synthase	--	31.633	58.6	15	15	42	0.955	0.959	0.987	1.017	1.054	1.039	1.072	0.00901771
UPI00001343C4	Ribonuclease HII	--	21.526	44.9	7	7	9	1.141	1.217	1.167	0.792	0.793	0.871	0.697	0.000593923
UPI000013B06A	LysM domain protein	--	26.564	39	7	7	9	0.854	0.96	1.021	1.21	1.002	1.005	1.135	0.199226
UPI000013B55D	Small ribosomal subunit biogenesis GTPase RsgA	--	39.193	26.6	8	8	18	0.977	1.023	0.968	0.947	0.998	0.963	0.98	0.426765
UPI000012D040	Hydrogenase maturation factor	--	41.363	18.8	6	6	8	1.018	0.954	1.022	1.108	0.94	1.021	1.025	0.683887
UPI000012FD85	Nitrate reductase 1, beta subunit	--	58.066	55.1	28	21	77	0.934	0.927	0.976	1.074	1.081	1.016	1.118	0.0119061
UPI0000132068	Peptidyl-prolyl cis-trans isomerase	--	20.431	66.3	9	9	23	1.042	1.045	1.011	0.937	0.947	0.978	0.924	0.00891823
UPI000013A923	Putative transferase	--	35.849	3.4	2	2	2	1.078	1.036	1.14	0.909	0.937	0.917	0.849	0.00504747
UPI000012A642	Ferrous iron transport protein B	--	84.473	2.1	1	1	1
UPI000013A336	Predicted enzyme subunit	--	23.946	11.5	3	3	5	0.932	0.9	1.089	0.968	1.032	1.038	1.04	0.537312
UPI0000125350	4'-phosphopantetheinyl transferase	--	21.768	7.2	1	1	1
UPI0000135AEC	tRNA 5-carboxymethoxyuridine methyltransferase	--	29.814	8.4	2	2	3	0.954	0.983	0.96	0.973	1.081	1.058	1.074	0.101711
UPI000013A589	DNA internalization-related competence protein ComEC/Rec2	--	84.473	3.1	2	2	2	1.202	1.057	0.978	0.986	0.938	0.848	0.856	0.109336
UPI000012C58D	Menaquinone-dependent protoporphyrinogen IX dehydrogenase	--	21.226	31.5	5	5	10	1.008	0.989	1.02	1.002	0.997	0.954	0.979	0.296343
UPI0000111CDC	Branched-chain-amino-acid aminotransferase	--	34.093	35.6	9	9	21	1.024	1.06	1.039	0.948	0.947	0.956	0.913	0.000957537
UPI00001681C3	Nickel import ATP-binding protein NikD	--	26.82	13	3	3	3	1.031	1.094	1.127	0.935	0.92	0.91	0.85	0.00409406
UPI000013BB29	UPF0482 protein YnfB	--	12.909	46.9	7	7	12	0.906	0.97	0.95	1.054	0.99	1.03	1.088	0.0365884
UPI0000110E8E	Bifunctional: repressor of maltose regulon	--	43.641	22.3	8	8	19	0.978	0.96	0.96	1.006	1.048	1.014	1.059	0.0152026
UPI0000110426	Xanthine phosphoribosyltransferase	--	16.97	51.3	6	6	17	1.065	1.044	1.009	0.948	0.979	0.973	0.93	0.0177122
UPI000012F4B0	DNA-binding transcriptional repressor of microcin B17 synthesis and multidrug efflux	--	20.563	54.5	10	10	26	0.89	0.928	0.902	1.102	1.079	1.085	1.201	0.000189318
UPI000013A2B9	Transcriptional regulator, AsnC family	--	17.437	25	5	5	5	1.098	0.96	0.944	1.005	0.998	1.005	1.002	0.932575
UPI000016805B	Dimethylsulfoxide reductase	--	22.869	49.8	10	7	22	0.905	0.913	0.906	1.078	1.151	1.038	1.199	0.00396266
UPI000012BADA	Glycerate kinase 2	--	39.104	31.5	11	11	19	1.123	1.136	1.142	0.907	0.82	0.913	0.776	0.00192495
UPI0000133482	Sensor histidine kinase RcsC	--	106.51	8.9	7	7	8	0.995	0.985	1.098	0.927	1.009	0.992	0.951	0.316962
UPI000012F674	Peptide methionine sulfoxide reductase MsrB	--	15.451	81	8	8	12	0.982	0.984	1.048	0.96	0.987	1.036	0.99	0.75348
UPI000012EF08	Penicillin-insensitive murein endopeptidase	--	30.136	6.6	2	2	2	1.108	1.23	1.241	0.785	0.859	0.802	0.683	0.00111525
UPI000012B73F	Glutamine ABC transporter, permease protein	--	24.364	8.7	2	2	3	0.948	0.982	1.01	1.042	1.018	1.014	1.046	0.0906842
UPI0000131D5A	Polyribonucleotide nucleotidyltransferase	--	77.1	44.9	30	30	134	1.036	1.037	1.066	0.964	0.94	0.964	0.914	0.00199613
UPI000012A29F	HTH-type transcriptional regulator eutR	--	40.159	5.4	2	2	2	0.858	0.894	0.97	1.085	1.182	1.022	1.208	0.0272764
UPI000013B292	Inner membrane protein YhjD	--	37.911	11.9	4	4	5	1.082	1.09	0.989	0.938	0.938	0.973	0.901	0.0372069
UPI000016F2D9	protein McrC	--	41.726	3.9	2	2	2	0.522	0.546	3.674	0.513	0.349	0.46	0.279	0.264223
UPI0000000054	Aldehyde-alcohol dehydrogenase	--	96.126	57.1	45	45	242	1.047	1.027	1.019	0.974	0.971	0.968	0.942	0.00191164
UPI000003EADA	Protein TusB	--	10.718	12.6	1	1	1
UPI0000125CB0	Cytochrome bd-II oxidase, subunit II	--	42.423	1.9	1	1	1	0.767	0.923	0.884	1.128	1.215	1.095	1.336	0.0103226
UPI0000047C69	Cell division protein FtsZ	--	40.323	90.1	26	26	133	1.05	1.077	1.046	0.928	0.942	0.952	0.889	0.000574072
UPI0000168036	Primosomal replication protein N	--	20.375	25.1	5	5	6	0.98	0.975	0.987	1.015	0.991	0.993	1.019	0.0859993
UPI00000480B8	Acetyltransferase component of pyruvate dehydrogenase complex	--	66.095	57.5	29	29	169	0.932	0.923	0.935	1.073	1.078	1.072	1.155	4.48691e-06
UPI000012E6C7	Lipoyl synthase	--	36.071	58.6	22	22	43	1.008	0.987	1.034	0.97	0.978	1.024	0.981	0.425773
UPI000012BBB0	Glutamate--cysteine ligase	--	58.269	31.9	13	13	30	0.981	1.02	1.036	0.975	0.96	0.967	0.956	0.0548152
UPI0000125138	Amidohydrolase family protein	--	52.193	2.9	1	1	1
UPI0000163997	3-hydroxydecanoyl-[acyl-carrier-protein] dehydratase	--	18.969	53.5	10	10	37	1.019	1.03	0.995	0.966	0.98	0.978	0.961	0.0228366
UPI00000480CD	Tetratricopeptide repeat protein	--	17.666	15.2	2	2	3	0.966	1.143	0.989	0.954	0.912	1.053	0.942	0.435457
UPI0000163A04	Probable Fe(2+)-trafficking protein	--	10.952	86.8	12	12	50	0.965	0.985	0.957	1.009	1.032	1.052	1.064	0.0138377
UPI000013A35E	Transport permease protein	--	41.565	3.5	1	1	1	1.096	1	1.005	1.036	0.983	0.889	0.938	0.291669
UPI0000059AFA	Phosphohistidinoprotein-hexose phosphotransferase component of PTS system (HPr)	--	9.1193	78.8	6	6	43	0.957	0.964	0.929	1.005	1.023	1.081	1.091	0.0247066
UPI000012B595	Glycogen synthase	--	52.822	39	16	16	35	0.988	1.038	0.992	0.996	0.998	0.994	0.99	0.572543
UPI0000111A15	D-tagatose-1,6-bisphosphate aldolase subunit KbaY	--	31.293	30.1	6	6	8	0.947	0.928	0.953	1.141	1.08	1.049	1.156	0.00505092
UPI0000112442	Cysteine--tRNA ligase	--	52.202	37.3	18	18	62	1.045	1.079	1.019	0.975	0.944	0.983	0.923	0.0182159
UPI00001337A9	ADP-L-glycero-D-manno-heptose-6-epimerase	--	34.893	53.2	16	16	83	1.025	1	0.979	1.004	1.011	1	1.004	0.79337
UPI000013B0DF	Putative NAD(P)-dependent dehydrogenase	--	36.214	24.1	7	7	17	1.026	1.036	0.966	0.965	0.979	1.029	0.982	0.567162
UPI000012A536	Mannosyl-D-glycerate transport/metabolism system repressor mngR	--	28.273	30.4	5	5	6	0.98	1.029	0.896	0.975	1.054	1.041	1.057	0.298791
UPI000012BAD9	Glycerate kinase 1	--	38.734	23.6	7	7	14	1.09	1.066	0.992	0.906	0.952	0.974	0.9	0.0413438
UPI0000003DD5	IS1 orfA	--	9.9023	27.5	2	2	3	1.141	1.007	0.948	0.936	0.92	1.058	0.941	0.443479
UPI000003EAC4	50S ribosomal protein L30	--	6.5417	42.4	3	3	20	1.024	1.07	1.011	0.977	0.982	0.965	0.942	0.0290415
UPI000003419E	2-C-methyl-D-erythritol 2,4-cyclodiphosphate synthase	--	16.897	45.3	5	5	16	0.976	1.003	0.958	1.05	1.02	1.001	1.046	0.0815109
UPI000013ABDC	ABC transporter ATP-binding protein	--	27.677	6.4	2	2	3	0.825	0.9	1.33	1.127	1.062	0.771	0.969	0.91026
UPI0000000AA0	Universal stress protein	--	16.066	35.4	4	4	21	0.965	0.974	1.03	1.01	0.991	1.053	1.029	0.355346
UPI000012A4D3	Acyl-coenzyme A dehydrogenase (ACDH)	--	89.223	24.2	18	18	35	0.961	0.897	0.955	1.072	1.058	1.068	1.137	0.00450509
UPI000013198C	Phosphonoacetate hydrolase	--	12.345	51.4	6	6	22	1.105	1.116	1.058	0.901	0.922	0.92	0.837	0.000578504
UPI00000480C3	Methionine aminopeptidase	--	29.33	51.9	11	11	25	1	1.005	0.904	1.011	1.03	1.034	1.057	0.182929
UPI0000139056	Xylulose kinase	--	52.618	29.8	10	10	15	0.979	1.106	1.055	0.927	0.963	0.97	0.911	0.0729332
UPI000013B5B4	ATPase, activator of (R)-hydroxyglutaryl-CoA dehydratase	--	27.255	5.1	1	1	1	0.969	0.999	1.138	0.848	0.973	1.095	0.939	0.498082
UPI000013A609	7-methyl-GTP pyrophosphatase	--	21.691	47.9	9	9	19	1.009	1.062	0.997	0.979	0.957	1.021	0.964	0.245747
UPI0000059FA0	50S ribosomal protein L32	--	6.4463	61.4	4	4	24	1.023	0.925	0.968	1.01	1.089	0.964	1.05	0.348205
UPI000018F716	Extracytoplasmic function sigma factor YlaC	--	18.267	22.4	4	4	4	0.848	0.964	1.008	1.161	0.996	1.03	1.13	0.152557
UPI0000112664	Malonyl CoA-acyl carrier protein transacylase	--	32.417	37.2	7	7	36	1.027	1.023	1.012	0.97	1.004	1.003	0.972	0.0805484
UPI0000138FDD	Selenate reductase subunit YgfN	--	103.52	24.9	18	18	31	1.12	1.093	1.068	0.88	0.887	0.946	0.827	0.00204312
UPI000012D125	Small heat shock protein IbpB	--	16.093	21.8	3	3	8	0.924	1.112	1.154	0.921	1.001	1.002	0.917	0.324898
UPI000013B3FF	Alpha-glucosidase	--	77.274	2.8	2	2	2
UPI000012A918	Flagellar basal-body rod protein FlgG	--	27.744	5.4	1	1	1	1.287	1.403	1.461	0.577	0.699	0.61	0.454	0.000315196
UPI00005EFA1D	L-arabinose transport system permease protein AraH	--	34.211	15.2	5	5	8	1.18	1.113	1.449	0.874	0.77	0.598	0.599	0.0195565
UPI000012ECF5	Nucleoside triphosphate pyrophosphohydrolase	--	30.412	9.1	2	2	5	0.996	1.073	1.095	0.946	0.875	1.032	0.902	0.132689
UPI0000168011	Aminoacyl-histidine dipeptidase	--	52.915	39.6	17	17	77	0.944	0.928	0.933	1.058	1.066	1.048	1.131	6.35534e-05
UPI000012F560	Rod shape-determining protein MreC	--	39.53	39.2	10	10	13	0.997	1.018	1.022	1.003	0.968	1.041	0.992	0.718554
UPI000013AE80	Unassigned protein	--	20.23	9.5	2	2	2
UPI0000113122	Ferredoxin, 2Fe-2S type, ISC system	--	12.331	45.9	5	5	10	1.023	0.907	0.932	1.05	1.048	1.039	1.096	0.0637018
UPI000013B0A1	Heme chaperone HemW	--	42.584	3.7	2	2	3	0.97	0.886	1.093	1.065	0.977	1.02	1.038	0.569207
UPI00001B514B	Peptidyl-prolyl cis-trans isomerase	--	22.216	39.3	8	8	30	0.997	1.099	1.01	0.942	0.942	0.958	0.915	0.0472769
UPI000012E587	3-isopropylmalate dehydratase small subunit	--	22.487	10.9	2	2	2	1.127	0.973	1.094	1.031	0.913	0.869	0.881	0.132702
UPI000016F098	L-2-hydroxyglutarate dehydrogenase	--	46.081	34.4	11	11	20	1.384	1.39	1.359	0.694	0.596	0.576	0.451	0.000158072
UPI0000136F67	Trigger factor	--	48.192	61.6	29	29	171	1.033	1.028	1.027	0.97	0.971	0.976	0.945	2.66092e-05
UPI0000168173	Aminomethyltransferase	--	40.146	35.2	11	11	43	1.006	1.051	1.003	0.992	0.987	1.011	0.977	0.24308
UPI000013B554	Putative lipoprotein	--	11.958	36.8	3	3	12	1.032	0.951	0.976	1.167	1.02	0.909	1.046	0.621851
UPI000013AE78	Beta-barrel assembly-enhancing protease	--	53.907	37.4	13	13	21	0.976	0.946	0.975	0.971	1.072	1.055	1.069	0.109811
UPI000013471A	DNA-directed RNA polymerase subunit beta'	--	155.16	58.8	75	75	321	1.01	1.003	1.019	0.995	1.004	0.982	0.983	0.0978996
UPI000013ADE7	5'-deoxynucleotidase YfbR	--	22.708	37.2	6	6	10	1.012	1.016	1.03	0.987	0.972	1.032	0.978	0.297154
UPI000013A69B	Flagellar brake protein YcgR	--	27.857	7	2	2	2	1.166	1.525	1.39	0.689	0.608	0.657	0.479	0.0010817
UPI00001259D7	Beta-lactamase	--	41.555	29.4	11	11	13	1.018	1.007	1.027	1.01	1.004	1.017	0.993	0.368162
UPI000013B408	HAD hydrolase, family IA, variant 3	--	22.732	39.7	8	8	22	1.086	1.071	1.04	0.904	0.998	0.928	0.885	0.0189988
UPI000012679C	Sensory histidine kinase in two-component regulatory system with BasR	--	41.029	19.6	7	7	9	1.116	1.125	1.098	0.919	0.874	0.807	0.779	0.00283773
UPI000013B6EB	Putative amino acid dehydrogenase with NAD(P)-binding domain and ferridoxin-like domain protein	--	53.051	25.1	11	11	32	0.918	0.93	0.991	0.995	1.07	1.041	1.094	0.0470981
UPI000013AC7E	Putative hydrolase, inner membrane-associated	--	67.295	14	5	5	7	1.098	1.008	0.975	0.893	1.065	0.977	0.953	0.465972
UPI0000135F4E	ATP-dependent RNA helicase SrmB	--	49.914	41.4	16	16	47	0.993	1	0.94	1.023	1.022	1.009	1.041	0.111763
UPI000013ABED	Putative transporter subunit: permease component of ABC superfamily transporter	--	24.801	3.6	1	1	2
UPI000012597A	N-acetylmuramoyl-L-alanine amidase AmiB	--	47.985	27.6	9	9	12	1.033	1.007	1.04	0.918	0.958	1.024	0.942	0.140059
UPI000013B029	NAD-binding protein	--	30.751	28.8	6	6	11	0.898	0.895	0.925	1.038	1.141	1.063	1.193	0.00439926
UPI000012C337	3-phenylpropionate/cinnamic acid dioxygenase ferredoxin--NAD(+) reductase component	--	43.978	34.8	13	13	36	0.258	0.224	0.198	1.689	1.67	1.672	7.399	1.25747e-05
UPI0000125C79	Class B acid phosphatase	--	26.103	29.5	7	7	13	0.98	1.054	0.98	0.943	1.03	1.014	0.991	0.814341
UPI000012929D	Bacterial regulatory, Fis family protein	--	70.561	13.1	7	7	8	0.945	1.064	1.029	0.922	1.054	1.024	0.987	0.821294
UPI000016819D	Glutamate synthase, 4Fe-4S protein, small subunit	--	52.015	20.3	8	8	9	0.872	0.889	0.816	1.126	1.076	1.147	1.3	0.00122804
UPI00001681B3	Cell division protein DamX	--	46.161	24.1	12	12	39	0.986	0.992	1.015	1.002	1.03	0.96	1	0.977325
UPI000013AC57	ABC transporter substrate-binding protein	--	32.609	38.4	11	11	21	1.148	1.142	1.154	0.828	0.925	0.848	0.755	0.00112959
UPI0000167DB0	Cyclopropane-fatty-acyl-phospholipid synthase	--	43.909	39.8	13	13	27	0.912	0.971	0.96	1.049	1.01	1.1	1.111	0.0283946
UPI000013A9E3	Acid-inducible outer membrane protein	--	27.607	16.7	4	4	4	1.015	1.052	1.09	0.967	0.956	0.936	0.906	0.0120988
UPI0000139FFA	UPF0412 protein YaaI	--	14.481	16.4	2	2	2
UPI00001350AB	30S ribosomal protein S6	--	15.187	62.6	6	6	50	1.024	1.06	1.013	0.952	0.952	0.995	0.936	0.0302496
UPI000013A682	Bacterial regulatory protein, tetR family protein	--	23.361	17.6	4	4	5	0.869	0.863	1.22	1.129	1.187	0.743	1.036	0.887655
UPI0000136B4A	Putative endoribonuclease L-PSP	--	14.007	92.2	8	8	16	0.95	1.026	0.953	1.041	1.019	1.056	1.064	0.0833849
UPI000016EE0B	Putative arylsulfatase-activating protein aslB	--	46.513	2.4	1	1	1
UPI00001298ED	Thiol:disulfide interchange protein	--	27.495	48	11	11	21	1.044	1.068	1.03	0.896	0.965	0.997	0.91	0.0454963
UPI0000139FFB	Amino acid carrier family protein	--	51.662	1.5	1	1	1
UPI0000113056	Molybdopterin molybdenumtransferase	--	44.067	19.5	5	5	11	0.974	0.919	0.943	1.035	1.003	1.042	1.086	0.0157329
UPI000000E407	Phosphate acetyltransferase	--	77.171	44.3	29	29	144	0.957	0.959	0.949	1.054	1.037	1.047	1.095	9.02143e-05
UPI00001639B0	DNA-binding protein	--	15.539	66.4	10	9	95	1.023	1.051	0.939	0.952	0.984	1.006	0.976	0.574043
UPI000013AE84	TPR_21 domain-containing protein	--	22.176	53.4	9	9	28	1.046	1.021	1.023	1.014	0.985	0.966	0.96	0.0615848
UPI00005EE937	Glycoside hydrolase family 10 protein	--	43.757	7	2	2	2	0.453	0.713	0.772	1.258	1.723	1.096	2.104	0.0243869
UPI00001298D7	Thiol:disulfide interchange protein DsbD	--	61.794	4.8	3	3	4	0.992	0.993	1.016	1.07	0.966	0.999	1.011	0.754392
UPI000012FD5C	Periplasmic nitrate reductase	--	93.041	41.4	30	30	88	1.046	1.04	1.028	0.953	0.956	0.972	0.925	0.000618354
UPI0001DBCF1B	Glyceraldehyde-3-phosphate dehydrogenase C GapC	--	13.014	32	3	3	11	0.98	0.937	0.919	1.094	1.14	1.076	1.167	0.00380888
UPI000013B061	Aspartate/glutamate racemase	--	25.248	24.8	5	5	5	0.988	1.03	0.991	0.918	0.982	1.073	0.988	0.782644
UPI0000129521	Chromosomal replication initiator protein DnaA	--	52.55	47.5	22	22	38	0.99	1.029	1.014	1.011	0.99	0.982	0.984	0.308394
UPI000013A6D7	UPF0283 membrane protein YcjF	--	39.392	31.2	10	10	17	0.964	0.953	1.007	1.034	1.031	1.04	1.062	0.0237363
UPI0001746D7D	Glucans biosynthesis glucosyltransferase H	--	95.769	22.2	17	17	31	1.031	0.943	1.018	0.993	0.956	0.998	0.985	0.662834
UPI000012598A	AMP nucleosidase	--	53.994	38	16	16	32	0.936	0.952	0.976	1.032	1.053	1.072	1.102	0.00400886
UPI0000683E84	Putative sensor-like histidine kinase yfhK	--	53.33	5.3	2	2	2
UPI0000001093	Ribosome-associated protein	--	13.696	35	4	4	10	1.054	1.028	1.092	0.94	1.018	0.954	0.917	0.0454032
UPI000003061A	Glucosamine-6-phosphate deaminase	--	29.774	64.7	12	12	63	1.042	1.051	1.031	0.952	0.986	0.976	0.933	0.00413298
UPI00001128D0	Orotate phosphoribosyltransferase	--	23.567	39.9	6	6	17	1.052	1.02	1.038	0.954	0.976	0.994	0.94	0.0142466
UPI000003EB7D	Ribose ABC transporter, permease protein	--	33.451	8.7	3	3	5	0.851	0.989	0.99	1.117	1.018	0.998	1.107	0.167123
UPI0000125725	Alkyl hydroperoxide reductase, F52a subunit, FAD/NAD(P)-binding protein	--	56.176	47	22	22	69	0.924	0.931	0.927	1.062	1.061	1.09	1.155	9.33808e-05
UPI000013C146	ABC transporter substrate-binding protein	--	34.344	45	16	16	53	1.006	1.082	1.044	0.936	0.96	0.994	0.923	0.0424054
UPI000013BC7F	PF06930 family protein	--	21.69	3.6	1	1	1	1.093	1.017	0.976	1.036	1.024	0.864	0.948	0.45104
UPI000013BF9F	Semialdhyde_dh domain-containing protein	--	23.198	23.7	5	5	12	1.042	1.011	1.048	0.908	0.984	0.99	0.929	0.069539
UPI000012DC56	2-amino-3-ketobutyrate coenzyme A ligase	--	43.117	47.5	15	15	90	0.993	0.986	1.031	0.972	1.008	1.002	0.991	0.630572
UPI0000000D1D	Modulator protein MzrA	--	14.172	7.1	1	1	1
UPI000003EAF8	ATP synthase subunit a	--	30.303	17	5	5	15	0.988	1.004	0.98	1.006	0.991	0.904	0.976	0.501121
UPI000012BD9D	Putative glucarate dehydratase	--	48.849	26.7	8	7	17	0.998	1.081	1	0.99	0.992	0.929	0.945	0.175658
UPI00001342F6	Ribosome modulation factor	--	6.5074	40	3	3	15	1.066	0.92	0.96	0.981	1.101	1.006	1.048	0.442168
UPI000013B3CA	Colicin E2 tolerance protein	--	22.485	4.6	1	1	2	0.909	1.04	0.882	1.033	1.012	1.136	1.124	0.12964
UPI000012585C	Alkylated DNA repair protein AlkB	--	24.075	19.4	3	3	3	1.016	1.008	0.946	1.008	1.054	0.98	1.024	0.481561
UPI00001272E4	Heme lyase CcmF/NrfE family subunit	--	71.389	7.3	5	5	6	0.985	1.026	0.925	1.076	1.014	0.973	1.043	0.369531
UPI000013A0C0	Ankyrin repeat protein	--	21.687	15.4	3	3	3	1.205	1.158	1.18	0.84	0.816	0.818	0.698	1.69851e-05
UPI00001304CE	Anaerobic ribonucleoside-triphosphate reductase-activating protein	--	17.446	29.2	4	4	5	0.936	0.993	1.073	1.022	0.979	1.047	1.015	0.729321
UPI0001DB951F	UDP-N-acetylglucosamine 2-epimerase	--	40.572	27.7	9	9	22	1.019	0.968	0.979	1.021	1.031	1.044	1.044	0.0628727
UPI00025AAFD0	Helix-turn-helix domain-containing protein	--	33.743	10	3	3	5	1.044	0.986	1.089	0.994	0.942	0.972	0.932	0.101134
UPI0000F0AF4A	Aromatic amino acid transport protein AroP	--	49.558	4.4	3	3	6	1.121	1.025	1.001	1.02	0.876	0.916	0.894	0.116656
UPI000013AC75	Bacterial extracellular solute-binding s, 5 Middle family protein	--	69.668	14.7	10	10	13	0.918	1.013	0.984	0.95	0.982	1.01	1.009	0.789371
UPI000013B3E3	DUF484 domain containing protein	--	26.728	13.6	3	3	3	1.03	0.971	1.075	1.027	0.943	0.964	0.954	0.29453
UPI0000683E71	Putative NADP-dependent oxidoreductase yncB	--	37.609	47.2	11	11	23	1.062	1.082	1.06	0.928	0.915	0.964	0.876	0.00143087
UPI0000112E58	UDP-N-acetylglucosamine 1-carboxyvinyltransferase	--	44.817	48.4	20	20	56	1.024	1.013	1.025	0.968	0.999	0.967	0.958	0.0194777
UPI0000111D90	Integration host factor subunit beta	--	10.651	55.3	5	5	41	0.978	0.992	0.999	0.94	1.036	1	1.002	0.95904
UPI000012A294	Predicted chaperonin, ethanolamine utilization protein	--	30.082	11.2	3	3	3	0.916	1.021	1.07	0.94	1.062	1.01	1.002	0.967608
UPI000012A28E	Ethanolamine utilization aldehyde dehydrogenase	--	49.021	24.8	9	9	13	0.956	0.887	0.904	1.082	1.052	1.078	1.169	0.00290237
UPI000013AE13	UPF0115 protein YfcN	--	21.013	25.1	5	5	10	1.057	0.999	0.996	0.987	1.026	1.011	0.991	0.709231
UPI0000111277	Glucarate dehydratase	--	49.14	43.5	14	13	46	1.027	1.048	1.047	0.968	0.986	0.968	0.936	0.00182796
UPI000016551F	Glutaredoxin	--	9.1374	78.3	6	6	39	1.02	1.058	0.978	0.952	0.999	1.02	0.972	0.409642
UPI0000168008	UDP-3-O-(3-hydroxymyristoyl)glucosamine N-acyltransferase	--	36.038	36.7	9	9	18	1.018	1.021	0.978	0.983	1.004	1.003	0.991	0.598596
UPI000013B5AB	Putative GTPase	--	35.659	22.6	6	6	15	1.023	0.989	0.977	1.005	1	0.993	1.003	0.83349
UPI000013B05A	YgdI/YgdR family lipoprotein	--	7.8768	43.1	1	1	6	1.219	1.088	1.114	0.855	0.843	0.832	0.74	0.001069
UPI000012EE3B	Malate dehydrogenase	--	32.337	50.6	13	13	108	0.988	1.018	0.946	0.982	1.016	1.047	1.032	0.33187
UPI000012984C	Dipeptide transport ATP-binding protein DppD	--	35.844	49.2	14	14	28	1.199	1.214	1.251	0.799	0.766	0.816	0.65	4.33583e-05
UPI0000135A43	Peptidyl-prolyl cis-trans isomerase	--	20.853	46.4	5	5	27	1.024	1.038	1.071	0.974	0.938	0.984	0.924	0.016229
UPI000012B987	Glycerol-3-phosphate dehydrogenase [NAD(P)+]	--	36.361	30.4	7	7	23	0.945	0.993	0.996	1.007	1.033	1.047	1.052	0.067799
UPI0000132870	Phosphoenolpyruvate-protein phosphotransferase	--	63.561	61	32	31	134	0.979	0.978	0.973	1.023	1.015	1.022	1.044	0.000154251
UPI000011DB05	Thymidine phosphorylase	--	47.207	51.8	23	23	83	0.95	0.959	0.958	1.026	1.052	1.028	1.083	0.000733705
UPI000013B551	HTH-type transcriptional repressor NsrR	--	15.593	38.3	5	5	9	0.988	1.031	0.966	1.056	0.992	0.938	1	0.990977
UPI0000131D66	Predicted nicotinamide mononucleotide transporter	--	26.996	4.2	1	1	2	1.164	1.082	0.993	0.854	1.082	0.844	0.858	0.165884
UPI000013B9C2	Two-component-system connector protein YmgA	--	10.345	23.3	3	3	4	0.785	0.799	0.772	1.076	1.237	1.169	1.478	0.000733625
UPI0000131347	DNA topoisomerase 4 subunit B	--	70.243	40.3	24	24	49	1.032	1.001	1.009	1.002	0.973	1.005	0.98	0.209108
UPI0000130A08	NADH-quinone oxidoreductase subunit J	--	19.874	4.3	1	1	2	1.012	1.066	0.882	1.066	1.11	0.874	1.03	0.780113
UPI00001133D7	Ribosome-associated inhibitor A	--	12.784	46.9	4	4	32	1.006	1.001	0.922	0.93	1.045	1.06	1.036	0.527769
UPI0000165567	Peptide chain release factor 3	--	59.573	53.5	26	26	52	1.016	0.987	1.03	1.013	0.981	0.978	0.98	0.295388
UPI000012C592	Release factor glutamine methyltransferase	--	30.975	4.7	1	1	2	1.064	0.952	0.964	0.966	1.069	0.997	1.017	0.721794
UPI000013AE8B	Two-component system NtrC family response regulator GlrR	--	49.148	25.9	11	11	14	0.977	0.975	0.935	1.072	1.034	1.024	1.084	0.0155354
UPI0000163996	Putative lipoprotein	--	20.634	28.9	3	3	6	0.93	0.886	0.872	1.134	1.134	1.011	1.22	0.00996492
UPI0000136B44	Threonine/serine transporter TdcC	--	48.878	3.8	2	2	2
UPI000016810C	Interrupted molybdate metabolism regulator	--	30.612	3.6	1	1	1	1.095	0.918	0.801	1.104	1.1	0.985	1.133	0.249148
UPI000013B531	EAL domain-containing protein	--	60.801	4.5	2	2	4	0.978	1.004	0.984	1.142	0.988	0.91	1.025	0.776953
UPI00001639C0	Superoxide dismutase	--	21.265	66.3	10	10	71	0.977	0.992	0.948	1.025	1.04	1.053	1.069	0.0124097
UPI000013428A	Pseudouridine synthase	--	36.026	32.3	12	12	21	0.883	1.041	0.916	0.972	1.087	1.059	1.098	0.190807
UPI000013BB30	Oxidoreductase, membrane subunit	--	30.523	2.5	1	1	1
UPI000013ABD0	Putative cytoplasmic protein	--	8.7527	23.1	2	2	7	1.114	1.148	1.139	0.906	0.882	0.854	0.777	0.000196826
UPI0000111831	ADP-ribose pyrophosphatase	--	23.667	40.7	6	6	10	1.076	1.086	0.904	0.919	1.032	0.964	0.951	0.520806
UPI000016810B	Methionine--tRNA ligase	--	76.254	56.9	33	33	87	0.972	0.978	1.001	1	0.988	1.031	1.023	0.21736
UPI000012DCB1	Voltage-gated potassium channel	--	46.062	13.2	3	3	6	0.94	0.988	0.952	0.998	1.036	1.022	1.061	0.0325657
UPI00001256B3	D-tagatose-1,6-bisphosphate aldolase subunit KbaZ	--	47.192	18.8	7	7	8	0.953	0.991	0.96	1.002	1.097	1.018	1.073	0.0822776
UPI0000136EA5	Thiamine, thiamine pyrophosphate ABC transporter permease	--	59.532	2.6	1	1	2	0.839	1.128	1.064	1.091	0.98	0.913	0.984	0.925676
UPI000012610C	AsmA family protein	--	68.962	30.3	15	15	28	1.036	1.001	1.054	1.012	0.959	0.926	0.937	0.0948636
UPI0000129289	Gamma-glutamyl-gamma-aminobutyraldehyde dehydrogenase	--	53.418	32.1	11	11	27	1.492	1.598	1.545	0.468	0.494	0.527	0.321	8.80473e-06
UPI0000125CCE	Adenine phosphoribosyltransferase	--	19.859	23	6	6	13	0.991	1.052	0.99	1.013	0.997	0.998	0.992	0.72261
UPI000013A9ED	Chitooligosaccharide deacetylase	--	27.773	10.8	2	2	2	0.997	1.002	1.063	1.035	0.986	0.929	0.963	0.36939
UPI000013B287	Efflux pump membrane transporter	--	111.52	28.4	23	23	62	0.885	0.844	0.896	1.202	1.11	1.06	1.285	0.00368937
UPI000012EF5D	Cystathionine gamma-synthase	--	41.55	23.8	9	9	16	0.975	0.971	0.988	1.029	1.019	0.995	1.037	0.0319615
UPI000013B5B5	2-hydroxyglutaryl-CoA dehydratase, D-component subfamily	--	42.742	14.4	5	5	6
UPI0000112535	Acyl-[acyl-carrier-protein]--UDP-N-acetylglucosamine O-acyltransferase	--	28.08	16	5	5	9	1.082	1.017	0.971	0.973	1.047	0.987	0.979	0.627098
UPI00001681B2	Tryptophan--tRNA ligase	--	37.437	41	12	12	64	0.996	0.991	0.97	1.003	1.027	1.003	1.026	0.0882031
UPI000012B7B5	Glycerol-3-phosphate transporter	--	50.31	17.7	8	8	21	0.958	0.876	0.979	1.096	1.068	1.002	1.125	0.0515964
UPI0000683E74	Phage protein	--	9.0232	10.4	1	1	1	0.814	0.916	0.931	0.93	1.287	1.143	1.263	0.0951603
UPI000003EB7A	Protein MioC	--	15.807	27.9	3	3	4	1.033	1.01	1.043	0.96	0.93	0.968	0.926	0.00769776
UPI000013B0D0	BOF domain-containing protein	--	14.011	40.8	8	8	41	1.024	1.038	0.977	0.958	0.96	1.041	0.974	0.456925
UPI000013B1ED	dTTP/UTP pyrophosphatase	--	21.515	21.3	4	4	9	1.004	1	1.14	0.942	0.99	0.997	0.932	0.2112
UPI0000133659	GTP pyrophosphokinase	--	83.875	42.7	27	27	41	1.004	1	1.006	1.004	0.987	0.982	0.988	0.147728
UPI0000DB2BFF	UPF0441 protein YgiB	--	23.479	35	6	6	19	1.094	1.052	1.02	0.996	0.893	0.925	0.889	0.0356397
UPI0000129845	Dipeptide ABC transporter, periplasmic dipeptide-binding protein DppA	--	60.293	55.7	22	22	110	1.362	1.392	1.356	0.613	0.633	0.628	0.456	3.97129e-07
UPI000005A528	50S ribosomal protein L13	--	16.018	74.6	11	11	56	0.995	1.005	1.027	0.992	0.996	0.994	0.985	0.188839
UPI00001315DD	Peptidase E	--	24.57	24.9	4	4	15	0.985	1.046	0.986	0.977	0.998	1.008	0.989	0.641154
UPI0000111D9B	Pantothenate synthetase	--	31.597	55.5	14	14	39	0.908	0.948	0.88	1.065	1.093	1.099	1.19	0.0017924
UPI0000000AFB	Osmolarity sensor protein EnvZ	--	50.333	16	6	6	7	1.001	0.987	1.038	1.027	0.984	0.937	0.974	0.431834
UPI0000111310	Orotidine 5'-phosphate decarboxylase	--	26.35	53.9	11	11	27	1.067	1.094	0.999	0.94	0.949	0.946	0.897	0.0167053
UPI000013B571	Esterase	--	27.588	20.5	4	4	7	1.019	0.99	1.024	0.977	1.024	1	0.989	0.567725
UPI0000683E61	Cardiolipin synthase C	--	53.665	13.5	5	5	7	0.99	0.901	1.027	0.996	1.069	1.03	1.061	0.244616
UPI0000F0BE89	Ribonuclease D	--	42.197	10.5	4	4	7	1.002	1.015	1.022	0.981	0.984	1.007	0.978	0.0912615
UPI000016824F	Primosomal protein 1	--	19.455	20.1	3	3	4	0.893	0.95	1.08	0.984	1.037	1.065	1.056	0.401117
UPI00005EF4BF	DUF3053 domain-containing protein	--	25.663	40.7	7	7	29	0.955	0.97	1.021	1.044	0.977	1.02	1.032	0.320157
UPI00001311A6	Phenylacetic acid degradation protein PaaY	--	21.324	28.6	5	5	16	1.053	1.094	0.966	0.926	0.956	0.967	0.915	0.0885156
UPI000013A33B	5-oxoprolinase subunit A	--	25.8	23	5	5	7	1.003	0.919	0.956	0.997	1.122	1.09	1.115	0.0680996
UPI0000135A41	Outer membrane lipoprotein	--	15.601	47.7	6	6	43	0.955	0.936	0.919	1.199	1.045	1.01	1.158	0.0547956
UPI0000111D53	3,4-dihydroxy-2-butanone 4-phosphate synthase	--	23.353	54.8	10	10	37	1.034	1.124	1.061	0.94	0.916	0.909	0.859	0.00474197
UPI0000129038	Anaerobic C4-dicarboxylate transporter	--	45.75	7.2	4	4	13	0.931	0.974	0.963	1.103	0.998	0.996	1.08	0.104948
UPI0000129014	Putative lipoprotein	--	19.787	48.6	8	8	46	1.002	0.988	0.982	1.038	0.986	0.982	1.011	0.587335
UPI000013A07F	UPF0294 protein YafD	--	29.991	25.6	6	6	9	0.925	0.921	0.983	1.061	1.046	1.09	1.13	0.00720988
UPI000003EB4F	Putative OLD family ATP-dependent endonuclease	--	63.588	25.7	12	12	20	0.982	1.03	1.027	0.966	0.995	1.004	0.976	0.273308
UPI000003EB2D	Pseudouridine synthase	--	25.865	39.8	6	6	12	1.028	0.944	0.993	0.96	1.075	0.986	1.019	0.689149
UPI0000124F6D	6-phosphogluconate dehydrogenase, decarboxylating	--	51.481	63.2	25	25	99	0.987	0.968	0.991	1.004	1.015	1.029	1.035	0.0285341
UPI0000000053	UTP-glucose-1-phosphate uridylyltransferase	--	32.829	50.2	13	13	59	1.107	1.075	1.082	0.894	0.921	0.902	0.832	0.000126472
UPI000003EACC	50S ribosomal protein L14	--	13.541	50.4	6	6	78	0.996	1.008	1.02	0.904	0.977	1.031	0.963	0.369791
UPI000013B57C	GroES-like protein	--	36.501	21.8	5	5	6	1.01	0.945	1.052	1.013	1.043	1.032	1.027	0.444159
UPI000013AC52	DNA-binding response regulator	--	27.399	43.1	9	9	12	0.991	0.955	0.999	1.026	0.968	1.032	1.028	0.337195
UPI000012BD9B	Putative glucarate transporter	--	49.142	9.8	4	4	6	1.085	1.082	1.102	0.99	0.899	0.825	0.83	0.023492
UPI000003EAEA	YicC family protein	--	33.175	59.9	18	18	45	1.01	1.023	1.056	0.976	0.962	0.969	0.941	0.0120308
UPI000012B80F	Glutamate ABC transporter permease	--	24.914	7.1	2	2	2
UPI0000127E00	Adenosylcobinamide-GDP ribazoletransferase	--	26.385	13	3	3	3	0.947	0.946	0.928	1.129	1.033	1.024	1.129	0.0192969
UPI000013B094	Peptidase family M48 family protein	--	26.842	46	8	8	21	1.001	0.997	1.023	1.087	0.993	0.877	0.979	0.708509
UPI00000010E9	Unassigned protein	--	14.67	12.5	1	1	1
UPI0000047C5E	Adenine deaminase	--	63.739	16.3	9	9	14	1.06	1.082	1.096	0.974	0.966	0.864	0.866	0.021851
UPI000013A373	Transpeptidase	--	33.325	51	10	9	20	1.033	1.024	0.968	0.973	0.976	1.051	0.992	0.805427
UPI0000128FA6	Glutamate decarboxylase	--	52.668	63.5	26	1	443	0.901	0.89	0.833	1.025	1.128	1.132	1.252	0.00526948
UPI000016820D	Tyrosine lyase, involved in thiamine-thiazole moiety synthesis	--	43.32	28.9	7	7	10	1.214	1.199	1.104	0.854	0.834	0.835	0.717	0.000422521
UPI0000000D1F	SH3 domain-containing protein	--	23.076	41.3	11	11	19	0.982	0.986	0.938	1.035	1.059	0.972	1.055	0.153038
UPI0000130A38	Transcription termination/antitermination protein NusA	--	54.87	54.3	24	24	77	1.038	1.046	1.038	0.973	0.956	0.948	0.922	0.000537806
UPI0000031A3E	Protein-export membrane protein SecF	--	35.382	22.6	6	6	19	1.028	1.058	0.986	1.043	0.931	0.942	0.949	0.270226
UPI000013B3F7	Der GTPase-activating protein YihI (Fragment)	--	19.059	45	7	7	22	0.984	1.062	1.037	0.973	1.003	0.966	0.954	0.140364
UPI000013B532	Permease family protein	--	45.711	2.2	1	1	2
UPI000012CFD4	Hydrogenase-2 electron transfer subunit	--	36.003	56.1	16	16	34	0.991	1.002	0.986	1.044	0.992	0.936	0.998	0.922037
UPI000013AB99	Uncharacterized Nudix hydrolase NudL	--	21.435	4.2	1	1	2	1.004	1.01	0.988	0.781	0.882	1.356	1.006	0.895827
UPI000013C144	Translocation and assembly module subunit TamB	--	136.78	25.3	29	29	38	1.042	0.988	1.031	1.03	0.986	0.942	0.966	0.319386
UPI0000047C68	(4S)-4-hydroxy-5-phosphonooxypentane-2,3-dione isomerase	--	11.255	61.5	5	5	23	1.057	1.078	1.078	0.949	0.926	0.91	0.867	0.000492315
UPI000013B0C3	Glycerol-3-phosphate acyltransferase	--	22.193	10.2	2	2	3	0.786	0.888	1.086	1.257	0.999	0.988	1.175	0.251583
UPI000012B8DD	4-aminobutyrate aminotransferase, PLP-dependent	--	44.729	39	14	14	37	1.656	1.558	1.644	0.356	0.343	0.305	0.207	6.19944e-06
UPI0000047C97	Putative GGDEF domain protein	--	33.863	17.9	4	4	4	1.09	1.054	1.163	0.92	0.873	0.916	0.819	0.00399611
UPI00000480BB	Bifunctional adenosylcobalamin biosynthesis protein	--	20.164	9.4	1	1	1	1.065	1.22	1.177	0.845	0.899	0.817	0.74	0.00367833
UPI00001361CA	Cysteine desulfuration protein SufE	--	15.8	46.4	6	6	10	0.941	1.013	0.976	0.934	1.047	1.063	1.039	0.466948
UPI0000168087	Nitrate reductase, alpha subunit	--	140.49	47.7	50	40	179	0.961	0.934	0.958	1.07	1.057	1.026	1.105	0.00290478
UPI000013A0BC	Cyclic di-GMP phosphodiesterase YahA	--	40.724	12.7	4	4	6	1.052	0.989	0.959	0.947	1.096	1.039	1.027	0.635861
UPI000013ABC5	YebG protein	--	10.717	16.7	2	2	3	0.907	1.122	1.08	0.988	1.08	0.842	0.936	0.53042
UPI0000135816	L-seryl-tRNA(Sec) selenium transferase	--	50.607	46.7	19	19	29	1.022	0.984	0.991	0.99	0.979	1.026	0.999	0.970004
UPI000012B0A6	Aldose 1-epimerase	--	38.19	59.5	15	15	64	0.98	0.969	0.962	1.04	1.02	1.04	1.065	0.0017213
UPI0000125136	Indole-3-acetyl-aspartic acid hydrolase (IAA-Asphydrolase)	--	46.588	2.3	1	1	2	1.098	1.15	1.156	0.86	0.865	0.891	0.769	0.000181431
UPI000013B056	Conserved protein	--	28.562	14.9	5	5	9	1.053	1.001	0.995	0.952	0.981	1.04	0.975	0.462995
UPI000012FD87	Nitrate reductase molybdenum cofactor assembly chaperone NarJ	--	26.449	25.4	5	5	6	1.027	0.926	0.966	0.974	1.175	0.858	1.03	0.828714
UPI000012833F	Transcriptional regulatory protein CpxR	--	26.312	47.8	11	11	28	0.957	1.059	0.992	0.999	1.008	1.028	1.009	0.76766
UPI00001B5154	Lytic murein transglycosylase, soluble	--	73.352	51.8	28	28	55	1.068	1.112	1.061	0.909	0.938	0.97	0.869	0.00414559
UPI0000137030	Metalloprotease TldD	--	51.363	32.2	11	11	31	0.996	1.065	1.074	0.926	0.989	0.986	0.925	0.073182
UPI0000112340	Aconitate hydratase B	--	93.497	67.9	52	52	259	1.037	1.021	1.044	0.961	0.976	0.96	0.934	0.00129211
UPI000005A698	50S ribosomal protein L34	--	5.3803	17.4	1	1	4	1.295	1.009	0.993	0.93	1.137	0.647	0.823	0.315397
UPI000012AD7B	Ferric uptake regulation protein	--	16.795	76.4	9	9	34	1.048	1.081	1.071	0.918	0.95	0.954	0.882	0.00118124
UPI000013A0F5	Putative lipoprotein	--	20.95	28.6	5	5	13	1.002	0.986	1.01	1.168	0.958	0.904	1.011	0.956346
UPI000013B58B	Inner membrane protein yjgQ	--	39.618	23.1	6	6	7	1	0.988	1.047	1.044	0.984	0.928	0.974	0.516746
UPI000013B0D7	Putative tRNA binding protein	--	12.315	34.5	3	3	8	1.131	1.088	1.112	0.934	0.876	0.928	0.822	0.00107991
UPI000012AC8F	Ferritin	--	18.894	5.4	2	2	2	1.134	1.1	0.928	1.057	0.862	0.926	0.9	0.289217
UPI000013A6C4	Lipopolysaccharide assembly protein B	--	44.531	11.8	4	4	5	0.951	0.945	1.022	1.039	0.949	1.024	1.032	0.449487
UPI000011F516	Phosphate regulon transcriptional regulatory protein PhoB	--	26.433	39.7	7	7	11	0.976	1	0.965	1.046	1.02	1.014	1.047	0.0311682
UPI00001639FD	tRNA-modifying protein YgfZ	--	36.094	47.9	14	14	55	0.94	0.968	0.966	1.042	1.043	1.026	1.082	0.00186667
UPI000013A90E	Dicarboxylate transport family protein	--	96.834	8.5	7	7	7	1.062	1.022	0.938	1.002	0.991	1.003	0.991	0.852457
UPI0000125D6F	Arabinose import ATP-binding protein AraG	--	55.018	16.7	7	6	8	0.984	1.02	1.113	0.908	0.988	0.95	0.913	0.10948
UPI000012FD72	Ferredoxin-type protein NapH	--	31.873	11.1	3	3	3	0.962	0.956	1.001	1.116	0.964	1.009	1.058	0.294673
UPI0000128F85	dCTP deaminase	--	21.249	29	6	6	12	1.058	1.027	0.967	1.003	1.025	0.961	0.979	0.562492
UPI000013B032	tRNA pseudouridine synthase D	--	39.091	50.1	16	16	32	0.914	0.934	0.978	1.064	1.044	1.076	1.127	0.00538939
UPI0000139FF8	Non-specific ribonucleoside hydrolase RihC	--	32.56	14.5	2	2	10	0.992	0.915	0.998	1.016	1.079	1.041	1.08	0.0799882
UPI000012FC59	Quinolinate synthase A	--	38.24	16.1	5	5	5	1.094	1.031	1.068	0.943	0.872	1.006	0.883	0.0489092
UPI000003419F	4-diphosphocytidyl-2-C-methyl-D-erythritol kinase	--	30.925	33.9	7	7	9	0.992	1.019	1	0.934	0.996	1.036	0.985	0.637474
UPI0000129501	Anaerobic dimethyl sulfoxide reductase chain A	--	90.398	41.2	34	32	79	0.93	0.919	0.911	1.073	1.084	1.095	1.178	4.00314e-05
UPI0000125A4B	Alpha-amylase	--	75.712	2.5	2	2	4	1.037	0.983	1.007	0.978	0.932	1.076	0.986	0.752415
UPI0000131CAF	Protein PmbA	--	48.369	42.9	18	18	46	1.021	1.013	1.036	0.956	0.964	0.984	0.946	0.00676548
UPI000013A92D	Predicted spermidine/putrescine transporter subunit	--	37.04	25.2	7	7	10	1.295	1.295	1.279	0.737	0.735	0.716	0.566	5.91155e-07
UPI000016539B	Dihydrolipoyl dehydrogenase	--	50.688	62.2	26	26	187	0.952	0.942	0.946	1.068	1.062	1.058	1.123	9.50074e-06
UPI00001103DE	PTS IIA-like nitrogen-regulatory protein PtsN	--	17.959	33.1	5	5	12	1.031	1.07	1.022	0.954	0.982	0.982	0.934	0.0164725
UPI000013A0B6	Inner membrane protein yagU	--	22.967	30.4	5	5	13	0.667	0.636	0.651	1.407	1.343	1.35	2.098	3.25797e-06
UPI000012CFCC	Protein involved in processing of HyaA and HyaB proteins	--	14.89	15.9	2	2	4	1.053	0.759	0.829	1.144	1.026	1.185	1.27	0.0819825
UPI0000110FA1	Serine hydroxymethyltransferase	--	45.316	47.2	18	18	105	0.983	0.989	1	0.982	1.006	0.986	1.001	0.946515
UPI00001639AC	Ribosome-binding ATPase YchF	--	39.667	49	15	15	59	0.982	1.024	1.015	1.01	0.974	1.006	0.99	0.581324
UPI000012C689	Modulator of FtsH protease HflC	--	37.649	28.1	9	9	24	1.025	0.996	1.001	1.05	0.979	0.895	0.968	0.498199
UPI000003EB17	Thymidylate synthase	--	30.479	41.3	10	10	28	0.986	1.052	1.037	0.967	0.982	1.03	0.969	0.310672
UPI000013AE03	Glutathione S-transferase, N-terminal domain protein	--	24.325	42.1	10	10	14	1.119	1.141	1.053	0.853	0.889	0.92	0.804	0.00256794
UPI000012D65D	PfkB family carbohydrate kinase	--	48.448	34.6	12	12	21	1.021	1.034	1.036	0.98	0.934	0.978	0.936	0.0150473
UPI000012BABF	Transcription elongation factor GreB	--	18.527	32.3	7	7	13	1.004	0.985	0.952	1.002	1.019	1.051	1.045	0.105319
UPI00001277C4	Protein phosphatase CheZ	--	23.976	24.3	3	3	7	1.402	1.37	1.368	0.669	0.504	0.635	0.437	0.000667596
UPI0000128BEA	Cysteine/glutathione ABC transporter ATP-binding protein/permease CydC	--	62.919	17.8	7	7	11	0.922	0.965	1.055	1.091	0.907	0.916	0.99	0.879046
UPI000012EEF1	2-succinyl-5-enolpyruvyl-6-hydroxy-3-cyclohexene-1-carboxylate synthase	--	61.366	20.1	11	11	14	1.011	1.025	0.975	0.964	1.048	0.971	0.991	0.763895
UPI000013A2D2	Putative permease	--	89.331	10.1	5	5	7	1.031	1.136	1.008	0.921	0.922	1.006	0.897	0.0830136
UPI000013347F	Transcriptional regulatory protein RcsB	--	23.67	37	9	9	18	1.047	1.05	1.06	0.976	0.939	1.003	0.924	0.0153785
UPI000012A7E6	Protein FixB	--	33.513	18.2	4	4	5	1.053	1.14	1.022	0.899	0.952	0.953	0.872	0.0229007
UPI0000129EF2	GTPase Der	--	55.035	31.8	16	16	37	1.017	1.038	0.994	0.998	1.014	0.951	0.972	0.278143
UPI00001309CF	NADH-quinone oxidoreductase subunit A	--	16.457	17.7	2	2	11	1.017	0.971	0.952	1.157	0.975	0.895	1.03	0.775592
UPI0000132E74	Sensory histidine kinase in two-component regulatory system with QseB	--	50.281	8.7	3	3	3	1.01	1.062	1.235	1.03	0.9	0.778	0.819	0.115443
UPI000013A08B	Methyltransf_11 domain-containing protein	--	27.244	7.9	3	3	3	1.062	0.912	1.032	0.985	1.113	0.908	1	0.986394
UPI00015C4E8A	Acyl-CoA thioesterase I	--	23.491	44	7	7	10	0.997	1.05	1.055	0.899	0.938	1.074	0.938	0.307522
UPI000012AB35	Formate transporter FocA	--	30.99	8.4	2	2	5	0.901	0.907	0.928	1.077	1.052	0.932	1.119	0.0731345
UPI000013B02B	Paral putative tRNA synthase	--	41.339	13.4	4	4	8	0.89	0.925	0.884	1.108	1.153	1.15	1.264	0.000254095
UPI000015C564	Lysine-specific permease	--	53.575	6.7	3	3	5	1.064	1.051	1.082	0.975	0.908	0.916	0.876	0.00508747
UPI0001FB6C3B	Pantothenate kinase	--	36.604	37.1	11	11	22	0.928	0.984	1.018	1.025	0.97	1.092	1.054	0.301057
UPI0000168204	Ferredoxin-NADP reductase	--	27.751	23.8	5	5	11	1.078	1.053	0.896	0.967	1.06	1.037	1.012	0.830563
UPI000012FA85	Putative oxidoreductase with NAD(P)-binding Rossmann-fold domain	--	33.681	23.1	6	6	7	0.95	0.911	1.066	1.048	1.012	1.003	1.046	0.386193
UPI0000683E8F	2-hydroxy-3-oxopropionate reductase	--	30.659	68.9	16	16	78	0.915	0.921	0.927	1.086	1.084	1.082	1.177	1.97907e-06
UPI000013A6DB	Amino acid transporters	--	50.852	4.8	2	2	2	1.498	1.372	1.24	0.71	0.582	0.617	0.464	0.00067257
UPI0000130D20	OmpX	--	18.602	43.3	7	7	26	0.917	0.899	0.988	1.152	1.062	0.943	1.126	0.147993
UPI0000136B43	DNA-binding transcriptional activator	--	34.538	8.3	3	3	5
UPI000013B417	Protein of uncharacterized function (DUF1454)	--	21.763	38.7	7	7	14	0.982	1.028	0.968	0.994	0.969	1.035	1.007	0.813385
UPI000013A0F7	Putative lipoprotein	--	19.56	11.7	2	2	4	0.966	1.003	0.957	1.129	1.017	0.962	1.062	0.30025
UPI0000128DF6	D-amino acid dehydrogenase	--	47.607	62.7	22	22	87	1.023	1.043	1.061	0.938	0.97	0.966	0.919	0.00481591
UPI0000134292	Pseudouridine synthase	--	37.121	53.4	14	14	26	1.071	0.987	1.083	1.04	0.979	0.968	0.951	0.246123
UPI000013AEAA	tRNA1(Val) (adenine(37)-N6)-methyltransferase	--	27.27	6.5	1	1	2	1.062	0.985	1.047	1.036	0.927	0.952	0.942	0.213169
UPI0001B88F7E	Formate dehydrogenase-N subunit alpha	--	89.845	56.5	35	32	110	1	0.974	0.992	1.067	1.017	0.96	1.026	0.470731
UPI0000132A25	Phosphoribosylamine--glycine ligase	--	45.94	21.9	9	9	12	0.944	1.008	0.987	1.002	1.034	0.995	1.031	0.242482
UPI000003EB56	Transcriptional regulatory protein	--	27.488	24.7	3	3	3	1.037	0.882	0.969	0.958	1.075	0.986	1.045	0.480314
UPI00000017FA	RNA polymerase sigma factor RpoS	--	37.971	41.2	12	12	24	1.208	1.185	1.184	0.738	0.92	0.802	0.688	0.00423612
UPI000013B547	4Fe-4S mono-cluster protein YjdI	--	8.5498	14.5	1	1	4	1.053	1.108	1.018	0.956	0.918	0.923	0.88	0.0100006
UPI0000132958	PTS system, mannitol-specific IIC component	--	67.971	18.5	8	8	23	0.964	0.915	1.046	1.055	1.033	1.019	1.062	0.199355
UPI0000000D24	UPF0056 membrane protein	--	23.617	3.6	1	1	1
UPI000012EBA1	Phenylacetic acid degradation protein PaaZ	--	73.002	30.2	16	16	22	1.441	1.367	1.377	0.588	0.607	0.58	0.424	2.27316e-06
UPI000003EB23	UDP-N-acetyl-D-mannosaminuronic acid transferase	--	27.928	28.9	7	7	9	1.073	0.95	1.027	0.925	1.037	0.956	0.957	0.420356
UPI0000037A2D	Alcohol dehydrogenase	--	42.097	34.9	10	10	37	0.877	0.832	0.78	1.19	1.2	1.096	1.401	0.00163463
UPI000012E75A	L-lactate permease	--	59.167	8.2	3	3	6	1.082	0.961	0.94	1.02	0.956	1.044	1.012	0.803374
UPI000013A0C5	Putative metallo-dependent hydrolase domain deaminase	--	50.548	10.2	3	3	3	0.933	0.94	0.899	1.039	1.093	1.086	1.161	0.00210204
UPI000013A2CA	tRNA 2-selenouridine synthase	--	41.11	19.2	6	6	8	0.976	0.938	1.023	0.938	1.052	1.046	1.034	0.51088
UPI0000132864	Phosphoenolpyruvate--protein phosphotransferase	--	91.773	11	9	8	13	1.048	1.032	1.05	0.946	0.964	0.992	0.927	0.00696145
UPI0000137AF6	Glycerophosphoryl diester phosphodiesterase	--	27.409	30.4	8	8	14	1.102	1.046	1.016	0.976	0.912	0.926	0.889	0.0203519
UPI000003ACCA	DNA-binding protein HU-alpha	--	9.5349	71.1	6	5	75	1	1.048	1.005	0.952	0.967	1.01	0.959	0.146545
UPI000013ABCB	Paraquat-inducible protein A	--	48.273	4.7	2	2	2
UPI000012F22F	Membrane-bound lytic murein transglycosylase A	--	40.41	13.2	4	4	7	0.953	0.993	1.08	1.02	0.93	0.925	0.95	0.354545
UPI0000132FA0	50S ribosomal protein L31 type B	--	9.9201	27.6	2	2	2	0.893	0.894	0.698	1.071	1.215	1.238	1.418	0.0197309
UPI00001315FE	Peptidase T	--	44.923	46.8	16	16	53	1.032	1.004	1.005	0.956	0.98	0.978	0.958	0.0237987
UPI0000165553	Lysine--tRNA ligase	--	57.826	50.7	29	18	141	0.764	0.768	0.758	1.24	1.25	1.221	1.621	4.23386e-07
UPI0000168044	Glutamine--tRNA ligase	--	63.477	50.5	26	26	81	1.013	0.975	0.978	0.986	1.023	1.009	1.018	0.34568
UPI000002EA96	Maltose O-acetyltransferase	--	20.096	26.8	3	3	5	0.816	0.986	0.931	0.966	1.088	1.117	1.16	0.104802
UPI0000047CAD	Type 1 fimbria chaperone FimC	--	26.689	30.3	6	6	15	0.911	1.05	0.913	0.99	1.017	1.065	1.069	0.255462
UPI000012AD59	L-fucose mutarotase	--	15.473	42.9	4	4	11	0.911	0.93	0.948	1.064	1.126	1.104	1.181	0.00118534
UPI0000059CB5	UPF0033 domain-containing protein	--	8.6389	29.9	1	1	2	0.932	0.974	1.063	0.934	0.992	1.12	1.026	0.731833
UPI000012984F	Dipeptide transporter	--	37.56	24.6	7	7	10	1.278	1.235	1.294	0.712	0.76	0.732	0.579	2.02153e-05
UPI0000032EA8	Thymidylate kinase	--	23.783	57.7	11	11	24	1.072	0.987	0.958	0.964	1.015	1.04	1.001	0.975791
UPI0000130178	Nickel ABC transporter, periplasmic nickel-binding protein	--	58.718	33	14	14	30	1.072	1.089	1.061	0.923	0.937	0.946	0.871	0.00018693
UPI00001315C4	Peptidase B	--	46.18	51.3	19	19	66	0.961	0.938	0.97	1.062	1.017	1.076	1.1	0.008646
UPI000018F69F	Transcriptional activator protein NhaR	--	34.066	20.4	5	5	6	0.98	0.906	0.998	1.06	1.064	1.026	1.092	0.0491086
UPI00001B511F	Putative transcriptional regulator	--	26.887	3.4	1	1	2	1.178	1.152	0.948	0.878	0.903	0.957	0.835	0.0748054
UPI0000129440	Co-chaperone protein DjlA	--	30.579	29.9	7	7	11	1.059	1.03	1.016	1.001	0.981	0.92	0.935	0.07322
UPI000013ADE4	Aminotransferase, classes I and II	--	45.517	36	13	13	24	0.932	0.911	0.923	1.085	1.107	1.067	1.178	0.000196427
UPI00001654AC	Ribonucleotide reductase	--	43.517	48.1	16	16	47	0.993	0.957	0.962	1.027	1.024	1.046	1.064	0.00979848
UPI0000168124	Chorismate synthase	--	39.137	26.9	9	9	16	1.008	1.061	1.008	0.989	0.987	0.955	0.953	0.0774102
UPI0000128D2A	Sulfate/thiosulfate ABC transporter, periplasmic sulfate/thiosulfate-binding protein	--	37.614	25.4	8	8	11	0.685	0.71	0.664	1.265	1.357	1.309	1.909	2.09018e-05
UPI00001286DC	DNA-binding transcriptional activator of copper-responsive regulon genes	--	15.235	12.6	2	2	5	1.07	0.933	1.226	1.035	0.9	0.914	0.882	0.25182
UPI000013B0AC	General secretion pathway protein L	--	32.058	3.1	1	1	1	0.884	1.003	0.996	0.969	1.008	1.157	1.087	0.290762
UPI000013B42A	Transcriptional regulator	--	32.149	16.6	4	4	4	0.996	1.066	1.068	1.004	0.979	0.89	0.918	0.116413
UPI000013AC50	Putative lipoprotein	--	16.594	5.2	1	1	1
UPI00001112E0	Glutaredoxin, GrxA family	--	9.6847	37.6	4	4	6	0.966	0.992	1.004	0.996	0.991	1.024	1.017	0.342867
UPI00001654FE	30S ribosomal protein S9	--	14.856	53.1	8	8	44	0.944	0.996	1.009	1.065	1.002	0.991	1.037	0.297879
UPI0000111973	Glutamine synthetase	--	12.259	25	2	2	2	0.929	0.888	1.021	1.035	0.99	1.146	1.117	0.137257
UPI000012A8CE	Flavodoxin	--	19.7	28.9	3	3	10	1.012	0.996	0.924	1.032	1.015	1.029	1.049	0.16281
UPI0000132324	Proline/betaine transporter	--	54.845	15.8	8	8	23	1.145	1.126	1.084	0.918	0.858	0.882	0.792	0.000789322
UPI000012C68E	Protein HflK	--	45.544	49.9	20	20	78	1.04	1.01	1.027	0.948	0.979	0.961	0.939	0.00732722
UPI000187BF3E	Aspartate/ornithine carbamoyltransferase family protein	--	44.056	57.7	20	20	47	0.988	1.065	1.031	0.953	0.973	0.965	0.937	0.0465777
UPI000016538F	Transaldolase	--	35.219	71.6	21	20	128	0.954	0.937	0.97	1.03	1.062	1.049	1.098	0.00221254
UPI000013B6EF	Putative ferredoxin	--	11.798	16.5	2	2	3	0.822	0.987	1.062	1.026	1.065	1.054	1.095	0.277317
UPI000013A9BA	YdhR domain containing protein	--	11.288	53.5	5	5	19	0.941	0.927	0.937	1.096	1.05	1.065	1.145	0.000541775
UPI0000131990	3-dmu-9_3-mt domain-containing protein	--	16.171	54.4	6	6	18	1.126	1.153	1.041	0.905	0.866	0.904	0.806	0.00322505
UPI00003B2600	DNA topoisomerase	--	19.871	31.7	5	5	6	0.815	1.001	0.794	1.101	1.066	1.232	1.302	0.0350236
UPI00001311A3	Beta-ketoadipyl-CoA thiolase	--	42.276	26.7	7	7	7	1.104	1.074	1.412	0.758	0.844	0.834	0.679	0.0150799
UPI000013BF9B	DnaA initiator-associating protein DiaA	--	21.106	32.7	4	4	8	1.14	1.011	0.991	0.925	0.853	1.013	0.888	0.146551
UPI0000132919	Peptidyl-tRNA hydrolase	--	21.082	52.1	8	8	17	0.978	0.973	0.983	1.018	1.04	1.006	1.044	0.0130827
UPI000016EFE8	Isochorismatase family protein	--	20.452	27.1	4	4	9	1.03	1.058	0.871	1.009	0.992	1.045	1.029	0.633156
UPI0000135823	Selenocysteine-specific translation elongation factor	--	68.867	34	18	18	34	0.991	0.965	1.004	1.024	1.025	0.999	1.03	0.110584
UPI00001308F5	ADP-ribose diphosphatase	--	21.153	62.4	8	8	17	1.032	1.073	1.05	0.996	0.922	1.003	0.926	0.0566183
UPI0000138FAE	Polysaccharide biosynthesis/export protein	--	41.909	2.1	1	1	1	0.904	0.873	0.797	1.243	1.122	1.063	1.332	0.00851788
UPI000013B1C7	N-acetyltransferase	--	18.534	41.9	5	5	12	1.001	1.029	1.047	0.98	0.957	0.968	0.944	0.0177502
UPI000013A924	Predicted lipoprotein	--	24.427	45.5	9	9	21	1.189	1.128	1.248	0.928	0.781	0.755	0.691	0.00606168
UPI000011EE57	Sodium/glutamate symporter	--	42.425	8.5	2	2	4	0.96	1.052	1.114	0.963	0.899	1.089	0.944	0.452533
UPI000013A31B	Esterase ybfF	--	28.437	46.1	10	10	15	1.002	0.996	1.032	0.932	0.994	0.984	0.96	0.149035
UPI0000129E3E	Protein ElaB	--	11.306	49.5	7	7	21	0.959	0.967	0.915	1.028	1.042	1.025	1.089	0.00872051
UPI0000112150	Fumarate reductase subunit D	--	13.107	19.3	3	3	18	0.918	0.933	0.901	1.099	1.097	1.034	1.174	0.00204597
UPI00001290F7	Cell division protein DedD	--	22.938	45	8	8	16	1.018	0.968	0.982	0.946	1.027	1.046	1.017	0.65943
UPI00001639BA	Cell division activator CedA	--	9.3767	28.8	2	2	2	1.044	1.158	1.039	0.864	0.949	0.966	0.857	0.0360242
UPI0000136B52	L-threonine 3-dehydrogenase	--	37.239	47.5	12	12	74	1.001	0.976	0.974	1.032	1.019	1.034	1.045	0.010952
UPI000012A974	RNA polymerase sigma factor FliA	--	27.521	10.9	2	2	3
UPI00000520C0	DNA-binding transcriptional dual regulator	--	37.999	46.4	11	11	33	1.046	0.99	0.994	1.005	0.964	1.021	0.987	0.618862
UPI000003EB39	Succinylornithine transaminase	--	43.665	69.7	21	21	86	1.37	1.351	1.325	0.655	0.649	0.649	0.483	2.26832e-07
UPI000013A9D7	Predicted inner membrane protein	--	39.841	5.9	2	2	3	1.055	1.013	0.977	0.97	0.907	1.068	0.967	0.538651
UPI000012C3BD	HTH-type transcriptional regulator HdfR	--	31.746	28.3	7	7	9	0.936	1.068	1.012	0.969	1.021	1.037	1.004	0.919361
UPI000013710A	Tol-Pal system protein TolB	--	45.955	53.3	18	18	66	0.99	1.016	0.987	0.993	1.016	1.034	1.017	0.329488
UPI00001304EC	Cytochrome c-552	--	53.702	38.7	16	16	36	0.865	0.897	0.9	1.076	1.125	1.115	1.246	0.000294939
UPI000013B0A0	UPF0235 protein YggU	--	10.456	18.8	1	1	2	1.002	1.064	1.004	1.058	0.966	0.918	0.958	0.393133
UPI000013A358	YbhL protein	--	25.902	7.3	2	2	4	1.009	1.028	0.976	1.038	0.992	0.951	0.989	0.725991
UPI000013AEAF	RNA methyltransferase, TrmH family	--	37.784	46.1	16	16	41	0.994	0.984	0.999	0.989	0.994	1.038	1.015	0.416839
UPI000013AEC2	UPF0125 protein I3Y_17600	--	10.789	55.2	6	6	10	0.945	0.971	0.917	1.096	1.034	1.055	1.124	0.00788586
UPI000000E96A	GMP reductase	--	37.383	40.3	10	10	34	1.034	0.977	1.001	0.973	0.981	1.017	0.986	0.557573
UPI000013A0F0	Conserved protein	--	13.364	30.4	3	3	6	1.169	1.168	1.141	0.832	0.824	0.876	0.728	0.00010285
UPI000013A9E4	Endoribonuclease GhoS	--	10.865	30.2	2	2	5	1.1	1.127	1.105	0.855	0.872	0.961	0.807	0.00424045
UPI00001639B4	Phage shock protein A	--	25.493	50.5	13	13	32	1.009	0.984	0.991	0.988	1.034	1	1.013	0.465055
UPI000012ADF4	UPF0716 protein FxsA	--	17.692	32.9	4	4	9	1.005	1.021	0.986	1.065	0.972	0.962	0.996	0.883649
UPI000013B29A	Cellulose biosynthesis protein BcsQ	--	27.14	23.6	5	5	7	1.102	1.126	1.087	0.875	0.944	0.884	0.815	0.00138966
UPI000013AE93	Iron-binding protein IscA	--	11.556	44.9	5	5	8	0.985	1.026	0.987	0.996	0.988	1.007	0.998	0.886192
UPI000003EB34	TraB family protein	--	29.902	11.7	2	2	2			1.429	0.853	1.003	0.73	0.603
UPI000003EB64	Multifunctional fusion protein	--	46.973	37	13	13	34	0.98	0.983	1.007	1.027	0.986	1.025	1.023	0.227123
UPI0000047CB7	Diguanylate cyclase AdrA	--	41.537	2.2	1	1	1	1.208	1.177	1.225	0.806	0.779	0.826	0.668	4.01892e-05
UPI000011179D	L-fucose isomerase	--	64.976	33.3	15	15	27	1.004	0.974	1.017	1.03	1.011	1.032	1.026	0.146997
UPI000013AE9D	tRNA (cytidine/uridine-2'-O-)-methyltransferase TrmJ	--	27.048	35	7	7	19	0.984	0.992	0.994	0.996	1.043	1.019	1.03	0.100823
UPI0000000B51	RNA polymerase-binding transcription factor DksA	--	17.528	60.9	7	7	27	1.084	1.042	0.98	0.937	0.954	0.963	0.919	0.0510934
UPI0000000E9E	NAD kinase	--	32.566	25.7	6	6	10	0.995	1.035	1.058	0.975	0.92	1.031	0.948	0.218478
UPI000003EB01	Stringent starvation protein A	--	24.305	58	8	8	47	0.963	0.993	0.98	1.001	1.01	1.05	1.043	0.0725072
UPI000011134B	Ribosome-recycling factor	--	20.638	58.9	14	14	55	1.016	1.03	0.965	0.978	1.003	0.994	0.988	0.610258
UPI00000480BE	Galactokinase	--	41.442	32.7	12	12	44	0.927	0.922	0.95	1.073	1.078	1.041	1.14	0.000781092
UPI0000050EFF	50S ribosomal protein L27	--	9.1244	48.2	6	6	26	0.967	0.999	1.027	1.068	0.994	0.984	1.018	0.610044
UPI00001B5148	Oligoribonuclease	--	20.815	54.7	10	10	23	0.968	0.97	0.959	1.026	1.047	1.016	1.066	0.00253414
UPI000013AC6B	Elongation factor P-like protein	--	21.532	38.9	8	8	21	0.997	1.025	1.07	0.957	0.959	1.003	0.944	0.0887361
UPI0000163969	Uridylate kinase	--	25.97	23.7	4	4	31	1.026	0.996	1.002	0.974	0.996	0.962	0.97	0.0856299
UPI00001277BA	Chemotaxis adaptor protein CheW	--	18.084	11.4	2	2	4	1.542	1.517	1.668	0.402	0.352	0.361	0.236	8.63762e-06
UPI00001253B0	Acetyl-coenzyme A synthetase	--	72.093	47.1	30	30	109	1.343	1.338	1.368	0.673	0.659	0.648	0.489	6.36438e-07
UPI000011F517	Phosphate regulon sensor kinase PhoR	--	49.629	5.8	2	2	2	1.102	1.046	1.127	0.86	0.967	0.918	0.838	0.0119027
UPI000003EAD9	Fimbrial chaperone protein	--	19.06	19.4	3	3	3	0.931	0.966	0.923	0.999	1.104	1.046	1.117	0.026783
UPI0000112E64	UDP-glucose 4-epimerase	--	37.265	58.3	15	15	47	0.972	1.004	0.972	0.998	1.037	1.044	1.044	0.0703745
UPI00000350B7	Dual-specificity RNA methyltransferase RlmN	--	43.085	22.9	9	9	12	1.081	1.073	1.086	0.929	0.847	0.951	0.842	0.00812498
UPI000013A334	Dinuclear metal center protein, YbgI family	--	26.892	42.9	7	7	24	1.014	0.963	0.991	1.024	1.035	1.039	1.044	0.0503192
UPI000013A69A	K(+)/H(+) antiporter NhaP2	--	62.285	6.1	4	4	5	1.024	1.127	0.978	0.975	0.972	0.94	0.923	0.143176
UPI0000135AC9	Protein Smp	--	24.082	11.2	2	2	2	0.982	0.962	1.046	1	0.964	1.057	1.01	0.794478
UPI000012ACCC	ATP-dependent zinc metalloprotease FtsH	--	70.707	58.4	34	34	131	1.036	1.024	1.027	1.013	0.97	0.954	0.951	0.0513793
UPI000013A6D3	Cupin domain-containing protein	--	20.091	39.5	6	6	16	1.336	1.312	1.336	0.679	0.632	0.708	0.507	3.54691e-05
UPI000012A9FA	Cystine ABC transporter, cystine-binding periplasmic protein	--	29.039	56.8	17	17	52	1.151	1.151	1.104	0.831	0.866	0.888	0.759	0.000316745
UPI0000129552	Replicative DNA helicase	--	52.389	43.1	16	16	26	0.984	1.015	1.013	0.987	0.988	0.951	0.971	0.145185
UPI00003B260F	Carboxymethylenebutenolidase	--	29.425	21.4	4	4	6	1.155	1.19	1.108	0.954	0.879	0.87	0.783	0.00236478
UPI0000168000	Quinolinate phosphoribosyltransferase	--	32.762	52.5	14	14	27	1.062	1.103	0.999	0.931	0.978	0.992	0.917	0.0675079
UPI00001653E2	Pyruvate formate-lyase-activating enzyme	--	28.204	61	13	13	62	0.931	0.976	0.964	1.04	1.003	1.047	1.076	0.0193587
UPI000013BDAF	DNA-binding response regulator	--	28.721	35.2	8	8	12	0.96	0.96	0.908	1.096	1.07	1.017	1.126	0.0148832
UPI0000131505	Erythronate-4-phosphate dehydrogenase	--	41.367	58.7	20	20	44	0.984	0.991	0.986	1.003	1.005	1.023	1.024	0.0243586
UPI000003EAF1	ATP synthase epsilon chain	--	15.068	38.8	4	4	18	1.086	1.077	1.027	0.924	0.939	1.015	0.902	0.0376791
UPI0000001B60	3-deoxy-D-manno-octulosonic acid transferase	--	47.29	32.2	11	11	15	1.025	0.974	0.942	0.97	1.06	1.034	1.042	0.320409
UPI000013577D	Protein-export protein SecB	--	17.277	29	4	4	24	1.005	1.09	0.99	0.978	1.004	1.014	0.971	0.4206
UPI000012F8EE	Chromosome partition protein MukB	--	170.23	38.9	53	53	121	1.022	1.018	1.028	0.97	0.975	0.972	0.951	9.55303e-05
UPI000013B9C3	YmgB domain containing protein	--	9.6939	15.9	2	2	5	1.239	1.301	1.157	0.751	0.755	0.774	0.617	0.000165633
UPI000013A6C7	Sua5/YciO/YrdC/YwlC family protein	--	23.211	60.2	10	10	24	1.014	1.052	0.988	0.942	1.014	0.969	0.958	0.198784
UPI0000000ED3	10 kDa chaperonin	--	10.387	59.8	6	6	47	0.909	0.913	0.923	1.067	1.068	1.121	1.186	0.000546449
UPI000003EB67	UDP-N-acetylmuramate--L-alanine ligase	--	53.625	31.2	14	14	27	0.972	0.961	0.922	1.048	1.038	1.009	1.084	0.0147452
UPI0000137A3D	KR domain protein	--	27.85	51.3	12	12	48	1.066	1.038	1.04	0.936	0.94	0.988	0.911	0.00845588
UPI000013298D	Galactosamine-specific PTS system enzyme IIB component	--	17.622	13.9	2	2	2
UPI0000125E4A	N-acetyl-gamma-glutamyl-phosphate reductase	--	35.952	6.9	2	2	2	0.921	1.06	1.067	1.022	0.936	1.007	0.973	0.660982
UPI0000132805	Thiosulfate sulfurtransferase PspE	--	11.475	54.8	5	5	24	0.978	0.979	0.919	0.975	1.04	1.056	1.068	0.111748
UPI000012F116	Probable septum site-determining protein MinC	--	24.775	48.9	10	10	16	1.03	1.003	1.045	0.92	0.998	0.994	0.946	0.126478
UPI000013B6E9	Uncharacterized HTH-type transcriptional regulator ykgD	--	31.474	14.1	3	3	3	1.153	0.901	0.985	0.987	1.057	0.926	0.977	0.825716
UPI0000134589	Predicted ribosome-associated, sigma 54 modulation protein	--	10.75	34.7	3	3	16	1.094	1.004	0.941	0.87	1.038	1.056	0.975	0.741037
UPI00001488E6	Acyl-CoA thioesterase II	--	31.966	35	9	9	13	1.029	0.98	1.064	0.948	1.024	0.984	0.962	0.300999
UPI0000110D23	Cytidylate kinase	--	24.746	35.7	7	7	20	1.055	1.086	0.994	0.936	0.974	0.978	0.921	0.0509457
UPI0000135E7F	NlpC/P60 family protein	--	21.04	11.2	1	1	1
UPI000013AE00	Predicted NUDIX hydrolase	--	20.376	12.2	2	2	9	0.979	1.011	1.016	0.989	0.954	1.064	1	0.987504
UPI00001654B9	Cysteine synthase	--	34.489	50.8	12	12	62	0.918	0.887	0.886	1.086	1.126	1.144	1.247	0.0003337
UPI000013B1E1	Predicted barnase inhibitor	--	10.796	11.1	1	1	2	0.96	1.002	0.932	1.007	1.047	1.065	1.078	0.0486462
UPI0000047C7C	Ion-translocating oxidoreductase complex subunit B	--	20.544	25.5	3	3	3	1.01	1.01	1.078	0.979	0.94	0.996	0.941	0.0933451
UPI00001315F2	Xaa-Pro dipeptidase	--	50.176	44.7	16	16	60	1.007	1.011	1.044	0.99	1.011	0.968	0.97	0.143045
UPI000013B1CD	RNA-binding protein YhbY	--	10.784	30.9	3	3	5	0.921	1.009	0.995	1.013	1.061	1.002	1.052	0.202293
UPI000013A2F2	Putative glutamate--cysteine ligase 2	--	41.688	25.5	8	8	19	1.129	1.054	1.073	0.926	0.984	0.915	0.868	0.0096096
UPI0000135FE1	Putative amidohydrolase	--	48.841	28.5	10	10	21	1.061	1.08	1.09	0.96	0.91	0.935	0.868	0.00122839
UPI000013A338	AHS2 domain-containing protein	--	34.386	44.5	11	11	17	0.941	0.957	1.012	1.08	1.01	1.046	1.078	0.0627882
UPI00001B5118	D-cysteine desulfhydrase	--	35.153	39.3	12	12	29	1.074	1.067	1.066	0.944	0.906	0.948	0.872	0.000734164
UPI000013650F	Elongation factor P--(R)-beta-lysine ligase	--	36.976	21.5	6	6	10	1.1	1.08	1.026	0.896	0.912	0.986	0.871	0.0186365
UPI000013AC37	DUF1508 domain-containing protein	--	12.024	71.8	8	8	34	0.999	0.96	0.966	0.996	1.011	1.02	1.035	0.072458
UPI00001639A9	Septum site-determining protein MinD	--	29.614	51.5	15	15	62	1.007	1	0.955	1.025	0.993	1.009	1.022	0.312982
UPI000003EAE6	50S ribosomal protein L4	--	22.086	48.3	9	9	52	0.987	0.998	1.007	1.004	1.018	0.991	1.007	0.511868
UPI000003FF29	Cold-shock protein	--	7.4032	62.9	4	4	5	1.047	1.044	0.987	1.059	0.744	1.126	0.952	0.643655
UPI0000131335	DNA topoisomerase 4 subunit A	--	83.83	33.1	23	23	46	1.032	0.978	1.005	0.994	0.984	0.969	0.977	0.25849
UPI000012BA10	2,3-bisphosphoglycerate-independent phosphoglycerate mutase	--	56.193	49.8	16	16	48	0.964	0.953	0.943	1.04	1.051	1.052	1.099	0.000211544
UPI000003EB78	Ribosomal RNA small subunit methyltransferase G	--	23.431	34.3	6	6	9	0.993	1.031	1.055	0.982	0.962	0.993	0.954	0.0780108
UPI000013A8F0	Smr domain-containing protein	--	21.512	9.6	2	2	2	1.02	1.01	0.963	0.981	0.956	1.083	1.009	0.860955
UPI00001254BE	Acylphosphatase	--	10.3	16.3	2	1	3	1.03	1.163	1.024	0.913	1.012	0.877	0.871	0.0808509
UPI00001258AE	Allantoinase	--	49.601	61.8	22	22	100	1.249	1.235	1.248	0.756	0.748	0.767	0.609	4.28703e-07
UPI00000480CA	GTP cyclohydrolase-2	--	21.836	63.3	10	10	27	0.962	0.962	0.968	1.019	0.998	1.068	1.067	0.0333599
UPI000004CA97	2-amino-4-hydroxy-6-hydroxymethyldihyropteridine pyrophosphokinase	--	18.079	5.7	1	1	1
UPI0000110F14	2-dehydro-3-deoxyphosphooctonate aldolase	--	30.832	52.5	14	14	52	0.961	0.933	1.005	1.022	1.042	1.042	1.071	0.0370406
UPI0000110CEA	Cystathionine beta-lyase, PLP-dependent	--	43.212	22.3	7	7	9	0.869	0.99	1.119	0.952	1.102	0.988	1.021	0.78686
UPI00001260FB	L-asparaginase 2	--	36.85	58.3	15	15	108	0.907	0.951	0.922	1.048	1.066	1.108	1.159	0.00238372
UPI000012B55F	FCD domain protein	--	28.826	10.6	3	3	3	0.967	0.994	0.931	1.032	0.956	1.13	1.078	0.231075
UPI00000016FD	DNA mismatch repair protein MutL	--	67.923	32.8	17	17	24	0.982	1.013	1.008	0.988	1.003	1.022	1.003	0.820856
UPI00001118C8	Histidinol-phosphate aminotransferase	--	39.36	29.2	8	8	11	1.006	0.968	1.033	1.019	0.99	1.018	1.007	0.760311
UPI000013BB4F	Fructosamine kinase family protein	--	32.458	44.4	11	11	22	1.031	1.014	1.054	0.971	0.998	0.988	0.954	0.0272568
UPI00000540BB	Probable Sec-independent protein translocase protein TatE	--	7.0242	32.8	3	3	4	0.77	0.808	0.905	1.296	1.031	1.188	1.416	0.0135939
UPI0000047CB0	Protein FimG	--	17.317	10.8	1	1	1	0.914	1.002	0.74	1.014	1.069	1.272	1.263	0.103948
UPI000015C836	Bifunctional aspartokinase/homoserine dehydrogenase	--	89.119	32	18	18	41	1.18	1.166	1.195	0.84	0.729	0.838	0.68	0.00121
UPI00001309E7	NADH:ubiquinone oxidoreductase, chain E	--	18.59	69.3	8	8	36	1.014	1.013	1.019	0.97	0.985	1.011	0.974	0.0937379
UPI000013A960	Autoinducer-2 kinase	--	57.544	20.8	9	9	20	1.105	1.073	1.113	0.863	0.836	0.935	0.8	0.00311925
UPI0000168004	ATP-dependent helicase HrpB	--	90.817	22.2	15	15	17	0.939	1.015	0.987	0.962	0.969	1.04	1.01	0.780626
UPI000013A394	Zn-dependent 1,6-anhydro-N-acetylmuramyl-L-alanine amidase	--	31.072	15.6	3	3	4	0.94	1.064	0.818	1.293	1.056	0.828	1.126	0.510864
UPI0000137C9E	Universal stress protein F	--	16.016	47.9	6	6	24	1.067	1.077	0.966	0.924	1.001	0.95	0.924	0.136978
UPI000013A9C5	DUF2767 domain containing protein	--	7.9073	39.1	3	3	7	1.114	1.138	1.146	0.889	0.84	0.856	0.761	0.000127319
UPI0000168024	Cytosine deaminase	--	47.59	28.1	9	9	23	0.985	0.983	0.946	1.025	1.036	1.062	1.072	0.0145988
UPI000013A936	TonB-dependent Receptor Plug domain protein	--	89.282	2.7	2	2	2
UPI000013B06B	Putative sigma-54-dependent transcriptional regulator YgeV	--	66.095	26.9	11	11	18	1.072	1.114	1.102	0.906	0.908	0.959	0.843	0.00144852
UPI000003EB5F	Cell division protein FtsL	--	13.627	42.1	4	4	7	1.023	1.048	1.049	0.955	0.948	1.092	0.96	0.409517
UPI000003EB1A	Phosphate import ATP-binding protein PstB	--	29.027	38.5	8	8	13	0.997	0.923	0.894	1.144	1.063	1.064	1.162	0.0203287
UPI000003762D	Elongation factor P	--	20.591	38.3	7	7	22	1.028	1.067	0.994	1.018	1.005	0.981	0.972	0.299344
UPI00001286FE	Sensor protein	--	53.737	9.4	4	4	4	0.992	1.019	1.025	0.928	1.016	1.036	0.982	0.608151
UPI0000168022	2-methylisocitrate lyase	--	32.134	36.5	9	9	32	1.407	1.476	1.549	0.558	0.535	0.52	0.364	8.09068e-06
UPI000011050D	Isocitrate dehydrogenase [NADP]	--	45.756	61.3	28	28	191	0.97	0.974	0.965	1.03	1.023	1.025	1.058	7.38748e-05
UPI000013B41A	Universal stress protein	--	16.293	43	4	4	33	0.904	0.927	0.863	1.035	1.108	1.125	1.213	0.00432048
UPI000012C5C4	Putative uroporphyrinogen III C-methyltransferase	--	42.962	42.5	14	14	45	1.027	0.994	1.034	1.023	0.986	0.972	0.976	0.27562
UPI0000134331	Exoribonuclease 2	--	72.49	34.3	21	21	52	1.013	0.978	1.008	1.017	0.981	1.01	1.003	0.856907
UPI000012BC7C	Fused glutathionylspermidine amidase/glutathionylspermidine synthetase	--	70.531	42.5	21	21	36	0.895	0.834	0.936	1.144	1.074	1.092	1.242	0.00485133
UPI000013C138	Iron-sulfur cluster repair protein YtfE	--	24.882	41.4	8	8	11	0.919	0.998	0.963	1.035	0.996	1.113	1.092	0.0969342
UPI0000167FF5	Chaperone protein DnaJ	--	41.1	50	21	21	49	0.936	0.934	0.975	1.035	1.058	1.04	1.101	0.00336899
UPI000016F596	Ditrans,polycis-undecaprenyl-diphosphate synthase ((2E,6E)-farnesyl-diphosphate specific)	--	28.313	14.7	4	4	5	1.144	0.892	0.853	1.047	0.971	1.095	1.078	0.448987
UPI000012F0A0	2-keto-4-pentenoate hydratase	--	28.89	27.9	8	8	15	0.456	0.484	0.401	1.54	1.513	1.527	3.415	2.48628e-05
UPI0000127286	Multifunctional CCA protein	--	46.467	36.7	12	12	19	1.007	0.963	1.066	0.967	0.98	1.004	0.972	0.428135
UPI0000129763	DNA polymerase I	--	103.12	37.1	29	29	72	1.008	1.007	0.992	1.017	0.981	1.022	1.004	0.778997
UPI0000111347	Aspartate carbamoyltransferase	--	34.427	36	11	11	23	1.045	1.041	1.021	0.964	0.976	0.96	0.933	0.00139735
UPI0000136EA7	Thiamine import ATP-binding protein ThiQ	--	24.999	26.3	5	5	5
UPI00001268A5	HTH-type transcriptional regulator BetI	--	21.815	6.2	1	1	2	0.506	0.694	0.792	1.191	1.307	1.519	2.017	0.00906158
UPI0000136E2F	4-methyl-5(B-hydroxyethyl)-thiazole monophosphate biosynthesis enzyme	--	20.777	26.5	4	4	12	1.035	1.04	0.969	0.956	1.008	0.988	0.97	0.331503
UPI0000047C94	PF07332 family protein	--	15.147	14.2	2	2	3	1.037	0.947	1.124	0.824	0.956	1.049	0.91	0.324519
UPI0000128CE2	Siroheme synthase	--	49.951	38.3	14	14	23	1.015	1.006	0.952	1.033	0.944	1.043	1.016	0.708428
UPI000005E93B	Glycerol-3-phosphate transporter subunit	--	48.448	66	29	29	92	1.173	1.175	1.169	0.818	0.825	0.858	0.711	2.08685e-05
UPI00000380F1	Fructose-bisphosphate aldolase	--	39.147	46.5	15	15	73	0.982	1.003	0.955	0.951	1.032	1.04	1.028	0.442083
UPI000013A6D9	Dipeptide epimerase	--	34.674	18.4	6	6	9	1.082	1.088	1.024	0.984	0.962	0.906	0.893	0.0223166
UPI0000136FF3	Transketolase	--	73.042	41.2	25	23	73	1.042	1.034	1.047	0.967	1	0.975	0.942	0.00508598
UPI000013AC3D	Nucleoside transporter	--	47.359	3.3	1	1	2	1.059	0.959	1.022	1.127	0.942	0.895	0.975	0.716959
UPI0000168043	Glutamine-hydrolyzing asparagine synthetase B	--	62.658	55.4	24	24	50	0.985	0.991	0.964	1.033	1.014	1.012	1.04	0.0202167
UPI00001319C8	Transcriptional regulatory protein phoP	--	25.535	57.8	11	11	35	1.027	1.077	1.036	0.96	0.963	0.945	0.913	0.00454333
UPI000013B383	Auxiliary transport protein, membrane fusion protein (MFP) family protein	--	41.988	1.9	1	1	1
UPI0000112029	Aspartate ammonia-lyase	--	52.356	51	24	24	245	0.931	0.931	0.942	1.04	1.082	1.061	1.135	0.000467833
UPI000012EAA3	HTH-type transcriptional activator CmpR	--	34.364	28	8	8	11	1.081	0.986	1.081	0.938	0.979	0.986	0.922	0.079759
UPI00001286D8	Multicopper oxidase family protein	--	56.556	12.4	6	6	11	1.036	1.028	1.02	0.92	0.982	1.046	0.956	0.281252
UPI000012F006	Lipoprotein	--	29.431	47.2	13	13	42	0.907	0.926	0.948	1.116	1.082	1.036	1.163	0.00386502
UPI000013B545	Arginine:agmatine antiporter	--	46.842	2.5	1	1	1
UPI0000138FBC	Chain length determinant protein	--	36.454	25.8	8	8	18	1.05	1.055	1.018	0.978	0.985	0.935	0.928	0.0193092
UPI000012FA69	DNA mismatch repair protein MutS	--	95.246	35.4	24	24	37	1.018	1	0.985	1.038	0.986	1.021	1.014	0.485062
UPI00001268A7	Transporter, betaine/carnitine/choline family	--	75.841	3	2	2	3	1.036	0.97	1.008	0.99	1.008	1.001	0.995	0.825741
UPI000013A0D3	Pyrimidine/purine nucleoside phosphorylase	--	10.234	23.4	2	2	8	1.087	1.156	1.052	0.89	0.928	0.875	0.817	0.00353206
UPI00001121CF	Histidine--tRNA ligase	--	47.029	53.1	19	19	50	1.027	0.992	1.02	0.99	0.982	0.972	0.969	0.0557384
UPI000013AC2E	Chaperone	--	49.371	13.1	4	4	4	1.023	1.034	0.972	0.931	1.036	0.954	0.964	0.38015
UPI000012FD8A	Transcriptional regulator NarP	--	23.575	41.4	7	7	16	0.964	0.997	0.982	0.988	1.023	1.042	1.037	0.117806
UPI000013B589	LPS export ABC transporter permease LptF	--	40.357	11.5	5	5	7	1.018	0.934	1.01	0.992	0.999	0.984	1.004	0.863284
UPI000012B5D7	Surface composition regulator	--	7.8918	66.7	3	3	5	1.02	1.052	1.007	0.932	0.967	0.994	0.94	0.0513818
UPI000013389B	Transcription termination factor Rho	--	47.004	63.7	26	26	139	0.952	0.923	0.956	1.055	1.04	1.064	1.116	0.00105598
UPI0000128FDE	Cytosine-specific methyltransferase	--	53.464	30.1	12	12	20	0.991	0.992	1.021	0.94	0.965	1.015	0.972	0.306319
UPI000012EB09	Macrolide-specific efflux protein	--	40.623	30.7	10	10	11	1.082	1.002	1.049	0.935	0.935	0.945	0.898	0.00919859
UPI000013A986	Dihydrofolate reductase FolM	--	26.348	18.3	4	4	6	1.03	1.114	1.131	0.89	0.937	0.879	0.826	0.00552605
UPI000016800C	Proline--tRNA ligase	--	63.692	50.7	23	23	78	1.002	1.004	0.98	1.021	1.006	1.03	1.024	0.0858995
UPI000016804E	ATP-dependent dethiobiotin synthetase BioD	--	24.139	20.9	4	4	6	1.036	1.029	1.011	0.97	1.012	0.95	0.953	0.0731564
UPI00003B25EB	Oxidoreductase YdhF	--	33.675	27.9	9	9	20	0.997	1.018	0.991	0.976	1.022	1.014	1.002	0.915157
UPI00001653CD	Succinate--CoA ligase [ADP-forming] subunit alpha	--	29.777	57.4	14	14	71	1.003	0.996	0.989	1.006	0.992	1.014	1.008	0.352591
UPI00001653A0	Poly(A) polymerase I	--	52.548	36.3	16	16	24	1.028	1.045	0.994	0.97	0.981	0.982	0.956	0.0433583
UPI0000134E23	30S ribosomal protein S1	--	61.157	53.7	35	35	287	1.018	1.018	1.006	0.982	0.985	0.992	0.973	0.0050804
UPI000013B377	Putative DNA-binding transcriptional regulator	--	37.274	7.4	2	2	2	1.003	0.995	1.067	1.141	0.841	0.957	0.959	0.616877
UPI000013AE1B	Fatty acid oxidation complex subunit alpha	--	77.071	26.1	16	16	25	1.058	1.033	1.055	0.964	0.924	0.96	0.905	0.00297737
UPI000013A6CE	UPF0263 protein YciU	--	12.687	14.7	2	2	2	0.86	0.96	1.134	1.055	1.092	0.915	1.037	0.704196
UPI0000154D76	Flavodoxin	--	19.737	39.2	5	5	17	0.929	1.022	0.928	1	1.078	1.069	1.093	0.0880616
UPI00003B2606	Putative alcohol dehydrogenase	--	40.351	35.2	9	9	14	0.904	0.951	0.956	1.074	1.12	1.052	1.155	0.00495883
UPI000013AE97	FeS assembly protein IscX	--	7.7315	24.2	1	1	3	0.954	1.049	0.876	1.069	0.977	1.08	1.086	0.240564
UPI000003EB79	tRNA uridine 5-carboxymethylaminomethyl modification enzyme MnmG	--	69.52	25.8	15	15	32	1.034	1.046	1.07	0.983	0.927	0.966	0.913	0.0104927
UPI00001681BA	HTH-type transcriptional regulator MalT	--	103.12	17	14	14	16	1.156	1.218	1.175	0.846	0.792	0.808	0.689	0.00011627
UPI0000139065	Branched-chain amino acid ABC transporter, permease protein	--	41.03	10.4	3	3	4	1.312	1.196	1.299	0.716	0.658	0.841	0.582	0.00216352
UPI000013A5A9	Metallo-beta-lactamase superfamily protein	--	23.784	34.4	5	5	13	0.96	0.936	0.971	0.988	1.02	1.05	1.067	0.0357585
UPI000012A610	Phenylacetaldehyde dehydrogenase	--	53.699	15.8	7	7	10	1.125	1.259	1.17	0.801	0.8	0.832	0.685	0.000435713
UPI000013A371	Sulfatase	--	59.705	3	2	2	2	0.97	0.948	0.971	1.014	1.032	1.078	1.081	0.0170276
UPI000013B053	LOG family protein YgdH	--	50.971	55.1	19	19	67	0.999	1.018	1.01	1.009	0.978	0.97	0.977	0.149275
UPI000013A932	DUF2526 domain containing protein	--	8.7998	35.1	5	5	11	0.954	0.871	0.99	0.98	1.114	1.202	1.171	0.0924482
UPI000013BC8B	PF11776 domain protein	--	12.466	36.6	5	5	19	1.013	1.008	0.95	0.956	0.998	1.082	1.022	0.645372
UPI0001DBCE3C	Leu/Ile/Val-binding protein (LIV-BP)	--	39.647	18.3	6	6	9	1.123	1.272	0.995	0.793	0.836	0.942	0.758	0.0348409
UPI000013AC23	NAD dependent epimerase/dehydratase family protein	--	29.68	31	8	8	18	0.931	1.052	0.997	1.077	0.984	0.974	1.018	0.717547
UPI000013A680	Thiamine kinase	--	32.397	9.9	2	2	2	1.022	1.045	0.898	1.106	0.914	1.02	1.025	0.756504
UPI000013B407	Transcriptional regulator, DeoR/GntR family	--	28.507	46.7	12	12	26	0.978	0.942	0.958	1.016	1.039	1.052	1.08	0.00676152
UPI000013A675	Cupin family protein	--	42.578	27.6	8	8	27	0.998	0.988	1.038	1.019	1.01	0.94	0.982	0.561089
UPI000013A697	UPF0260 protein YcgN	--	17.91	37.3	4	4	6	1.03	0.964	1.066	0.997	0.946	0.886	0.925	0.155793
UPI0000036D1C	Beta-ketoacyl synthase domain-containing protein	--	42.613	54.4	15	15	83	0.952	0.949	0.966	1.029	1.065	1.053	1.098	0.00126506
UPI000013B040	CRISPR system Cascade subunit CasB	--	18.701	6.9	1	1	1	0.868	0.943	1.027	1.114	1.054	1.004	1.118	0.119595
UPI000013B1AC	Toxin-antitoxin system, toxin component, RelE family	--	17.836	19.5	3	3	5	1.008	1.032	0.977	0.976	0.994	1.025	0.993	0.750542
UPI000013234D	Propionate--coA ligase	--	69.35	38.1	20	20	42	1.56	1.541	1.517	0.447	0.49	0.481	0.307	2.22525e-06
UPI000013ABF6	DUF808 domain-containing protein	--	32.19	22.6	8	8	11	1.015	0.982	1.056	1.056	0.94	0.904	0.95	0.357528
UPI0000126B24	Thioredoxin/glutathione peroxidase BtuE	--	20.469	47.5	6	6	23	1.168	1.136	1.14	0.878	0.835	0.867	0.749	7.74797e-05
UPI000013A939	Phenazine biosynthesis protein PhzF family protein	--	32.318	12.8	2	2	3	1.108	0.916	0.9	0.983	1.146	0.958	1.056	0.557359
UPI000013434C	Ribonuclease 3	--	25.55	44.2	10	10	19	0.987	1.025	1.002	0.992	1.038	0.995	1.004	0.855641
UPI000012A2A6	Positive transcription regulator EvgS	--	22.69	36.3	6	6	12	0.987	1.08	1.034	0.966	1.003	0.956	0.943	0.123689
UPI000013A393	UPF0145 protein YbjQ	--	11.437	17.8	2	2	4	0.999	1	0.947	1.081	1.094	0.93	1.054	0.415056
UPI0000134428	Ribonuclease P protein component	--	13.789	32.8	4	4	4	0.958	0.855	1.09	1.062	0.984	1.037	1.062	0.430224
UPI000012A29D	Ethanolamine utilization protein EutQ	--	25.418	24.9	6	6	16	0.886	0.873	0.961	1.049	1.073	1.154	1.204	0.0109335
UPI000013C48C	DNA-binding protein transcriptional repressor, Zn(II)-binding protein	--	19.254	67.8	7	7	18	1.016	1.075	1.014	0.963	0.956	0.972	0.931	0.0227779
UPI000013AE42	Predicted DNA-binding transcriptional regulator	--	14.91	30	3	3	5	1.038	1.008	0.984	0.946	0.952	1.025	0.965	0.2923
UPI000013B5AD	Anti-adapter protein IraD	--	14.747	6.9	1	1	1	0.921	0.959	1.158	0.956	0.947	1.075	0.98	0.848934
UPI000013AEA8	Outer membrane lipoprotein	--	17.244	6.2	1	1	1
UPI000176AEBB	Putative protease involved in cellulose biosynthesis	--	58.944	8.9	4	4	8	1.126	1.084	1.019	0.92	0.938	0.952	0.87	0.0108391
UPI0000112942	ATP-dependent 6-phosphofructokinase	--	34.842	55.3	16	16	65	0.974	1.012	0.999	1.005	0.996	0.992	1.003	0.826011
UPI00001373C5	NAD-binding component of TrK potassium transporter	--	50.367	32.3	13	13	24	0.999	1.037	1.019	0.952	1.019	1.008	0.975	0.342079
UPI0000125745	Lipopolysaccharide core heptose(II)-phosphate phosphatase	--	22.256	25	4	4	7	1.272	1.2	1.215	0.716	0.831	0.811	0.64	0.000814956
UPI0000125BF9	Bis(5'-nucleosyl)-tetraphosphatase, symmetrical	--	31.296	21.1	7	7	7	1.062	1.037	1.052	0.967	0.965	1.041	0.944	0.0857669
UPI000012FD08	HAD hydrolase family	--	27.163	53.6	9	9	22	1.04	1.004	1.013	0.969	0.99	0.991	0.965	0.0505519
UPI0000059D29	Cold shock protein CspC	--	7.4023	78.3	4	4	57	1.047	1.059	1.021	0.95	0.949	0.975	0.919	0.00377919
UPI0000059A7E	Nitrogen regulatory protein P-II 1	--	12.425	44.6	5	5	11	1.159	1.043	1.064	0.93	0.954	0.9	0.852	0.0120985
UPI000013B221	DUF2559 domain containing protein	--	6.5985	36.4	1	1	6	0.958	1.086	1.025	1.058	0.909	0.968	0.956	0.471639
UPI0000047C6F	2-polyprenyl-6-methoxyphenol 4-hydroxylase	--	42.288	21.7	7	7	8	0.976	1.083	0.98	0.923	1.033	0.998	0.972	0.584197
UPI0000131632	Putative permease, PerM family	--	39.194	4	1	1	1
UPI000012628A	Magnesium-translocating P-type ATPase	--	99.465	20.6	15	15	21	1.118	1.109	1.112	0.898	0.881	0.9	0.802	6.71399e-06
UPI000013BECE	Fructose-1-P and 6-phosphogluconate phosphatase	--	20.78	28.7	3	3	6	1	1.037	1.081	0.98	0.88	1.006	0.919	0.141486
UPI000013ADD7	Probable 4-deoxy-4-formamido-L-arabinose-phosphoundecaprenol deformylase ArnD	--	33.111	26	7	7	14	1.078	1.079	1.136	0.892	0.926	0.865	0.815	0.00144814
UPI000013A348	Pectinesterase	--	46.082	29	10	10	24	0.897	0.908	0.951	1.18	1.038	0.979	1.16	0.0657769
UPI0000129FE0	Putative transcriptional regulator EnvR	--	25.198	5	1	1	1	1.172	1.049	0.906	0.93	0.962	0.991	0.922	0.377915
UPI00001680A0	FMN-dependent NADH-azoreductase	--	21.657	27.4	6	6	19	0.846	0.905	0.826	1.097	1.127	1.206	1.331	0.00189093
UPI000013B3FA	Predicted sugar phosphate isomerase	--	36.941	26.4	7	7	8	0.92	1.123	1.053	0.974	0.946	0.931	0.921	0.258737
UPI000003EB55	Pyruvate kinase	--	51.357	58.1	23	23	104	0.945	0.932	0.946	1.06	1.07	1.066	1.132	2.32431e-05
UPI0000136ED3	L-threonine synthase	--	47.113	38.3	12	12	40	1.189	1.165	1.188	0.862	0.782	0.867	0.709	0.000538501
UPI000013BC5D	UPF0181 protein YoaH	--	6.5542	25.4	1	1	1	1.066	0.94	1.168	0.874	0.931	1.037	0.895	0.246205
UPI000013A9B4	Predicted DNA-binding transcriptional regulator	--	22.275	23.6	4	4	5	1.045	0.938	1.06	1.058	0.938	0.967	0.974	0.642746
UPI000013A0B1	Predicted oxidoreductase with molybdenum-binding domain	--	78.087	5.3	3	3	3	1.491	1.307	1.31	0.651	0.562	0.701	0.466	0.000608412
UPI000012EF8B	Methylenetetrahydrofolate reductase	--	33.102	10.8	3	3	4	0.827	0.894	0.894	1.1	1.13	1.164	1.298	0.00104441
UPI000012F819	N-methyl-L-tryptophan oxidase	--	40.902	21.8	8	8	18	0.967	1.031	0.996	1.026	1.044	0.995	1.024	0.367733
UPI000013ABC2	Inner membrane protein yebE	--	23.687	19.2	4	4	9	1.093	1.112	1.038	0.948	0.902	0.907	0.85	0.00336396
UPI0000137F17	Uronate isomerase	--	53.987	43.2	19	19	46	0.782	0.813	0.819	1.219	1.204	1.172	1.489	2.72283e-05
UPI000013A92A	DNA-binding helix-turn-helix protein	--	16.105	11	2	2	2
UPI00001681AB	Acetylornithine/succinyldiaminopimelate aminotransferase	--	43.766	24.1	9	9	10	0.975	0.947	0.992	1.022	0.999	1.09	1.068	0.0919194
UPI000012C742	ATP phosphoribosyltransferase	--	33.366	40.8	11	11	19	1.009	0.975	1.002	1.057	1.015	0.982	1.023	0.40272
UPI0000129E3D	Acetyltransferase, GNAT family	--	17.419	11.1	2	2	3	1.19	1.173	1.05	0.848	0.832	0.925	0.763	0.00624745
UPI000012FA8B	Probable lipid II flippase MurJ	--	55.267	6.5	3	3	4	1.062	0.974	1.148	1.03	0.942	0.855	0.888	0.170865
UPI0000168115	Cytochrome c biogenesis ATP-binding export protein CcmA	--	22.865	18	2	2	4	0.923	0.954	0.966	1.05	1.16	0.991	1.126	0.0717521
UPI0000126B1B	Vitamin B12 transporter BtuB	--	68.406	27	13	13	19	1.07	1.026	1.106	1.043	0.958	0.813	0.879	0.15386
UPI0000000EAE	Aspartate-semialdehyde dehydrogenase	--	40.017	30.8	7	7	21	1.054	1.046	0.993	0.928	0.995	0.982	0.939	0.0916765
UPI000004959D	7-alpha-hydroxysteroid dehydrogenase, NAD-dependent	--	26.778	48.2	12	12	87	0.979	0.96	0.907	1.083	1.075	1.041	1.124	0.01062
UPI0000047C5A	30S ribosomal protein S7	--	20.019	51.4	11	11	63	0.992	0.99	1.028	1.006	1	0.986	0.994	0.687705
UPI000012E896	Leucyl/phenylalanyl-tRNA--protein transferase	--	26.618	15.8	3	3	3	0.941	1.062	0.883	1.11	0.989	1.024	1.082	0.276019
UPI000012A298	Ethanolamine utilization protein EutM	--	9.8654	76.3	6	6	32	0.89	0.954	0.914	1.075	1.088	1.086	1.178	0.00133387
UPI000012B406	Gamma-glutamyltransferase	--	61.767	37.2	19	19	33	1.357	1.388	1.401	0.632	0.607	0.616	0.447	7.48798e-07
UPI000013B09D	Pyridoxal phosphate homeostasis protein	--	25.787	38.9	8	8	20	0.963	0.97	0.979	0.996	1.068	1.045	1.068	0.0371345
UPI000013A2AC	Transcriptional repressor NrdR	--	17.229	50.3	6	6	18	1.116	1.032	0.958	0.95	0.981	0.988	0.94	0.257441
UPI0001B525AB	2-hydroxy-6-oxononadienedioate/2-hydroxy-6-oxononatrienedioate hydrolase	--	31.937	47.9	14	14	51	0.243	0.22	0.276	1.664	1.652	1.682	6.763	8.30274e-06
UPI000013B38C	Divergent polysaccharide deacetylase	--	35.352	11.9	3	3	3	1.004	1.006	1.078	0.933	0.992	1.002	0.948	0.173168
UPI000013BB69	Predicted phosphatidyl transferase, inner membrane protein	--	22.752	5.3	1	1	2	0.951	0.953	1.118	1.113	0.913	0.961	0.988	0.885199
UPI000013BFAE	Predicted toluene transporter subunit: ATP-binding component of ABC superfamily	--	29.096	42	8	8	16	0.958	0.994	1.051	1.022	1.024	1.06	1.034	0.308383
UPI000013B41D	Orthopoxovirus protein, PF05708 family	--	23.139	5.9	1	1	1	1.028	1.008	0.941	0.956	0.95	1.129	1.019	0.802049
UPI0000130181	Nickel-responsive regulator	--	15.094	21.1	3	3	5	0.961	0.977	1.028	0.981	1.084	0.982	1.027	0.536112
UPI0000111C7E	Bifunctional protein GlmU	--	49.19	46.1	16	16	37	1.024	0.99	1.012	0.979	0.996	0.993	0.981	0.161034
UPI000012B8D7	LacI family regulatory protein	--	36.422	20.5	5	5	13	1.019	1	1.012	0.998	1.039	0.99	0.999	0.92879
UPI000013B1E0	DUF1471 domain-containing protein	--	9.1963	49.4	3	3	30	0.305	0.387	0.343	1.245	1.341	1.44	3.89	7.18918e-05
UPI00001311A4	Phenylacetate-coenzyme A ligase	--	48.952	27.5	12	12	17	1.403	1.443	1.396	0.622	0.553	0.633	0.426	4.01665e-05
UPI00000480BA	Aldehyde dehydrogenase A (Lactaldehyde dehydrogenase)(Glycolaldehyde dehydrogenase)	--	52.272	54.7	23	23	52	1.182	1.164	1.23	0.801	0.812	0.825	0.682	3.23195e-05
UPI000013A596	UPF0434 protein YcaR	--	6.8549	83.3	6	6	15	1.026	1.049	0.956	0.964	1.026	1.006	0.988	0.755438
UPI00001312BB	Aspartate 1-decarboxylase	--	13.834	26.2	3	3	7	1.144	1.075	0.914	0.967	0.975	0.99	0.936	0.409134
UPI000013A6BB	DUF892 domain-containing protein	--	18.961	45.2	7	7	36	1.291	1.301	1.286	0.689	0.709	0.698	0.54	2.67738e-07
UPI000012A290	Ethanolamine utilization dehydrogenase	--	41.031	2.8	1	1	1
UPI00005EF85F	ATP-dependent RNA helicase DeaD	--	70.545	18.6	10	10	14	0.972	0.945	0.954	1.076	0.891	1.167	1.092	0.368131
UPI000002C675	Biotin synthase	--	38.648	17.1	5	5	7	1.047	1.222	1.252	0.686	0.816	0.747	0.639	0.00398358
UPI0000135C72	Predicted inner membrane peptidase	--	39.366	47.6	14	14	26	0.99	1.004	0.99	1.022	0.972	0.976	0.995	0.782659
UPI00001368EA	Oxidoreductase, aldo/keto reductase family protein	--	38.499	24.6	9	9	14	0.991	1.041	1.102	0.952	0.996	1.006	0.943	0.170533
UPI0000165546	50S ribosomal protein L1	--	24.729	64.1	16	16	116	0.978	0.986	1.003	1.004	1.012	1	1.017	0.116463
UPI000013AE8E	Conserved protein	--	24.439	10	1	1	2	1.063	1.182	1.062	0.962	0.972	0.776	0.819	0.0674805
UPI00001378B7	DNA-binding transcriptional dual regulator, tyrosine-binding	--	57.655	43.5	20	20	29	1.011	1.001	1.008	0.996	1.017	0.934	0.976	0.385296
UPI0000130EC0	Periplasmic protein	--	21.073	57.7	10	10	105	1.127	1.169	1.1	0.847	0.891	0.864	0.766	0.000319088
UPI0000000D1E	Phospholipid-binding domain protein	--	20.028	61.3	9	9	17	0.923	0.911	1.018	1.144	1.05	0.925	1.094	0.287733
UPI00001251B5	Acetyl-coenzyme A carboxylase carboxyl transferase subunit beta	--	33.322	36.5	14	14	47	1.014	1.016	0.97	1.016	0.998	0.999	1.004	0.794156
UPI000012E09F	Ribosomal RNA small subunit methyltransferase A	--	30.42	26	6	6	10	0.993	0.978	0.985	0.991	0.995	0.977	1.002	0.755914
UPI0000136D50	L-threonine dehydratase catabolic TdcB	--	35.232	13.1	3	3	3	1.217	0.982	0.955	0.876	0.977	0.98	0.898	0.293638
UPI000011F50A	LacI family DNA-binding transcriptional regulator	--	34.124	17.6	6	6	7	0.975	0.946	0.98	1.075	1.002	1.056	1.08	0.0323449
UPI000012917D	Serine endoprotease, periplasmic	--	37.581	25.4	8	8	15	0.975	0.961	1.015	1.107	1.011	1.012	1.061	0.164092
UPI00001B512E	5-formyltetrahydrofolate cyclo-ligase	--	23.241	11	2	2	2
UPI0000683E8D	M48 family metallopeptidase	--	19.482	21	4	4	5	1.1	0.952	1.253	0.794	0.951	0.972	0.822	0.130442
UPI00005F0BBC	Two-component response regulator	--	26.704	30.1	7	7	13	0.963	0.966	0.905	1.013	1.022	1.064	1.094	0.0263686
UPI0000047C6B	Formate dehydrogenase iron-sulfur subunit	--	32.238	48.6	17	14	50	0.981	0.927	0.974	1.11	1.05	1.009	1.1	0.0453744
UPI000013BFB3	3-deoxy-D-manno-octulosonate 8-phosphate phosphatase KdsC	--	19.997	20.2	3	3	9	1.004	0.99	0.926	0.959	1.04	1.043	1.042	0.33373
UPI000013AEAC	Autonomous glycyl radical cofactor	--	14.284	78.7	12	11	69	0.815	0.806	0.769	1.161	1.208	1.229	1.505	7.55492e-05
UPI0000047C57	Signal peptidase I	--	35.96	27.5	11	11	22	1.045	1.057	1.053	0.999	0.961	0.924	0.914	0.0166129
UPI00000371B7	Galactose-proton symporter	--	50.982	1.7	1	1	1	0.893	0.836	1.041	1.144	1.146	0.948	1.169	0.158625
UPI0000683E5B	AraC family transcriptional regulator	--	27.065	14.9	3	3	3	1.027	1.207	1.068	0.959	0.94	0.817	0.823	0.0492913
UPI000013521C	Predicted dehydratase	--	45.968	9.9	4	4	4	0.993	0.935	0.967	1.029	1.049	1.036	1.076	0.0161458
UPI0000133D38	50S ribosomal protein L21	--	11.564	43.7	5	5	24	0.983	1.016	1.014	0.981	1.027	0.981	0.992	0.685753
UPI000012A7A4	Adenosine monophosphate-protein transferase	--	22.96	34.5	5	5	14	0.979	1.138	1.068	0.913	0.957	0.966	0.89	0.0715002
UPI000012EECF	HTH araC/xylS-type domain-containing protein	--	34.927	17.9	5	5	5	1.072	0.998	0.997	1.035	0.95	1.056	0.992	0.83491
UPI0000135227	Two component sensor kinase	--	49.282	11.1	4	4	5	1.024	1.105	0.99	0.963	0.823	1.11	0.929	0.432112
UPI000012ACC2	Cell division ATP-binding protein FtsE	--	24.439	45.5	9	9	20	0.961	1.007	0.946	0.973	1.042	1.04	1.048	0.183399
UPI000012A297	Ethanolamine utilization protein	--	22.788	14.6	3	3	10	0.971	0.958	0.924	1.058	1.04	1.016	1.091	0.0097632
UPI000013A5A3	Macrodomain Ter protein	--	17.693	24	5	5	10	0.952	1.095	0.984	0.978	0.97	1.009	0.976	0.62719
UPI0000129FD4	Amino acid adenylation domain protein	--	141.99	1.5	2	2	2	0.926	1.012	1.066	1.008	1.017	0.985	1.002	0.936397
UPI000012F231	Lytic murein transglycosylase B	--	40.255	9.4	2	2	3	0.97	0.894	1.019	1.148	0.991	0.983	1.083	0.282263
UPI000012F466	Mannosyl-3-phosphoglycerate phosphatase	--	30.439	19.6	5	5	12	0.996	0.984	1.043	0.965	0.97	0.984	0.966	0.136439
UPI0000131391	D-alanyl-D-alanine carboxypeptidase/D-alanyl-D-alanine-endopeptidase	--	51.798	23.5	9	9	14	0.958	0.945	1.074	1.027	0.987	1.02	1.019	0.654153
UPI000012E7C0	Outer-membrane lipoprotein LolB	--	23.55	57	11	11	22	1.019	0.93	0.991	1.125	1.003	0.93	1.04	0.580414
UPI00001132A2	1-deoxy-D-xylulose 5-phosphate reductoisomerase	--	43.388	35.9	13	13	26	0.976	1.043	0.972	1.005	1.023	1.023	1.02	0.437113
UPI000013B024	Nitrous oxide-stimulated promoter family protein	--	13.94	9.4	1	1	1	0.866	1.012	0.831	1.13	1.018	1.149	1.217	0.0488196
UPI00000D0672	Putative transcriptional regulator	--	26.076	20.4	4	4	7	1.069	1.11	1.02	0.946	0.916	0.951	0.879	0.00914349
UPI00005EED3B	Glucans biosynthesis protein G	--	58.678	43.3	20	20	67	1.014	1.026	0.984	0.984	0.992	1.017	0.99	0.554724
UPI00001107EF	D-erythro-7,8-dihydroneopterin triphosphate epimerase	--	14.082	37.5	4	4	16	1.039	1.035	0.962	0.996	0.971	1.029	0.987	0.690324
UPI000012F134	Cell division topological specificity factor	--	10.235	72.7	8	8	19	1.03	1.011	1.021	0.988	0.955	1.023	0.969	0.192366
UPI0000134827	RNA polymerase sigma factor RpoD	--	70.263	27.4	19	19	52	0.998	0.984	0.951	1.007	1.028	1.006	1.037	0.0852241
UPI000013A32D	DUF1722 domain-containing protein	--	20.211	20.7	3	3	3	1.026	1.08	1.087	1.059	0.745	1.011	0.882	0.286551
UPI0000135738	L-serine dehydratase	--	48.752	29.9	12	10	35	1.14	1.162	1.086	0.847	0.841	0.859	0.752	0.000173052
UPI000013AC39	Predicted peptidase	--	51.193	32.7	14	14	21	1.04	1.003	1.001	0.964	0.945	1.076	0.981	0.644106
UPI000013A98F	Protein YdgH	--	33.903	62.4	18	18	63	0.99	1.004	0.947	0.988	1.002	1.073	1.041	0.263264
UPI000012FD6E	Ferredoxin-type protein NapF	--	18.047	6.7	1	1	1	0.953	1.045	1.019	0.928	0.949	1.122	0.994	0.899274
UPI000013BDC3	Putative cytoplasmic protein	--	8.4149	27.8	2	2	2
UPI00001337A7	ADP-heptose:LPS heptosyl transferase I	--	35.543	26.6	7	7	9	1.071	1.003	0.954	0.938	0.988	1	0.966	0.436581
UPI000011E140	Cytochrome b562	--	13.281	45.5	7	7	24	1.212	1.182	1.173	0.78	0.865	0.82	0.691	0.000297861
UPI00001681C4	Nickel import ATP-binding protein NikE	--	29.721	6.7	2	2	4
UPI000012944B	AKR5D	--	29.436	33	6	6	11	0.876	0.941	0.93	1.094	1.135	1.086	1.207	0.00193916
UPI000013ADD9	Undecaprenyl phosphate-alpha-4-amino-4-deoxy-L-arabinose arabinosyl transferase	--	62.542	7.1	3	3	4	0.992	1.062	1.059	0.982	1.108	0.812	0.932	0.45082
UPI000013A69C	Dihydroxyacetone kinase, L subunit	--	22.632	41	8	8	20	0.947	1.03	0.964	0.966	1.035	1.047	1.036	0.374926
UPI000013A5E7	Lipoprotein	--	41.137	53.6	17	17	29	0.913	0.9	0.878	1.108	1.094	1.144	1.243	0.00024091
UPI00001300E2	Pyruvate:ferredoxin (Flavodoxin) oxidoreductase	--	128.82	27.9	28	28	52	0.98	0.986	0.992	1.015	1.03	1.008	1.032	0.0122136
UPI000012CFCB	Hydrogenase 1 maturation protease	--	21.546	36.4	4	4	6	0.966	0.989	0.967	1.092	1.004	0.939	1.039	0.461333
UPI00001301A7	Nitrite reductase [NAD(P)H], large subunit	--	93.12	39.1	33	33	61	0.935	0.948	0.942	1.054	1.075	1.054	1.127	0.00010092
UPI00001639F9	Enolase	--	45.654	71.1	21	21	214	0.985	1.008	1	0.988	1.028	1	1.008	0.60669
UPI0000168220	Orn/Lys/Arg decarboxylase, major domain protein	--	84.555	16.3	11	11	11	0.613	0.646	0.699	1.283	1.416	1.332	2.059	0.000111265
UPI0000125D6C	L-arabinose-binding periplasmic protein	--	35.54	62.6	16	16	55	1.199	1.219	1.168	0.778	0.798	0.82	0.668	3.31332e-05
UPI0000167FFA	Ribulokinase	--	61.089	15	7	7	8	1.12	1.006	1.057	1.017	0.944	0.93	0.908	0.0819736
UPI000013AC02	Response regulator transcription factor HprR	--	25.017	7.6	2	2	2
UPI000013A95B	Anaerobic sulfatase maturase	--	44.517	6.2	3	3	4	1.131	0.902	0.9	0.967	1.225	0.929	1.064	0.626877
UPI000013A962	Transcriptional regulator lsrR	--	33.796	19.2	5	5	11	1.054	1.042	1.112	0.938	0.955	0.947	0.885	0.00421157
UPI00001680E7	Trehalose-6-phosphate synthase	--	53.61	38.8	18	18	50	1.025	0.984	0.99	1.006	1.007	1.004	1.006	0.65489
UPI00001639B5	PTS mannose transporter subunit IIAB	--	35.047	41.5	16	16	60	0.922	0.95	0.876	1.064	1.126	1.056	1.181	0.00588569
UPI000012919F	Deoxyribose-phosphate aldolase	--	27.733	54.1	15	15	44	0.929	0.934	0.874	1.064	1.099	1.082	1.186	0.00183707
UPI0000168202	Superoxide dismutase	--	23.097	56.3	11	11	42	0.996	1.026	0.958	1.012	1.017	0.987	1.012	0.604081
UPI000012C36F	HCP oxidoreductase, NADH-dependent	--	35.74	9.6	3	3	3	2.006	0.952	0.497	0.738	0.764	1.034	0.734	0.716766
UPI00001681A2	Putative amino-acid ABC transporter-binding protein YhdW	--	33.425	41	11	11	14	1.307	1.391	1.331	0.618	0.617	0.642	0.466	4.56874e-06
UPI0000134A54	Ribosomal RNA large subunit methyltransferase E	--	23.335	34	6	6	14	1.007	0.969	1.014	1.031	1.031	0.998	1.023	0.262068
UPI000012C773	Histidine biosynthesis bifunctional protein HisIE	--	22.756	20.7	4	4	8	0.971	0.986	0.94	1.048	1.015	1.083	1.086	0.0245989
UPI0000134E93	30S ribosomal protein, S22 family	--	5.0958	57.8	4	4	14	0.94	0.919	1.085	0.991	1.058	1.018	1.042	0.477639
UPI00000B24F0	UPF0370 protein YpfN	--	8.0713	39.4	2	2	3	0.941	0.843	0.995	1.2	1.043	0.981	1.16	0.12832
UPI000013A587	Isochorismatase family protein	--	23.1	53.8	8	8	58	1.164	1.2	1.154	0.834	0.82	0.812	0.701	1.51433e-05
UPI000003EB6B	50S ribosomal protein L17	--	14.364	45.7	8	8	25	0.91	0.964	1.02	1.053	1.039	1.018	1.075	0.101038
UPI00003B2601	Amino acid transporter	--	33.504	20.6	6	6	9	0.983	1.064	1.04	1.003	0.957	0.93	0.936	0.110457
UPI00000540BF	Sec-independent protein translocase protein TatB	--	18.421	53.8	10	10	19	1.017	0.956	0.995	0.979	0.998	0.99	1	0.998375
UPI00001257D9	Aldehyde dehydrogenase B	--	56.306	40	25	25	79	1.212	1.183	1.205	0.774	0.774	0.815	0.656	2.29518e-05
UPI000012D123	Small heat shock protein IbpA	--	15.774	48.9	5	5	14	1.146	1.012	1.17	0.939	0.862	0.935	0.822	0.0215736
UPI000004F5DF	UPF0056 inner membrane protein	--	23.521	3.7	1	1	1	0.954	1.145	0.855	0.922	1.013	1.128	1.037	0.71696
UPI000013A30C	Endoribonuclease YbeY	--	17.525	9.7	1	1	3	0.961	1.011	1.013	1.077	0.854	1.09	1.012	0.943282
UPI0000128EA1	2,3,4,5-tetrahydropyridine-2,6-dicarboxylate N-succinyltransferase	--	29.892	41.6	11	11	34	0.953	0.952	0.958	1.058	1.049	1.037	1.098	0.000106958
UPI0000047CAF	Fimbrial domain-containing protein	--	18.715	8	1	1	3	0.902	1.068	0.952	0.896	1.094	1.108	1.06	0.543069
UPI0000168078	Ribonuclease E	--	118.2	40.7	35	35	122	1.036	1.022	1.03	0.999	0.962	0.972	0.95	0.0123867
UPI0000110E6D	Aspartate carbamoyltransferase regulatory chain	--	17.12	56.9	7	7	12	1.036	1.056	0.996	0.931	0.943	0.988	0.927	0.0381268
UPI000011DD53	Gamma-glutamylcyclotransferase YtfP	--	12.866	22.1	2	2	8	0.979	0.994	0.93	0.994	1.066	1.035	1.066	0.0884834
UPI000013AC07	Protein-methionine-sulfoxide reductase catalytic subunit MsrP	--	37.368	27.2	7	7	12	0.98	0.99	1.008	0.929	1.019	1.04	1.003	0.953239
UPI000012F0BD	tRNA dimethylallyltransferase	--	35.065	48.1	11	11	17	0.961	1.003	1.029	0.991	1.036	1.033	1.022	0.414758
UPI000013B52A	Thiamine phosphate synthase	--	15.656	50.7	5	5	9	0.928	0.988	0.842	0.95	1.055	1.221	1.17	0.150042
UPI000012E129	Low affinity potassium transport system protein kup	--	69.293	6.6	3	3	5	0.972	0.93	1.07	0.903	0.99	0.998	0.973	0.63429
UPI0000168206	Primosomal protein N'	--	81.654	6	4	4	4	0.974	0.968	1.017	0.943	1.088	1.021	1.031	0.541223
UPI000012BB1F	Protein GrpE	--	21.798	29.4	8	8	22	0.923	0.933	0.931	0.997	1.089	1.089	1.139	0.0119298
UPI000000E100	UPF0757 protein YmgG	--	10.807	43.9	3	3	6	0.88	0.936	0.875	1.118	0.986	1.184	1.222	0.027229
UPI000013C141	Predicted inner membrane protein	--	49.762	24.4	9	9	13	0.962	0.972	1.009	1.073	1.043	0.982	1.053	0.163924
UPI0000125D9E	Aerobic respiration control sensor protein	--	87.982	32	23	23	43	0.996	1.018	0.974	1.014	0.973	1.015	1.005	0.81784
UPI000003CAA6	NAD(P)H-flavin reductase	--	26.242	51.9	7	7	13	1.019	1.015	1.032	1.034	0.954	0.988	0.971	0.272522
UPI000013A9A5	Glutaredoxin	--	12.879	52.2	5	5	21	1.02	0.976	0.984	0.963	0.999	1.016	0.999	0.973478
UPI0000139FF3	UPF0246 protein YaaA	--	29.585	33.7	6	6	15	1.046	1.057	1.024	0.944	0.956	1.01	0.931	0.0336291
UPI0000132865	Phosphoenolpyruvate-protein phosphotransferase ptsP	--	83.715	25.5	16	16	25	0.958	0.976	1.037	1.026	0.994	1.01	1.02	0.47529
UPI000003EB36	N-succinylarginine dihydrolase	--	49.298	28.4	10	10	25	1.376	1.367	1.332	0.682	0.661	0.69	0.499	1.76492e-06
UPI0000047C66	Autoinducer 2-binding protein lsrB	--	36.684	32.6	7	7	19	1.176	1.158	1.102	0.806	0.89	0.914	0.76	0.00302482
UPI000003EB68	D-alanine--D-alanine ligase	--	32.839	37.3	10	10	17	0.984	0.964	0.989	1.003	1.058	1.051	1.06	0.0358316
UPI000012B0DE	Galactarate dehydratase (L-threo-forming)	--	56.401	42.3	16	16	33	1.112	1.111	1.1	0.9	0.89	0.868	0.8	3.79912e-05
UPI000011044B	Aminotransferase	--	43.573	63.1	24	24	95	0.976	0.982	0.974	1.027	1.03	1.028	1.052	4.03884e-05
UPI00001119B5	Transcription elongation factor GreA	--	17.641	61.4	11	11	39	1.045	1.06	1.016	0.963	0.98	0.974	0.935	0.00744195
UPI000012EE78	Phosphoglycerol transferase I	--	85.493	23.3	16	16	25	1.09	1.065	1.048	0.938	0.925	0.953	0.879	0.000841833
UPI000012EB4A	Maltose/maltodextrin ABC transporter, permease protein MalF	--	57.013	5.3	2	2	2
UPI000013572F	L-serine dehydratase	--	48.906	24.7	10	9	45	0.966	0.963	0.968	1.061	1.031	1.028	1.077	0.00190634
UPI000013A2C8	Predicted transporter subunit: ATP-binding component of ABC superfamily	--	24.533	16.7	4	4	8	1.143	1.099	1.037	0.903	0.913	0.892	0.826	0.00279526
UPI000013461C	Ribulose-phosphate 3-epimerase	--	24.554	32.9	6	6	19	1.021	1.029	1.043	0.958	1.018	0.958	0.949	0.0661431
UPI0000110FD5	4-hydroxy-tetrahydrodipicolinate synthase	--	31.27	51.7	12	12	41	0.999	0.971	0.966	1.013	1.006	1.025	1.037	0.0372208
UPI0000168020	NAD/NADP-dependent betaine aldehyde dehydrogenase	--	52.911	26.3	11	11	17	1.15	1.11	1.055	0.875	0.929	0.953	0.832	0.00660938
UPI0000136DBD	Bifunctional hydroxy-methylpyrimidine kinase/hydroxy-phosphomethylpyrimidine kinase	--	28.633	38.7	7	7	17	1.03	1.083	1.049	0.96	0.963	0.946	0.907	0.00344326
UPI000003EB65	Probable peptidoglycan glycosyltransferase FtsW	--	45.987	7.2	3	3	4	1.042	1.034	1.07	1.036	0.882	0.945	0.91	0.113838
UPI000012D6F8	Putative integrase KpLE2 phage-like element	--	45.582	3.5	2	2	2	0.977	0.986	1.068	1.046	0.966	0.968	0.983	0.684471
UPI000013B581	TetR family transcriptional regulator	--	21.501	22.3	4	4	5	1.036	1.015	1.054	0.888	0.97	1.028	0.929	0.163756
UPI00001291CA	DeoR family transcriptional regulator	--	28.548	29	6	6	12	0.959	1.013	0.92	1.024	1.038	1.02	1.066	0.085909
UPI0000157414	N-acetylneuraminate lyase	--	32.593	38.4	9	9	25	0.994	0.917	0.92	1.04	1.06	1.045	1.111	0.0171632
UPI00003B2608	D-galactonate dehydratase	--	42.522	2.4	1	1	2
UPI0000135739	DNA-binding transcriptional activator SdiA	--	28.117	11.2	2	2	3	1.122	1.062	1.04	0.922	0.904	0.966	0.866	0.00868516
UPI000018FAE5	Ribose operon repressor	--	36.308	17.4	5	5	6	1.057	1.07	1.082	0.936	0.987	0.952	0.896	0.0029535
UPI000012B80E	Glutamate and aspartate transporter subunit membrane component of ABC superfamily	--	27.502	17.1	3	3	3	1.281	1.32	1.288	0.714	0.659	0.763	0.549	0.000157088
UPI000013A058	TsaA-like domain-containing protein	--	26.362	22.6	4	4	4	0.998	1.044	0.923	1.031	0.988	1.104	1.053	0.341674
UPI00001309FB	NADH-quinone oxidoreductase subunit H	--	36.219	12.9	3	3	3	0.982	0.888	1.144	1.048	1.072	0.878	0.995	0.970925
UPI000012AFD7	Acid resistance regulon transcriptional activator	--	31.562	31.4	6	6	15	0.84	0.892	0.872	1.107	1.12	1.184	1.31	0.000575401
UPI000013A2CE	ABC transporter permease	--	28.164	12	3	3	8	1.065	0.945	1.015	1.03	1.023	0.936	0.988	0.813311
UPI000013A0D1	Anti-adapter protein IraP	--	9.9374	31.4	3	3	9	0.984	1.011	1.39	0.994	0.915	0.707	0.773	0.16642
UPI000012CA9E	Regulator of RpoS	--	37.302	19	5	5	7	0.999	1.03	1.06	1.026	0.952	0.902	0.932	0.158258
UPI000013799F	Ubiquinone biosynthesis O-methyltransferase	--	26.555	72.5	13	13	17	0.977	1.022	1.035	1.032	0.947	1.005	0.984	0.611914
UPI0000131F9E	Spermidine/putrescine import ATP-binding protein PotA	--	41.93	19.6	6	6	6	1.234	1.231	1.245	0.784	0.707	0.731	0.599	7.43891e-05
UPI00016DBDE6	Bifunctional NAD(P)H-hydrate repair enzyme	--	54.064	24.1	11	11	21	0.997	0.992	1.076	0.962	1.022	0.934	0.952	0.258301
UPI0001DB908C	Adenosylmethionine-8-amino-7-oxononanoate aminotransferase	--	45.019	10.7	4	4	4	1.062	1.072	1.053	0.903	0.962	0.965	0.888	0.00584277
UPI000013A944	D-ala-D-a la transporter subunit	--	57.641	26.4	12	12	17	1.244	1.282	1.253	0.749	0.705	0.715	0.574	1.08534e-05
UPI000013BB1A	Conserved protein	--	13.544	9.2	1	1	1	1.079	1.063	1.011	0.838	1.025	1.003	0.909	0.212324
UPI000013AE83	Outer membrane protein assembly factor BamB	--	41.887	33.7	12	12	27	0.958	0.897	0.979	1.133	1.096	0.92	1.111	0.217463
UPI000018FA47	Hexuronate transporter	--	46.892	7.6	2	2	3	0.874	0.885	0.923	1.016	1.161	1.078	1.214	0.0101497
UPI000013A922	Conserved protein	--	51.042	37.6	16	16	22	1.207	1.202	1.261	0.812	0.772	0.752	0.637	7.73187e-05
UPI0000126760	Sensory histidine kinase in two-component regulatory system with BaeR	--	51.991	7.5	4	4	5	0.922	0.871	0.927	1.092	1.124	1.072	1.209	0.0014332
UPI000013A02A	UPF0231 protein YacL	--	13.941	34.2	3	3	5	1.026	1.071	1.014	0.991	0.941	1.014	0.947	0.119007
UPI000174CF83	Uncharacterized HTH-type transcriptional regulator ygbI	--	27.434	35.7	9	9	16	1.134	1.012	0.991	0.996	0.965	0.935	0.923	0.160842
UPI00005F1743	Hydrogenase expression/formation protein HypE	--	35.092	28.6	8	8	14	1.016	0.982	1.032	0.993	0.984	1.009	0.985	0.427323
UPI000013A2B6	Inner membrane protein ybaL	--	59.423	10.6	5	5	11	1.054	1.025	1.059	0.952	0.941	0.984	0.917	0.00665946
UPI000016555B	Inorganic pyrophosphatase	--	19.703	47.2	11	11	62	0.985	0.994	0.955	1.009	1.052	1.004	1.045	0.0848593
UPI0000168025	Cyn operon transcriptional activator CynR	--	32.96	6.7	2	2	2
UPI000013A6DC	Putative glutamine synthetase	--	53.177	23.9	9	9	15	1.733	1.612	1.726	0.258	0.399	0.212	0.171	0.000670528
UPI00003B25F2	Putative FAD-containing dehydrogenase	--	53.737	2.3	1	1	1
UPI000013AE56	RpoE-regulated lipoprotein	--	20.897	16.8	2	2	5	0.961	0.878	1.001	1.18	1.035	0.974	1.123	0.171423
UPI000016817A	Biosynthetic arginine decarboxylase	--	73.898	33.3	20	20	64	1.088	1.059	1.054	0.927	0.956	0.931	0.879	0.00073331
UPI000012EBCD	Transcriptional repressor of multiple antibiotic resistance	--	16.065	15.3	2	2	3
UPI0000F0BDDF	Succinate dehydrogenase cytochrome b556 subunit	--	14.948	21.6	2	2	5	1.146	1.144	1.066	0.966	0.682	1.007	0.791	0.119667
UPI000013B275	Ribosomal RNA large subunit methyltransferase J	--	31.941	40.4	9	9	22	1.019	1.059	1.024	0.99	0.928	0.979	0.934	0.0423885
UPI0000EAE00D	Putrescine aminotransferase	--	49.661	32	14	14	39	1.256	1.285	1.276	0.738	0.752	0.702	0.574	1.36576e-05
UPI000012DFE8	Probable RNA 2'-phosphotransferase	--	20.529	13.6	2	2	3	1.053	0.86	1.094	0.991	1.042	0.972	0.999	0.957958
UPI0000133193	dTDP-4-dehydrorhamnose reductase	--	32.694	39.1	8	8	23	0.982	1.118	1.061	0.919	0.954	0.956	0.895	0.0510122
UPI000013AE55	Porphyrinogen peroxidase	--	33.052	44.1	13	13	32	0.958	0.987	0.913	1.002	1.051	1.049	1.085	0.0405973
UPI00005F188D	dTDP-fucosamine acetyltransferase	--	24.22	9.8	2	2	3	0.978	1.045	0.96	1	0.975	1.055	1.016	0.673197
UPI0000168079	Phosphate acyltransferase	--	37.1	20.5	5	5	7	0.942	0.96	1.078	1.033	0.962	1.027	1.014	0.765902
UPI000013A38B	Phosphatase YbjI	--	30.196	23.6	6	6	17	1.082	1.074	1.058	0.919	0.937	0.942	0.871	0.00015684
UPI000013AE65	Nudix hydrolase domain-containing protein	--	21.748	12	2	2	4	1.036	1.227	1.086	0.754	0.9	1.023	0.799	0.0875825
UPI000013BB41	Murein L,D-transpeptidase	--	36.082	31.7	8	8	24	0.889	0.93	0.947	1.068	1.01	1.108	1.152	0.0127
UPI000016EFA6	Tat proofreading chaperone DmsD	--	23.344	29.9	6	6	9	0.952	0.904	0.968	1.134	1.02	1.048	1.134	0.0298884
UPI000003EAD4	Nickel/cobalt efflux system	--	30.419	3.3	1	1	1	0.893	0.911	1.019	1.105	1.042	1.039	1.129	0.0555431
UPI000012967F	DNA ligase	--	73.605	36.2	20	20	42	0.983	1.004	1.043	0.976	0.993	0.954	0.965	0.161402
UPI00001B510E	DUF465 domain-containing protein	--	8.8782	66.2	7	7	23	0.954	0.934	0.907	1.033	1.106	1.083	1.153	0.00470642
UPI000012C3B9	Acid stress chaperone HdeB	--	12.043	50	4	4	87	0.932	0.919	0.935	1.038	1.023	1.132	1.146	0.0134287
UPI000012F4A5	ABC transporter, substrate-binding protein, family 5	--	59.899	34.5	14	14	36	1.095	1.101	1.041	0.897	0.908	0.94	0.848	0.00191122
UPI000013A6B7	Predicted hydrolase	--	14.23	46.2	6	6	9	1.039	0.936	0.968	1.005	0.955	1.081	1.033	0.531063
UPI000013C474	Zinc resistance-associated protein	--	15.199	53.9	6	6	22	0.61	0.673	0.796	1.3	1.167	1.429	1.874	0.00291514
UPI00000D0991	YccS/YhfK family integral membrane protein	--	79.498	16.8	8	8	8	0.984	1.04	1.002	1.05	1.009	0.96	0.998	0.933467
UPI0000111F90	D-aminoacyl-tRNA deacylase	--	15.95	20	3	3	6	0.961	0.996	0.994	1.028	1.015	1.033	1.042	0.0308877
UPI000013B239	Putative inner membrane protein	--	64.637	1.9	1	1	1	1.066	0.995	1.046	1.066	0.931	0.905	0.934	0.266223
UPI000013B22B	Predicted DNA-binding transcriptional regulator	--	27.82	42.8	9	9	11	1.055	1.005	1.046	0.95	0.985	1	0.945	0.0567539
UPI00001337B1	Lipopolysaccharide core biosynthesis protein rfaG	--	42.284	11.2	4	4	6	1.075	0.87	1.05	0.974	0.982	0.994	0.985	0.880221
UPI0000168009	Lipid-A-disaccharide synthase	--	42.382	22.8	6	6	9	1.078	0.976	1.031	1.08	0.912	0.948	0.953	0.442372
UPI00001B5121	NADH-quinone oxidoreductase	--	100.3	51.3	37	37	114	0.978	0.975	0.999	1.027	1.02	0.997	1.031	0.0598388
UPI0000047C8C	Fused predicted transporter subunits of ABC superfamily: ATP-binding components	--	62.442	64.3	35	35	110	1.016	1.001	1.038	0.989	0.982	0.986	0.968	0.0388703
UPI000012DDCF	Alpha-ketoglutarate permease	--	47.052	4.4	2	2	3	1.182	1.11	1.217	0.903	0.844	0.759	0.714	0.00413545
UPI000013A6C0	YCII domain-containing protein	--	10.602	19.4	2	2	8	0.98	0.99	1.024	0.988	1.05	1.022	1.022	0.381329
UPI000012FD07	N-acetylglucosamine repressor	--	44.541	45.8	15	15	26	0.999	1.042	1.007	1.024	0.947	0.978	0.968	0.270335
UPI000013B9B1	Pseudouridine synthase	--	24.88	15.2	3	3	4	1.031	1.04	1.037	0.93	0.897	1.08	0.935	0.285158
UPI000002C264	4-aminobutyrate aminotransferase, PLP-dependent	--	45.774	57	21	21	73	1.274	1.287	1.32	0.699	0.704	0.681	0.537	1.81714e-06
UPI000012BE0B	Arabinose 5-phosphate isomerase	--	34.031	38.9	12	12	21	0.9	0.964	0.918	1.06	1.109	1.053	1.158	0.00489944
UPI00001260BD	Arginine transporter subunit periplasmic-binding component of ABC superfamily	--	26.929	67.5	17	17	69	0.982	1.028	0.988	0.935	1.016	1.048	1	0.98762
UPI000013ABC8	YebO domain containing protein	--	10.792	10.5	1	1	1
UPI000013AE51	N-acetylmuramic acid-specific PTS system EIIBC component	--	49.801	10.3	3	3	7	1.073	1.015	1.041	0.984	0.879	0.943	0.897	0.0400113
UPI0000137980	4-hydroxybenzoate octaprenyltransferase	--	32.511	4.1	1	1	2	0.992	1.093	1	0.964	0.928	1.04	0.95	0.326614
UPI000012B8C4	GnsA/GnsB family protein	--	6.5755	54.4	4	4	10	0.933	0.938	0.924	1.036	1.064	1.071	1.135	0.000338728
UPI00001639E6	Glycine cleavage system transcriptional repressor	--	20.768	16.3	2	2	6	0.95	0.944	0.648	0.907	1.29	0.888	1.214	0.33075
UPI0000134576	RNA polymerase sigma-54 factor	--	53.989	24.3	9	9	16	1.017	1.04	0.976	1.009	0.958	1.026	0.987	0.655904
UPI000013A2CF	Paral putative thioredoxin protein	--	31.791	56.3	11	11	23	0.944	1.02	1.031	0.913	1.027	0.995	0.98	0.668089
UPI000013A9E2	EAL domain-containing protein	--	27.046	11.8	3	3	5	1.054	1.096	0.965	0.948	0.99	0.991	0.94	0.209265
UPI00003B25F4	Accessory colonization factor AcfD	--	167.24	19.1	25	25	39	0.907	0.912	0.929	1.09	1.096	1.084	1.19	2.53564e-05
UPI000012589D	Allantoate amidohydrolase	--	45.693	54	18	18	36	1.232	1.271	1.191	0.731	0.745	0.79	0.613	8.26503e-05
UPI0000137353	Cytoplasmic trehalase	--	63.696	12.9	7	7	9	1.132	1.098	1.178	0.893	0.857	0.893	0.776	0.000492705
UPI000012F00D	HTH-type transcriptional regulator MetR	--	35.629	9.8	2	2	2	0.749	0.944	0.983	1.024	1.123	1.193	1.248	0.0767979
UPI00001312D1	2-dehydropantoate 2-reductase	--	33.87	15.8	4	4	4	0.972	0.928	1.054	1.047	1.075	0.935	1.035	0.582617
UPI000012C5C6	Heme biosynthesis protein HemY	--	45.244	34.9	11	11	31	1.024	1.026	1.023	1.007	0.965	0.964	0.955	0.0335066
UPI000016395C	Peptidyl-prolyl cis-trans isomerase	--	16.081	18.1	2	2	5	1.05	1.088	1.116	0.893	0.963	0.956	0.864	0.00803199
UPI0000131F9D	Putrescine-binding periplasmic protein	--	40.839	28.6	8	8	20	1.289	1.248	1.204	0.732	0.759	0.816	0.617	0.000208262
UPI0000165473	HTH-type transcriptional repressor PurR	--	38.174	50.1	13	13	25	1.028	0.974	0.985	1.013	1.03	1.002	1.019	0.347703
UPI000016F47A	ECA polysaccharide chain length modulation protein	--	39.489	45.1	14	14	37	1.039	1.028	1.044	0.989	0.928	0.927	0.914	0.0146062
UPI00001329A5	AgaV	--	17.086	18.5	3	3	7	0.946	0.922	0.912	1.076	1.008	1.076	1.137	0.00627758
UPI000013B241	Fe/S biogenesis protein NfuA	--	20.997	52.9	7	7	40	0.949	1	0.95	1.043	1.014	1.063	1.076	0.0289366
UPI00001117A0	Fumarate hydratase class II	--	50.488	39.2	16	16	42	0.791	0.826	0.798	1.185	1.216	1.199	1.491	1.2387e-05
UPI0000168186	Putative Ni/Fe-hydrogenase 2 b-type cytochrome subunit	--	43.602	4.8	3	3	4	0.875	0.906	0.87	1.126	1.042	1.081	1.226	0.00139314
UPI000012A600	Formate dehydrogenase iron-sulfur subunit	--	33.1	51.7	16	13	50	1.078	1.034	1.073	0.962	0.938	0.909	0.882	0.00393881
UPI000013A673	High frequency lysogenization protein HflD	--	22.947	12.7	2	2	3	1.017	0.921	1.046	0.998	1.018	1.011	1.014	0.707276
UPI000012CCD8	Chaperone protein HscA	--	65.652	39.8	17	17	33	0.994	0.966	0.976	1.008	1.034	1.041	1.05	0.0192738
UPI0000165533	Protein ViaA	--	55.907	6.8	4	4	4	1.03	0.941	1.062	0.986	0.994	0.964	0.971	0.488212
UPI00001341E9	50S ribosomal protein L9	--	15.769	78.5	12	12	76	1.028	1.026	0.984	0.962	0.973	1.009	0.969	0.195719
UPI000003EB27	DNA-directed RNA polymerase subunit omega	--	10.236	62.6	7	7	31	1.039	1.028	0.972	0.952	0.991	1.007	0.971	0.328189
UPI00076423D9	UPF0257 lipoprotein YnfC	--	27.803	11.7	1	1	1	1.235	1.118	1.176	1.049	0.669	0.759	0.702	0.0534259
UPI0000000F69	Bifunctional polymyxin resistance protein ArnA	--	74.288	38.3	25	25	52	1.158	1.148	1.196	0.837	0.812	0.841	0.711	3.32848e-05
UPI000003EB1D	Phosphate-binding protein PstS	--	37.023	63.6	20	20	41	0.846	0.902	0.852	1.099	1.126	1.145	1.296	0.000382894
UPI0000112BC1	Probable endonuclease 4	--	31.479	30.2	6	6	14	1.074	1.034	1.014	0.946	0.948	0.973	0.918	0.0113434
UPI000003CA87	Multifunctional fusion protein	--	49.361	23	10	10	12	1.244	1.216	1.154	0.779	0.782	0.784	0.649	4.19113e-05
UPI0000110B1A	Phosphoribosylglycinamide formyltransferase	--	23.238	9.4	2	2	5	1.03	1.028	0.983	1.048	0.912	1.008	0.976	0.590611
UPI00001256FB	Glucose-1-phosphatase	--	45.682	62.5	21	21	75	0.934	0.978	0.985	1.024	1.004	1.066	1.068	0.0535033
UPI000013A2FC	Ribosomal silencing factor RsfS	--	11.582	55.2	5	5	17	1.038	1.09	1.104	0.889	0.954	0.951	0.864	0.0079996
UPI000013ABF4	Putative membrane protein	--	44.428	6.5	2	2	2	0.998	1.126	1.221	0.977	0.727	0.967	0.799	0.111226
UPI0000134276	Endolytic peptidoglycan transglycosylase RlpA	--	37.528	31.2	10	10	21	0.95	0.928	0.866	1.12	1.108	0.982	1.17	0.0366694
UPI000012A29A	Ethanolamine utilization protein eutN	--	9.9564	8.4	1	1	1
UPI00001260C1	Arginine transporter subunit	--	24.913	7.7	1	1	3	1.083	0.861	1.121	1.052	0.857	1.03	0.959	0.727012
UPI000003EAF6	ATP synthase subunit b	--	17.264	51.9	10	10	36	1.038	1.001	1.023	1.019	0.962	0.93	0.951	0.148999
UPI000003EAFD	Respiratory nitrate reductase 2 delta chain	--	26.16	20.3	3	3	4	1.454	1.28	1.222	0.782	0.686	0.594	0.521	0.00230972
UPI000003EAFE	Nitrate reductase	--	58.557	41.8	18	11	44	1.288	1.279	1.304	0.73	0.723	0.666	0.547	3.44626e-05
UPI000003EAC5	30S ribosomal protein S5	--	17.603	82	13	13	158	0.996	1.027	1.02	0.991	0.988	1.002	0.98	0.115266
UPI000012C7C3	1-(5-phosphoribosyl)-5-[(5-phosphoribosylamino)methylideneamino] imidazole-4-carboxamide isomerase	--	26.032	44.9	9	9	19	0.986	0.984	1.019	0.994	0.981	1.02	1.002	0.907039
UPI000003EB6F	30S ribosomal protein S13	--	13.099	55.1	8	8	49	0.95	1.025	0.967	1.047	1.027	0.993	1.042	0.204638
UPI000013126F	3-methyl-2-oxobutanoate hydroxymethyltransferase	--	28.237	18.6	4	4	6	0.786	0.886	1.002	1.129	1.182	0.922	1.209	0.142131
UPI0000168038	Copper transporter	--	87.872	25.2	16	16	34	0.957	0.921	0.933	1.078	1.073	1.004	1.122	0.010844
UPI000013A332	Cell division coordinator CpoB	--	28.231	42.2	9	9	21	0.996	1.021	1.005	0.97	0.983	1.044	0.992	0.730653
UPI000013A929	DUF3656 domain-containing protein	--	72.701	19.1	10	10	17	1.061	1.034	1.031	0.873	0.943	0.985	0.896	0.0382706
UPI000013C137	Opacity-associated protein A	--	23.505	35.4	6	6	11	1.021	0.978	1.12	1.038	1.022	0.832	0.927	0.38905
UPI000012F2C4	DNA-binding transcriptional regulator of mntH	--	17.64	22.6	3	3	4	1.154	0.931	1.045	0.98	0.984	0.916	0.92	0.294037
UPI000013B1A7	Pirin-like protein YhaK	--	25.895	16.7	4	4	5	0.907	0.748	0.916	1.088	1.168	1.179	1.336	0.014245
UPI000013559F	Peptide antibiotic transporter SbmA	--	46.459	10.1	3	3	3
UPI000013B0AA	DedA family general envelope maintenance protein YghB	--	24.134	4.1	1	1	2
UPI00005F23FA	Putative cytoplasmic protein	--	7.2662	59.7	5	5	8	0.629	0.685	0.69	1.352	1.256	1.336	1.968	5.50469e-05
UPI0000128D51	Sulfate transporter CysZ	--	29.305	13	3	3	4	1.01	0.944	0.871	1.119	1.049	1.036	1.134	0.0604127
UPI000013A2C0	Thioesterase III	--	15.088	30.3	4	4	8	1.078	1.256	0.933	0.96	0.883	0.876	0.832	0.12254
UPI000013A066	YaeQ family protein	--	20.876	16	3	3	3	0.995	1.18	1.166	0.922	0.914	0.846	0.803	0.0239501
UPI000012C361	Hydroxylamine reductase	--	60.063	4.9	2	2	2
UPI000013AC6C	Putative oxidoreductase	--	54.031	24.8	11	10	19	0.97	0.947	0.965	1.04	1.023	1.043	1.078	0.00138102
UPI000012CE29	Lipid A biosynthesis lauroyltransferase	--	35.406	15	4	4	8	1.034	0.962	0.991	1.048	1.088	0.982	1.044	0.309783
UPI0000110321	Glutathione S-transferase	--	22.868	61.7	15	15	54	0.998	1.035	1.018	1.003	0.991	0.995	0.98	0.139519
UPI00001112DC	GTPase Era	--	33.81	24.3	7	7	16	0.966	1.026	1.06	0.991	0.938	1.031	0.97	0.472179
UPI000012A601	Formate dehydrogenase-O, cytochrome b556 subunit	--	24.606	9.5	2	2	7	1.084	1.023	1.028	1.012	0.999	0.885	0.924	0.157885
UPI0000137C33	DNA polymerase V, subunit C	--	47.679	1.7	1	1	1
UPI00001361C8	FeS assembly ATPase SufC	--	27.582	52	13	13	33	0.915	0.985	0.976	1.031	1.068	1.07	1.102	0.020389
UPI00001654F8	Ribosome-binding factor A	--	15.154	37.6	5	5	15	1.012	1.043	1.04	0.994	0.969	0.987	0.953	0.017333
UPI00001681EC	Ketol-acid reductoisomerase (NADP(+))	--	54.068	39.3	20	20	35	0.778	0.766	0.8	1.198	1.239	1.193	1.549	1.50706e-05
UPI0000030AA0	Predicted kinase inhibitor	--	17.085	44.9	5	5	20	0.969	1.002	1.021	0.944	1.016	1.025	0.998	0.931074
UPI0000165537	Peptidylprolyl isomerase	--	10.232	83.9	8	7	13	0.987	1.049	1.01	0.924	0.968	1.039	0.962	0.364116
UPI000016818C	tRNA N6-adenosine threonylcarbamoyltransferase	--	36.008	35.9	11	11	18	1.037	1.036	1.039	0.952	0.954	0.948	0.917	1.84695e-06
UPI000013B7EF	EAL domain protein	--	58.72	11.8	6	6	8	1.136	0.917	1.058	1.028	0.953	0.914	0.931	0.389274
UPI000013A36F	Ribosomal RNA large subunit methyltransferase F	--	34.226	31.8	7	7	8	1.173	0.891	1.028	0.981	0.86	1.108	0.954	0.689475
UPI0000165534	D-ribose pyranase	--	15.292	33.1	4	4	10	0.966	0.944	0.976	1.039	1.014	1.116	1.098	0.037935
UPI000013BC97	Phosphotransferase RcsD	--	100.37	18.2	16	16	22	0.994	0.968	0.972	1.03	1.021	0.994	1.038	0.0515407
UPI0000168207	Bifunctional aspartokinase/homoserine dehydrogenase	--	88.887	30	20	20	33	0.962	0.96	1.002	1.007	1.018	1.037	1.047	0.0475486
UPI000012ACE3	FtsK	--	146.66	15.2	18	18	26	1.034	1.038	1.01	0.988	0.991	1.014	0.971	0.0686636
UPI000012A3CD	Fructose-1,6-bisphosphatase class 1	--	36.833	48.5	15	15	50	1.065	1.048	1.058	0.956	0.929	0.932	0.888	0.000313558
UPI000012CFE2	Formate hydrogenlyase subunit E	--	64.98	2.8	1	1	1	1.023	0.94	0.899	1.069	0.957	1.118	1.099	0.193456
UPI000012EDA2	Methyl-accepting chemotaxis aspartate transducer	--	59.442	31.2	14	12	18	1.555	1.494	1.502	0.508	0.513	0.439	0.321	2.55112e-05
UPI000013BB64	Carboxymuconolactone decarboxylase family protein	--	20.533	16.5	3	3	3	0.982	0.999	1.022	1.034	0.995	0.98	1.002	0.928818
UPI000013BF93	Ribosomal RNA small subunit methyltransferase I	--	31.348	53.8	11	11	16	1.039	1.115	1.032	0.913	0.949	0.972	0.89	0.0191043
UPI000013B3DC	Putative lipoprotein	--	7.1771	50.7	3	3	4	1.078	0.654	0.808	1.199	1.148	1.108	1.36	0.0887335
UPI000013A6B0	UPF0225 protein YchJ	--	16.99	54.6	7	5	12	0.925	1.035	1.008	0.988	0.935	0.994	0.983	0.693587
UPI000012F38A	ABC transporter, ATP-binding protein	--	54.535	14.9	7	7	11	0.905	0.885	0.963	1.089	1.123	1.089	1.199	0.00261485
UPI0000047611	Major type 1 subunit fimbrin (Pilin)	--	18.111	24.2	2	2	16	0.859	1.057	0.846	1.001	1.123	1.088	1.163	0.123223
UPI000012FF2E	Alkene reductase	--	39.516	51.5	14	14	29	0.996	1.01	0.979	0.998	1.004	1.018	1.012	0.337919
UPI0000043B85	Exodeoxyribonuclease III	--	30.969	46.6	12	12	33	1.072	1.066	1.055	0.925	0.969	0.9	0.875	0.00371965
UPI000013B381	Glutathione S-transferase, C-terminal domain protein	--	22.545	27.2	5	5	11	1.16	1.159	1.199	0.82	0.827	0.86	0.713	5.15131e-05
UPI000013A5B5	Ribosomal RNA large subunit methyltransferase K/L	--	78.853	31.8	21	21	35	1.022	1.005	1.032	0.982	0.99	1.007	0.974	0.0687496
UPI00001120EC	Shikimate kinase 1	--	19.538	64.7	11	11	37	1.018	1.04	1.039	0.927	0.974	1.015	0.942	0.0882825
UPI0000125CB1	Cytochrome bd-II oxidase subunit I	--	57.919	15.8	5	5	8	0.895	0.804	0.82	1.241	1.134	1.188	1.414	0.00116841
UPI000013A6CA	Modulator of Rnase II stability	--	74.664	21.5	12	12	13	1.08	1.049	1.13	0.9	0.895	0.918	0.832	0.0013458
UPI0000047C5D	50S ribosomal protein L7/L12	--	12.295	61.2	9	9	55	0.922	0.964	0.986	1.003	1.064	0.992	1.065	0.0984677
UPI00001308FB	RNA pyrophosphohydrolase	--	20.795	22.2	4	4	5	1.049	0.927	0.957	1.145	0.983	0.94	1.046	0.575731
UPI000013747B	tRNA-specific 2-thiouridylase MnmA	--	40.959	38	11	11	19	0.972	1.021	0.963	1.061	0.966	1.003	1.025	0.499023
UPI00001260BF	ABC transporter arginine-binding protein 1	--	26.829	49	9	9	21	1.07	1.082	1.024	0.86	0.972	0.965	0.881	0.04076
UPI000013BF0A	UPF0114 protein YqhA	--	18.641	10.4	2	2	4	0.964	0.993	1.111	1.058	0.942	0.871	0.936	0.395232
UPI000013A5A5	APH domain-containing protein	--	34.487	35.4	10	10	15	0.953	0.959	0.943	0.974	1.007	1.03	1.055	0.0354489
UPI00005EF2BD	Soluble pyridine nucleotide transhydrogenase	--	51.56	69.7	23	23	99	0.98	0.994	0.984	0.998	1.018	1.028	1.029	0.0417692
UPI0000168229	Primosomal replication protein N	--	11.442	25	2	2	4	1.178	1.012	0.978	0.793	1.123	0.918	0.895	0.365156
UPI000016825D	UPF0597 protein YhaM	--	45.361	8.7	4	4	4	1.133	1.09	1.135	0.905	0.787	0.952	0.787	0.0143394
UPI000012F39A	Molybdopterin biosynthesis protein Mog	--	21.222	31.3	7	7	15	0.979	1.072	0.917	0.968	1.094	1.036	1.044	0.489606
UPI000016550C	Glucose-1-phosphate adenylyltransferase	--	48.697	49	18	18	55	1.027	1.006	1.011	1.011	0.986	1.005	0.986	0.228292
UPI000012D90E	Geranyltranstransferase	--	32.159	22.4	7	7	12	0.981	0.966	0.983	1.027	1.026	0.974	1.033	0.153186
UPI000011DD2B	Riboflavin biosynthesis protein RibD	--	40.338	59.9	17	17	30	0.964	0.961	1	1.011	1.013	1.07	1.058	0.0680194
UPI000013BF21	Inner membrane protein yqiK	--	60.699	2.5	2	2	2	0.962	0.836	0.822	1.188	1.056	1.136	1.29	0.013364
UPI000013BAEA	Lipoprotein	--	6.8401	60.7	4	4	7	0.983	1.028	0.987	1.099	1.006	0.957	1.021	0.670212
UPI00001639FA	CTP synthase	--	60.373	49	27	27	94	1.019	0.973	0.985	1.01	1.01	1.007	1.017	0.29075
UPI00000480D3	MdaB	--	21.891	39.9	7	7	11	0.851	0.82	0.87	1.134	1.189	1.16	1.371	0.000138165
UPI000003EB18	Phosphatidylglycerol--prolipoprotein diacylglyceryl transferase	--	33.108	8.6	2	2	4	1.024	0.967	1.105	1.068	0.883	0.961	0.941	0.403085
UPI0000125D8C	Response regulator receiver domain-containing protein	--	27.292	54.2	14	14	82	1.007	1.018	0.97	0.996	1.016	1.007	1.008	0.631006
UPI000013A58E	Putative NAD(P)H-dependent oxidoreductase	--	23.036	9.2	3	3	4	0.924	1.003	1.016	1.013	0.931	1.065	1.022	0.684519
UPI000013B044	Glycerol-3-phosphate responsive antiterminator	--	20.786	13.6	3	3	4	1.076	1.099	1.084	0.835	0.938	0.99	0.848	0.0296508
UPI000012AC73	Predicted fosmidomycin efflux system	--	43.305	6.7	2	2	3	0.623	0.866	1.037	1.181	0.997	1.305	1.379	0.116463
UPI00001370A2	Low affinity tryptophan permease	--	45.21	3.4	1	1	4	1.247	1.194	1.139	0.853	0.826	0.781	0.687	0.000516912
UPI00000480B9	Acetate kinase	--	43.29	60.5	16	16	87	0.981	0.987	0.978	1.01	1.033	1.002	1.034	0.0256699
UPI00001344B1	Ribonuclease R	--	92.108	45.6	33	33	71	1.028	0.981	0.989	1.023	1.013	0.965	1.001	0.971262
UPI0000132B86	Sodium/proline symporter	--	54.344	16.5	8	8	21	1.301	1.268	1.277	0.76	0.688	0.8	0.585	0.000277066
UPI0001B88F43	Glucosamine-6-phosphate deaminase	--	25.885	3.4	1	1	1	1.064	1.076	0.994	0.875	1.021	0.987	0.92	0.183704
UPI000013B080	Putative Fe-S subunit oxidoreductase subunit	--	115.58	34.5	32	32	47	1.048	1.11	1.118	0.892	0.848	0.93	0.815	0.00367309
UPI000013A681	UPF0227 protein YcfP	--	21.226	65.6	9	9	33	0.963	0.972	0.942	1.019	1.048	1.052	1.084	0.00413232
UPI000013BFA8	STAS domain-containing protein	--	10.68	23.7	2	2	4	0.989	1.026	0.997	1.033	1.013	0.985	1.006	0.743529
UPI00001293CE	Qin prophage predicted regulator for DicB	--	15.656	5.2	1	1	1
UPI000003EAF4	ATP synthase subunit alpha	--	55.221	64.9	29	29	218	1.027	1.049	1.013	0.972	0.987	0.975	0.95	0.0100574
UPI000003EB28	Bifunctional (P)ppGpp synthetase II/guanosine-3',5'-bis pyrophosphate 3'-pyrophosphohydrolase	--	79.342	32.6	20	20	33	1.012	1.008	1.04	1.018	0.935	0.958	0.951	0.136414
UPI000012FCC5	NH(3)-dependent NAD(+) synthetase	--	30.636	61.5	17	17	39	1.04	1.084	0.997	0.951	0.974	0.958	0.924	0.0351532
UPI000002DB2D	Acetyltransferase	--	29.316	52	9	9	20	0.883	0.978	0.964	1.062	1.072	1.051	1.127	0.0203369
UPI00000035D8	Dihydropteroate synthase	--	30.615	42.2	10	10	25	1.035	1.07	1.051	0.958	0.945	0.958	0.907	0.000768648
UPI00000350B5	4-hydroxy-3-methylbut-2-en-1-yl diphosphate synthase (flavodoxin)	--	40.683	66.1	22	22	51	0.995	0.994	0.97	1.004	1.012	1.027	1.028	0.0580151
UPI000003EAE0	50S ribosomal protein L16	--	15.281	39.7	4	4	37	0.968	0.993	1.044	1.031	0.978	0.986	0.997	0.915748
UPI000003EB33	Alpha-2-macroglobulin	--	181.58	36.4	49	49	80	1.056	1.046	1.051	0.947	0.949	0.913	0.891	0.000843402
UPI000013A36A	Predicted DNA-binding transcriptional regulator	--	25.016	15.7	3	3	4	1.108	1.06	1.015	0.876	0.952	1.006	0.89	0.0693581
UPI000012FD70	Ferredoxin-type protein essential for electron transfer from ubiquinol to periplasmic nitrate reductase (NapAB)	--	24.924	6.1	1	1	1	1.056	1.049	0.842	1.046	1.003	1.011	1.038	0.600701
UPI0000132AD6	Bifunctional purine biosynthesis protein PurH	--	57.329	50.7	24	24	59	0.974	0.955	0.958	1.003	1.039	1.023	1.062	0.0073614
UPI000013B3C7	Putative adenine permease PurP	--	46.865	3.1	2	2	2	0.866	0.938	1.172	1.129	1.175	0.733	1.02	0.969982
UPI000013BB1B	Aldehyde dehydrogenase-like protein yneI	--	49.717	24.9	11	11	14	1.034	1.022	0.949	1.046	0.997	1	1.013	0.695818
UPI000013B82F	Putative transferase	--	23.713	35.1	8	8	13	0.998	1.06	1.08	0.933	1.007	0.915	0.91	0.065776
UPI000012D0B0	Isoaspartyl dipeptidase	--	41.083	55.9	17	17	36	1.006	1.027	0.989	0.971	0.993	1.043	0.995	0.834329
UPI0000165542	Glycerol kinase	--	56.23	64.9	32	32	205	0.969	0.956	0.956	1.039	1.044	1.034	1.082	0.000118652
UPI000013B386	tRNA (cytidine(34)-2'-O)-methyltransferase	--	17.726	28.7	4	4	6	1.046	1.007	0.989	0.989	0.999	1.024	0.99	0.64319
UPI0000134519	DNA-binding transcriptional activator	--	33.144	20.1	6	6	10	0.958	1.02	1.052	0.982	1.01	0.964	0.976	0.47525
UPI0001505B88	NADH-quinone oxidoreductase subunit C/D	--	68.235	62.9	32	32	128	1.009	0.984	1.022	1.017	1.003	0.986	0.997	0.846651
UPI0000136A7F	Thiamin/thiamine pyrophosphate ABC transporter, thiamin/thiamine pyrophospate-binding protein	--	36.163	49.2	14	14	33	0.978	1.009	0.97	0.966	1.018	1.074	1.034	0.374843
UPI00001351EC	Anti-sigma-E factor RseA	--	24.321	50	6	6	11	0.97	1.052	1.016	1.018	0.977	0.976	0.978	0.466514
UPI00001272E1	Cytochrome c-type biogenesis protein CcmE	--	17.698	36.5	6	6	14	0.952	0.945	1.05	1.106	1.058	0.969	1.063	0.303537
UPI000013B0C8	Quinol monooxygenase YgiN	--	11.532	30.8	4	4	12	0.931	0.932	0.845	1.033	1.124	1.18	1.232	0.0146846
UPI0000130D16	Omptin family outer membrane protease OmpT	--	35.562	25.2	7	7	7	0.96	0.851	0.791	1.236	1.196	0.998	1.318	0.0343619
UPI00001359CD	Phosphohistidine phosphatase	--	17.208	19.9	2	2	2	1.019	0.99	1.457	1.266	0.705	0.569	0.733	0.258832
UPI000016552C	DNA gyrase subunit B	--	89.949	60.3	39	39	114	1.03	1	1.011	1.002	0.977	0.994	0.978	0.118577
UPI000013ABB2	HTH-type transcriptional regulator DmlR	--	34.63	11.7	3	3	3	0.992	1.01	1.218	0.962	0.92	0.916	0.869	0.113399
UPI000013B270	Dipeptide and tripeptide permease B	--	53.575	8	4	4	9	1.04	0.995	1.042	0.965	1.014	0.943	0.95	0.118451
UPI000013BB52	YniB-like family protein	--	20.367	15.7	3	3	4	0.966	0.891	1.111	1.104	1.045	0.892	1.025	0.800835
UPI000012EDA3	Methyl-accepting chemotaxis protein II	--	59.943	24.8	10	8	14	1.497	1.522	1.542	0.529	0.527	0.572	0.357	3.27109e-06
UPI000012FCF9	Probable nadAB transcriptional regulator	--	47.345	28	10	10	14	0.98	0.986	1.026	0.989	1.046	0.974	1.006	0.845682
UPI000013B26E	Pyridine nucleotide-disulfide oxidoreductase family protein	--	43.741	21.8	8	8	9	1.002	0.999	0.953	0.996	1.001	0.999	1.014	0.427583
UPI000018F82A	PNPLA domain-containing protein	--	33.067	15	4	4	4	0.856	1.14	1.146	0.906	0.979	0.998	0.918	0.482738
UPI00001259DF	N-acetylmuramoyl-L-alanine amidase	--	20.536	32.8	6	6	17	1.102	1.064	0.977	0.93	0.917	0.99	0.903	0.0762791
UPI000012B7E1	Glutaminase	--	32.903	31.9	7	7	23	0.913	0.952	0.823	1.094	1.158	1.084	1.241	0.010552
UPI000013AC20	UPF0265 protein YeeX	--	12.778	59.6	8	8	22	1.007	0.998	0.953	1.014	1.037	1.058	1.051	0.0764261
UPI0000130223	Lipoprotein NlpI	--	33.62	21.1	4	4	6	1.039	0.831	0.977	1.178	0.99	1.066	1.136	0.196592
UPI000013B081	Putative selenate reductase, FAD-binding subunit	--	28.649	22.8	4	4	5	1.092	1.223	1.082	0.823	0.773	1.003	0.765	0.0361303
UPI000013BDCC	DUF1176 domain-containing protein	--	38.746	3.2	1	1	1	0.898	1.11	1.245	0.759	1.014	1.005	0.854	0.307648
UPI00050951E9	Mannitol repressor protein	--	22.121	7.7	1	1	1
UPI0000047C7F	Ion-translocating oxidoreductase complex subunit G	--	21.912	32	6	6	11	0.976	1.082	0.907	1.072	0.994	1.008	1.037	0.53399
UPI000003EAE3	30S ribosomal protein S19	--	10.43	48.9	6	6	20	0.939	1.006	0.966	1.031	1.031	0.996	1.05	0.0983729
UPI0000047C59	Elongation factor G	--	77.58	54.4	33	33	265	1.033	1.002	1.008	0.987	0.997	0.98	0.974	0.0680705
UPI00001127A5	Succinate dehydrogenase flavoprotein subunit	--	64.421	60.4	27	27	138	0.992	0.977	0.986	1.014	1.023	1.02	1.035	0.00271281
UPI00001639F3	SsrA-binding protein	--	18.269	25	4	4	5	0.998	0.982	0.98	1.086	1.01	1.015	1.051	0.110585
UPI000013021E	Murein hydrolase activator NlpD	--	40.149	23.2	8	8	27	0.951	0.872	0.962	1.14	1.049	0.965	1.132	0.0979633
UPI000013A2EC	Putative membrane protein putative channel	--	46.602	17.1	8	8	14	0.998	1.02	1.062	0.969	0.964	1.025	0.96	0.20533
UPI000012EEF7	Isochorismate synthase MenF	--	48.764	32.7	11	11	17	1.002	1.006	0.988	0.978	0.992	0.992	0.989	0.190355
UPI0000125139	HTH-type transcriptional regulator AbgR	--	34.058	7.9	3	3	3	0.946	1.061	0.958	1.086	0.942	1.015	1.026	0.664714
UPI0000135555	Peptide transport system, ATP-binding protein SapF	--	30.57	29.1	6	6	11	0.959	0.961	0.981	1.071	1.015	1.029	1.074	0.0158922
UPI000013B55B	Predicted mechanosensitive channel	--	123.97	15.4	15	15	21	1.053	0.976	1.032	1.027	1.013	0.982	0.987	0.6597
UPI000013A2D3	HTH-type transcriptional activator AllS	--	34.511	7.1	2	2	2
UPI0000130034	N-hydroxyarylamine O-acetyltransferase	--	32.274	25.3	5	5	7	1.017	1.032	1.021	0.91	1.068	1.084	0.997	0.924495
UPI000013B567	23S rRNA (guanosine-2'-O-)-methyltransferase RlmB	--	26.556	35.4	8	8	29	0.986	1.047	1.039	0.941	1.011	0.972	0.952	0.152535
UPI0000138EEE	TDP-N-acetylfucosamine:lipid II N-acetylfucosaminyltransferase	--	40.639	19.2	6	6	8	1.002	0.992	0.972	0.965	1.049	1.027	1.025	0.410332
UPI00001653E1	Leucine responsive regulatory protein	--	18.887	58.5	11	11	35	1.058	1.095	1.057	0.915	0.929	0.96	0.874	0.00179353
UPI000013B582	DUF386 domain-containing protein	--	16.865	60	7	7	11	1.001	0.935	0.829	1.073	1.149	1.09	1.198	0.0358714
UPI0000683E8B	Transport channel	--	53.74	73.6	24	24	69	0.98	0.955	0.97	1.183	0.973	0.931	1.063	0.496377
UPI000013B416	Ferrous-iron efflux pump FieF	--	32.927	14	3	3	4	1.027	1.078	1.068	0.886	0.962	1	0.898	0.0476956
UPI0000110D0E	3-isopropylmalate dehydrogenase	--	39.517	20.1	6	6	7	0.962	1.136	1.089	0.962	0.851	1.008	0.885	0.160636
UPI0000128FF8	Ornithine decarboxylase SpeF	--	82.415	23.2	12	11	18	0.529	0.676	0.569	1.406	1.251	1.524	2.357	0.000748676
UPI000011323C	Aminodeoxychorismate synthase component 1	--	50.969	21.6	7	7	8	0.986	0.948	1.009	0.989	1.002	1.032	1.027	0.289625
UPI000012A73E	Ferrichrome-iron receptor	--	82.181	25.6	17	17	20	1.003	0.992	0.955	1.139	1.084	0.866	1.047	0.669723
UPI000013A590	Amino acid permease	--	52.496	7.1	4	4	4	1.095	1.112	1.066	0.972	0.921	0.848	0.837	0.0126251
UPI000012C820	Imidazole glycerol phosphate synthase subunit HisF	--	28.454	53.9	10	10	23	0.964	0.986	0.958	1.026	1.011	1.063	1.066	0.0209314
UPI000013B419	PF04175 family protein	--	10.776	38.4	4	4	24	0.943	0.937	0.852	1.001	1.119	1.146	1.195	0.0284973
UPI0001EB6B01	DUF2511 domain-containing protein	--	12.247	15.2	2	2	4	0.95	0.966	0.955	1.044	0.998	0.997	1.059	0.0238457
UPI000013BC56	DEAD/DEAH box helicase	--	70.377	7.4	5	5	5	1.082	1.069	1.221	0.844	1.052	0.914	0.833	0.0748074
UPI0000128EF7	DNA-binding protein HU-beta	--	9.2255	62.2	5	4	24	1.028	1.036	0.966	0.942	1	1.015	0.976	0.485223
UPI0000129FCA	2,3-dihydro-2,3-dihydroxybenzoate dehydrogenase	--	26.249	9.3	2	2	2	0.955	0.926	1.095	0.972	0.973	1.092	1.02	0.755552
UPI000013AC65	PfkB carbohydrate kinase family protein	--	39.71	2.8	1	1	1
UPI000013A347	Phosphatase YbhA	--	30.201	15.1	4	4	5	1.057	1.113	0.954	0.972	1.019	0.9	0.925	0.256029
UPI00001311A0	Acyl-CoA hydratase	--	28.404	27.1	5	5	9	1.229	1.184	1.297	0.754	0.746	0.73	0.601	5.50041e-05
UPI0000125634	Putative oxidoreductase Fe-S binding subunit	--	71.843	13.1	7	7	12	1.05	0.975	1	0.932	1.039	1.011	0.986	0.723363
UPI000013A605	Conserved protein	--	19.315	19.1	4	4	11	1.044	1.048	1.039	0.984	0.938	0.977	0.926	0.00695248
UPI0000129BC8	Phosphogluconate dehydratase	--	64.638	12.6	6	6	6	0.929	0.922	0.964	1.108	1.028	1.03	1.125	0.0143114
UPI00005EEDD9	Reactive intermediate/imine deaminase	--	13.611	48.4	5	5	22	0.969	1.032	0.976	1.008	1.052	1.024	1.036	0.204711
UPI000013799B	2-octaprenyl-3-methyl-6-methoxy-1,4-benzoquinol hydroxylase	--	42.953	17.1	5	5	10	1.055	1.057	1.042	0.983	0.931	0.98	0.918	0.00900083
UPI0000136FE8	Glyoxylate/hydroxypyruvate reductase B	--	35.395	24.7	9	9	18	1	1.016	0.983	1.022	0.958	1.018	1	0.977905
UPI000013AC61	Transcriptional regulator, LysR family	--	32.723	25.3	6	6	8	0.987	1.011	1.095	0.9	1.015	1.006	0.944	0.31119
UPI000013BF1A	PF06853 family protein	--	16.548	31.4	3	3	4	0.901	1.101	1.11	0.952	1.087	0.87	0.935	0.514669
UPI0000168221	Fumarate hydratase class I	--	60.105	63.1	28	17	81	0.772	0.76	0.825	1.199	1.162	1.188	1.506	0.00010695
UPI000013A2C3	Putative lipoprotein	--	19.431	6.3	1	1	1
UPI000012D2D5	Translation initiation factor IF-2	--	97.349	45.3	39	39	128	1.004	1.014	0.993	0.999	1	1.001	0.996	0.582753
UPI000003EB7C	Ribose import ATP-binding protein RbsA	--	55.041	34.9	14	14	19	0.92	0.937	0.952	1.043	0.996	1.118	1.124	0.0297392
UPI000012ACFE	ABC transporter, FtsX cell division permease	--	38.543	30.7	10	10	15	0.981	0.926	1.027	0.996	1.036	0.967	1.022	0.567311
UPI0000001701	Transporter, basic amino acid/polyamine antiporter (APA) family	--	46.665	3.8	2	2	3	0.384	0.372	0.402	1.653	1.519	1.652	4.166	2.41963e-06
UPI000005A08B	Translation initiation factor IF-1	--	8.2495	69.4	3	3	18	1.064	1.054	1.013	0.952	0.955	0.997	0.927	0.0237112
UPI0000047C5B	30S ribosomal protein S12	--	13.737	37.1	7	7	16	1.005	1.025	0.975	0.974	1.055	0.796	0.94	0.466202
UPI0000033BED	1-deoxy-D-xylulose-5-phosphate synthase	--	67.616	33.7	19	19	46	1.002	1.004	1.002	1.031	0.97	1.029	1.007	0.748124
UPI000013A913	DUF1318 domain-containing protein	--	11.878	30.6	4	4	5	1.034	1.1	1.053	0.852	0.999	0.95	0.879	0.060272
UPI000013BFB4	Lipopolysaccharide export system protein LptC	--	21.702	22	5	5	11	1.007	1.042	0.985	1.043	1.005	0.959	0.991	0.767707
UPI000003EAC8	30S ribosomal protein S8	--	14.126	68.5	9	9	63	1.012	1.014	0.989	0.98	1.003	1.014	0.994	0.66377
UPI0001505B9B	Putative xylanase	--	42.754	9.5	3	3	4	0.936	1.154	0.97	0.94	0.962	1.057	0.967	0.700215
UPI0000132E71	Two-component system response regulator	--	24.677	24.7	5	5	5	0.973	1.063	0.947	1.101	0.908	1.043	1.023	0.771765
UPI000013AE05	Epimerase yfcH	--	32.698	24.9	8	8	15	1.026	1.029	0.986	1.011	0.947	0.975	0.964	0.195413
UPI000013AC5E	Putative oxidoreductase	--	45.068	44	15	15	30	0.895	0.877	0.94	1.052	1.067	1.134	1.199	0.00416754
UPI00000480D9	Putative enzyme	--	37.129	26	8	8	19	1.037	1.081	1.047	0.947	0.949	0.969	0.905	0.00238974
UPI0000131523	Pyridoxine/pyridoxal/pyridoxamine kinase	--	30.847	20.8	5	5	10	0.97	0.993	0.988	1.021	1.016	1.002	1.03	0.0316664
UPI000013B225	Amino acid permease	--	47.576	3.1	2	2	3	1.046	1.065	0.994	0.921	1.034	0.956	0.938	0.177039
UPI0000111625	Ubiquinol oxidase subunit 2	--	34.911	30.8	6	6	21	1.093	1.029	1.076	1.011	0.901	0.892	0.877	0.0393862
UPI000013ABF7	HD domain protein	--	25.904	9.1	2	2	2
UPI000013BF26	Siderophore-interacting FAD-binding domain protein	--	28.871	24.8	4	4	9	0.926	0.898	0.838	1.041	1.07	1.083	1.2	0.00450997
UPI000013B25F	Acetyltransferase, GNAT family	--	18.793	54.3	7	7	7	1.007	1.041	0.976	1.012	0.984	0.997	0.99	0.647406
UPI000005236C	Protein mlc	--	44.316	19	7	7	12	0.982	0.987	1.018	1.037	0.995	1.014	1.02	0.299569
UPI0000125733	Isovaleryl CoA dehydrogenase	--	60.589	27	13	13	35	0.89	0.857	0.913	1.113	1.134	1.084	1.252	0.00056719
UPI0000131186	Phenylacetate-CoA oxygenase, PaaI subunit	--	27.877	4	1	1	1
UPI0000127CDD	Dephospho-CoA kinase	--	22.621	33.5	4	4	6	1.062	1.048	1.039	0.905	0.948	1.014	0.91	0.0477436
UPI000013B9E2	DUF2543 family protein	--	9.3212	40.7	2	2	3	1.255	0.877	0.966	0.913	0.997	1	0.939	0.665556
UPI000012C3BA	Protein HdeD	--	20.903	3.7	1	1	5	0.864	0.902	0.878	1.326	1.051	1.031	1.289	0.0390958
UPI00001639A4	3-oxoacyl-[acyl-carrier-protein] synthase 2	--	43.045	60.8	17	17	52	0.984	0.983	1.017	0.992	1.024	0.978	1.003	0.860895
UPI0000000A42	Cysteine sulfinate desulfinase	--	43.234	26.4	9	9	11	0.948	0.943	0.958	1.078	1.028	1.038	1.104	0.00295029
UPI000013B57A	UPF0307 protein YjgA	--	21.359	30.6	9	9	20	0.994	0.992	0.931	0.94	1.052	1.036	1.038	0.425699
UPI000012DB3D	Phosphofructokinase	--	32.456	42.4	11	11	57	0.972	1.001	0.956	0.979	1.038	1.031	1.041	0.157686
UPI00001278AC	GIY-YIG catalytic domain-containing protein	--	33.739	4.4	1	1	1
UPI00001328DB	PTS system, glucose-specific IIBC component	--	50.676	18.9	9	9	26	1.022	0.97	1.02	1.039	1.014	0.941	0.994	0.85734
UPI00001305B4	Two-component system sensor histidine kinase NtrB	--	38.556	19.5	6	6	7	1.095	0.93	1.102	0.998	0.924	0.97	0.925	0.275568
UPI000013A5C1	PF03733 domain protein	--	16.275	26.4	3	3	3	1.049	1.107	0.92	0.968	0.925	1.044	0.955	0.532942
UPI000012A2D4	RecBCD enzyme subunit RecC	--	128.85	9.3	9	9	10	0.94	1.039	0.944	1.028	0.991	1.02	1.04	0.312613
UPI00001654BE	Polyphosphate kinase	--	80.431	48	31	31	74	0.933	0.939	0.944	1.051	1.058	1.07	1.129	4.11523e-05
UPI00000480BF	Galactose-1-phosphate uridylyltransferase	--	39.645	50.3	17	17	47	0.942	0.964	0.972	1.05	1.035	1.051	1.09	0.00126549
UPI00001296D2	DNA polymerase III subunit alpha	--	129.9	20	20	20	24	1	0.967	1.01	1.022	1.01	1.055	1.037	0.121511
UPI000013B1C0	Lipopolysaccharide export system protein LptA	--	20.127	40	5	5	18	1.001	1.051	1.04	0.981	0.984	1.009	0.962	0.0883264
UPI000012ACEB	Cell division protein FtsQ	--	31.433	26.1	6	6	10	1.027	0.94	1.025	1.072	0.921	0.961	0.987	0.807566
UPI00000380EE	Purine nucleoside phosphorylase DeoD-type	--	25.95	72	17	17	109	1.014	0.993	0.969	1.006	1.009	0.996	1.012	0.435616
UPI000013A080	Methyltransferase domain protein	--	22.991	10.6	2	2	2	1.035	1.094	1.114	0.908	0.908	0.958	0.855	0.00537461
UPI000012C4A3	Uroporphyrinogen-III synthase	--	27.798	26	6	6	8	0.952	0.997	0.931	1.033	1.061	1.072	1.099	0.0144932
[truncated: 698 more rows]
