# Supplementary material for: A Natural Antimicrobial Agent: Analysis of Antibacterial Effect and Mechanism of Compound Phenolic Acid on Escherichia coli Based on Tandem Mass Tag Proteomics
Source: Front Microbiol. 2021 Nov 29;12:738896. doi: 10.3389/fmicb.2021.738896 (PMC8666975; doi:10.3389/fmicb.2021.738896)
Supplement: Supplementary file 2 [file Table_2.XLSX]

## Sheet: all
GO Terms Level 1	GO Terms Description	GO Terms Level	GO Terms ID	Mapping	Background	All Mapping	All Background	Fold Enrichment	Fisher's exact test p value	-log10(p value)	Related proteins
Cellular Component	methyl accepting chemotaxis protein complex	4	GO:0098561	5	5	162	1859	11.48	4.7474e-06	5.32	UPI00001277C4 UPI00001277BA UPI000012EDA2 UPI000012EDA3 UPI0001F3137B
	periplasmic space	3	GO:0042597	31	159	162	1859	2.24	6.18411e-06	5.21	UPI0000137173 UPI000013A0B5 UPI000012ED1D UPI000013B286 UPI000012B7AF UPI000004750A UPI000013A92C UPI0000129845 UPI0000128D2A UPI000012A9FA UPI000005E93B UPI0001DBCE3C UPI0000126B24 UPI000013A0B1 UPI000012B406 UPI0000130EC0 UPI0000125D6C UPI00001681A2 UPI000013A944 UPI000013C474 UPI0000131F9D UPI0000130D72 UPI000013B82E UPI000012ED29 UPI0000125ED2 UPI000012F374 UPI0000602AF3 UPI000012833C UPI0000…
	outer membrane-bounded periplasmic space	4	GO:0030288	24	134	162	1859	2.06	0.000364377	3.44	UPI0000137173 UPI000012ED1D UPI000013B286 UPI000004750A UPI000013A92C UPI0000129845 UPI0000128D2A UPI000012A9FA UPI000005E93B UPI0001DBCE3C UPI000012B406 UPI0000130EC0 UPI0000125D6C UPI000013A944 UPI000013C474 UPI0000131F9D UPI0000130D72 UPI000013B82E UPI0000125ED2 UPI000012F374 UPI0000602AF3 UPI000012833C UPI000003EB42 UPI0000139061
	[Ni-Fe] hydrogenase complex	4	GO:0044569	3	3	162	1859	11.48	0.000650615	3.19	UPI00001288E3 UPI000012ED1D UPI000012ED29
	cell envelope	4	GO:0030313	29	191	162	1859	1.74	0.0016975	2.77	UPI0000137173 UPI0000032AA9 UPI000012ED1D UPI000013B286 UPI0000133484 UPI000012B7AF UPI000004750A UPI000013A92C UPI000012A918 UPI0000129845 UPI0000128D2A UPI000012A9FA UPI000005E93B UPI0001DBCE3C UPI000012B406 UPI0000130EC0 UPI0000125D6C UPI000013A944 UPI000013C474 UPI0000131F9D UPI0000130D16 UPI0000130D72 UPI000013B82E UPI0000125ED2 UPI000012F374 UPI0000602AF3 UPI000012833C UPI000003EB42 UPI0000…
	envelope	3	GO:0031975	29	192	162	1859	1.73	0.00179269	2.75	UPI0000137173 UPI0000032AA9 UPI000012ED1D UPI000013B286 UPI0000133484 UPI000012B7AF UPI000004750A UPI000013A92C UPI000012A918 UPI0000129845 UPI0000128D2A UPI000012A9FA UPI000005E93B UPI0001DBCE3C UPI000012B406 UPI0000130EC0 UPI0000125D6C UPI000013A944 UPI000013C474 UPI0000131F9D UPI0000130D16 UPI0000130D72 UPI000013B82E UPI0000125ED2 UPI000012F374 UPI0000602AF3 UPI000012833C UPI000003EB42 UPI0000…
	bacterial-type flagellum	4	GO:0009288	3	4	162	1859	8.61	0.00243525	2.61	UPI00000000AD UPI000012A918 UPI000006146C
	sulfite reductase complex (NADPH)	4	GO:0009337	2	2	162	1859	11.48	0.0075512	2.12	UPI000016815A UPI000016815B
Molecular Function	aldehyde dehydrogenase (NAD+) activity	6	GO:0004029	5	7	192	1992	7.41	0.000141513	3.85	UPI000003EB37 UPI000012A610 UPI00000480BA UPI00001257D9 UPI000013A930
	anion transmembrane transporter activity	6	GO:0008509	14	53	192	1992	2.74	0.000302302	3.52	UPI0000138FD2 UPI0000137AF4 UPI000012FD54 UPI0000128CBA UPI000012C8B9 UPI000012A9FA UPI00001370A2 UPI0000132B86 UPI0000001701 UPI000013B534 UPI000012F374 UPI000012903D UPI000012FD8E UPI0000128B71
	enoyl-CoA hydratase activity	6	GO:0004300	5	8	192	1992	6.48	0.000347893	3.46	UPI000012A4CE UPI00001311A1 UPI000013119F UPI000012EBA1 UPI00001311A0
	oxidoreductase activity	3	GO:0016491	47	309	192	1992	1.58	0.000711686	3.15	UPI000012559D UPI000012A4CE UPI00001311A1 UPI0000137173 UPI000003EAFC UPI000012AFB6 UPI000013A0B5 UPI000004CE7A UPI000012ED1D UPI000003EB37 UPI00001118F3 UPI000012F09E UPI000016815A UPI0000033838 UPI000012F4C8 UPI0000168159 UPI0000137175 UPI0000125CB0 UPI000016F098 UPI000012C337 UPI0000129289 UPI000012EBA1 UPI0000037A2D UPI000015C836 UPI000012A610 UPI0000126B24 UPI00001680A0 UPI000013A0B1 UPI0000…
	CoA-ligase activity	5	GO:0016405	4	6	192	1992	6.92	0.0010754	2.97	UPI00001253B0 UPI000013234D UPI00001311A4 UPI00005EF10F
	cofactor binding	3	GO:0048037	41	267	192	1992	1.59	0.00118593	3.87	UPI0000168023 UPI00001288E3 UPI0000137173 UPI000003EAFC UPI000012AFB6 UPI000013A0B5 UPI000004CE7A UPI000012C336 UPI000013ABB4 UPI00001118F3 UPI000016815A UPI000012F4C8 UPI0000137175 UPI0000125CB0 UPI000016F098 UPI000012C337 UPI0000129845 UPI000016820D UPI000012B8DD UPI000003EB39 UPI00001680A0 UPI00000480BA UPI000002C675 UPI0000168220 UPI0000EAE00D UPI000002C264 UPI0000000F69 UPI000003EAFE UPI0000…
	acid-thiol ligase activity	5	GO:0016878	4	7	192	1992	5.93	0.00232057	2.63	UPI00001253B0 UPI000013234D UPI00001311A4 UPI00005EF10F
	organic acid transmembrane transporter activity	5	GO:0005342	10	38	192	1992	2.73	0.00232886	2.63	UPI0000138FD2 UPI000012FD54 UPI000012C8B9 UPI000012A9FA UPI00001370A2 UPI0000132B86 UPI0000001701 UPI000013B534 UPI000012903D UPI0000128B71
Biological Process	monocarboxylic acid catabolic process	7	GO:0072329	25	68	207	2108	3.74	9.58048e-10	9.02	UPI0000168023 UPI000012A4CE UPI00001311A1 UPI000012C338 UPI000012AFB6 UPI000004CE7A UPI000012C336 UPI000013119F UPI000012F09D UPI000012F09E UPI000012C339 UPI000012C337 UPI000012B8DD UPI000012EBA1 UPI00001311A3 UPI00001253B0 UPI0000168022 UPI0000137F17 UPI0001B525AB UPI00001311A4 UPI00000480BA UPI000002C264 UPI00001311A0 UPI00005EF10F UPI000016F117
	carboxylic acid catabolic process	6	GO:0046395	36	129	207	2108	2.84	1.14407e-09	8.94	UPI0000168023 UPI000012A4CE UPI00001311A1 UPI000012C338 UPI000012AFB6 UPI000004CE7A UPI000012C336 UPI000013119F UPI000012F09D UPI000012F09E UPI000012C339 UPI000012C337 UPI000012B8DD UPI0000125136 UPI000012EBA1 UPI00001311A3 UPI000003EB39 UPI00001253B0 UPI0000168022 UPI0000137F17 UPI0001B525AB UPI00001311A4 UPI00000480BA UPI000013AEAC UPI0000135738 UPI0000168220 UPI000003EB36 UPI000002C264 UPI0000…
	cellular biogenic amine metabolic process	6	GO:0006576	14	28	207	2108	5.09	5.87993e-08	7.23	UPI00001375B8 UPI000013A6DD UPI0000129289 UPI000012B8DD UPI000013A6DB UPI000012A610 UPI0000168220 UPI000013A6DC UPI0000EAE00D UPI000002C264 UPI000003CA87 UPI0000128FF8 UPI000013A930 UPI00001639B2
	putrescine catabolic process	6	GO:0009447	8	9	207	2108	9.05	6.29699e-08	7.2	UPI000013A6DD UPI0000129289 UPI000012B8DD UPI000013A6DB UPI000013A6DC UPI0000EAE00D UPI000002C264 UPI000013A930
	amine catabolic process	6	GO:0009310	9	12	207	2108	7.64	1.22077e-07	6.91	UPI000013A6DD UPI0000129289 UPI000012B8DD UPI000013A6DB UPI000012A610 UPI000013A6DC UPI0000EAE00D UPI000002C264 UPI000013A930
	cellular biogenic amine catabolic process	7	GO:0042402	9	12	207	2108	7.64	1.22077e-07	6.91	UPI000013A6DD UPI0000129289 UPI000012B8DD UPI000013A6DB UPI000012A610 UPI000013A6DC UPI0000EAE00D UPI000002C264 UPI000013A930
	polyamine metabolic process	7	GO:0006595	10	18	207	2108	5.66	1.46507e-06	5.83	UPI000013A6DD UPI0000129289 UPI000012B8DD UPI000013A6DB UPI0000168220 UPI000013A6DC UPI0000EAE00D UPI000002C264 UPI0000128FF8 UPI000013A930
	phenylacetate catabolic process	6	GO:0010124	7	10	207	2108	7.13	7.42157e-06	5.13	UPI000012A4CE UPI00001311A1 UPI000013119F UPI000012EBA1 UPI00001311A3 UPI00001311A4 UPI00001311A0
	anion transport	6	GO:0006820	24	96	207	2108	2.55	7.92772e-06	5.1	UPI0000138FD2 UPI000013570C UPI0000137AF4 UPI000012A64B UPI000012FD54 UPI0000128CBA UPI000013B286 UPI000012C8B9 UPI000013B1E3 UPI0000128D2A UPI000012A9FA UPI000005E93B UPI0001DBCE3C UPI00001370A2 UPI0000132B86 UPI0000001701 UPI0000130D72 UPI000013B534 UPI0000125ED2 UPI000012F374 UPI000012903D UPI000012FD8E UPI0000128B71 UPI000003EB42
	carboxylic acid transport	6	GO:0046942	17	64	207	2108	2.71	8.01754e-05	4.1	UPI0000138FD2 UPI000013570C UPI000012FD54 UPI000013B286 UPI000012C8B9 UPI000013B1E3 UPI000012A9FA UPI0001DBCE3C UPI00001370A2 UPI0000132B86 UPI0000001701 UPI0000130D72 UPI000013B534 UPI0000125ED2 UPI000012903D UPI0000128B71 UPI000003EB42
	3-phenylpropionate metabolic process	6	GO:0018962	4	4	207	2108	10.18	9.05683e-05	4.04	UPI000012C338 UPI000012C336 UPI000012C339 UPI000012C337
	3-phenylpropionate catabolic process	6	GO:0019380	4	4	207	2108	10.18	9.05683e-05	4.04	UPI000012C338 UPI000012C336 UPI000012C339 UPI000012C337
	organic anion transport	6	GO:0015711	20	84	207	2108	2.42	0.000101466	3.99	UPI0000138FD2 UPI000013570C UPI0000137AF4 UPI000012A64B UPI000012FD54 UPI000013B286 UPI000012C8B9 UPI000013B1E3 UPI000012A9FA UPI000005E93B UPI0001DBCE3C UPI00001370A2 UPI0000132B86 UPI0000001701 UPI0000130D72 UPI000013B534 UPI0000125ED2 UPI000012903D UPI0000128B71 UPI000003EB42
	fatty acid catabolic process	6	GO:0009062	8	19	207	2108	4.29	0.000220234	3.66	UPI0000168023 UPI000012A4CE UPI00001311A1 UPI000013119F UPI0000168022 UPI00001311A0 UPI00005EF10F UPI000016F117
